# Supplementary material for: Elucidating the pathological axis of hIAPP-mediated β-cell toxicity: A MATLAB-based network modelling
Source: Research Square preprint supplement (doi:10.21203/rs.3.rs-7722499/v1), 2025-10-22
Supplement: Supplementary file 1 [file 8e80656f634bb9f7a6521a1c.xlsx]

## Sheet: Sensitivity
	[BC].Insulin	[BC].[Insulin Receptor]	[BC].IRS1	[BC].SHP2	[BC].GRB2	[BC].PI3K	[BC].PIP2	[BC].PIP3	[BC].RAS	[BC].RAF	[BC].MEK	[BC].[ERK1/2]	[BC].AKT	[BC].mTORC1	[BC].[4EBP1]	[BC].eIF4E	[BC].[Ribosomal S6]	[BC].S6K	[BC].Rheb	[BC].[TSC1/2]	[BC].[Protein Synthesis]	[BC].GSK3B	[BC].[IKKab (NEMO)]	[BC].IKab	[BC].[Inhibition of Glycogen Breakdown]	[BC].GLUT4	[BC].GLUCOSE	[BC].[Glucose-6-Phosphate]	[BC].Hexokinase	[BC].[1, 3-bisphosphoglycerate]	[BC].[Phosphoglucose isomerase]	[BC].[Fructose bisphosphate aldolase]	[BC].[Fructose 1,6-bisphosphate]	[BC].[Fructose-6-Phosphate]	[BC].Phosphofructokinase	[BC].[2-Phosphoglycerate]	[BC].[3-Phosphoglycerate]	[BC].[Gleceraldehyde 3-phosphate]	[BC].[Phosphoglycerate kinase]	[BC].[Phosphoglycerate mutase]	[BC].Phosphoenolpyruvate	[BC]. DHAP	[BC].[Glyceraldehyde 3-P dehydrogenase]	[BC].Enolase	[BC].PYRUVATE	[BC].[Pyruvate dehydrogenase]	[BC].[Pyruvate kinase]	[BC].[CTR-RAMP3]	[BC].[Adenylyl Cyclase]
[BC].Insulin	0	0	0.624925	3.42293e-05	3.42293e-05	3.29131e-06	4.08905e-09	2.23401e-11	3.29485e-06	5.69836e-10	3.45231e-12	8.92992e-15	2.44188e-13	0	0	0	0	0	0	0	0	0	0	0	0	1.2346e-16	6.51841e-20	4.02426e-23	0	3.53751e-34	0	0	6.88779e-26	4.5772e-28	0	3.37753e-38	8.35123e-35	2.72482e-29	0	0	1.60927e-42	2.71408e-29	0	0	1.98891e-43	0	0	0	0
[BC].[Insulin Receptor]	0	0	0.862396	4.72364e-05	4.72364e-05	4.54201e-06	5.64289e-09	3.08294e-11	4.54689e-06	7.86373e-10	4.76419e-12	1.23233e-14	3.3698e-13	0	0	0	0	0	0	0	0	0	0	0	0	1.70375e-16	8.99541e-20	5.55347e-23	0	4.88177e-34	0	0	9.50515e-26	6.31654e-28	0	4.66098e-38	1.15247e-34	3.76025e-29	0	0	2.22079e-42	3.74543e-29	0	0	2.74469e-43	0	0	0	0
[BC].IRS1	0	0	0	0.000127081	0.000127081	1.47271e-05	2.29941e-08	1.48661e-10	1.47469e-05	3.28684e-09	2.35175e-11	6.91773e-14	1.81432e-12	0	0	0	0	0	0	0	0	0	0	0	0	1.03977e-15	6.602e-19	5.2917e-22	0	1.57161e-32	0	0	1.27404e-24	9.63105e-27	0	1.79042e-36	4.04912e-33	7.3835e-28	0	0	9.17511e-41	7.34692e-28	0	0	1.16641e-41	0	0	0	0
[BC].SHP2	0	0	0	0	0	0.121283	0.000222534	1.59309e-06	0	0	0	0	2.08111e-08	0	0	0	0	0	0	0	0	0	0	0	0	1.22842e-11	6.97677e-15	4.01949e-18	0	9.49293e-30	0	0	5.36119e-21	3.20777e-23	0	5.26351e-34	1.76712e-30	1.39063e-24	0	0	1.76413e-38	1.38691e-24	0	0	1.78518e-39	0	0	0	0
[BC].GRB2	0	0	0	0	0	0	0	0	0.12179	3.18233e-05	2.50088e-07	7.81013e-10	0	0	0	0	0	0	0	0	0	0	0	0	0	0	0	0	0	0	0	0	0	0	0	0	0	0	0	0	0	0	0	0	0	0	0	0	0
[BC].PI3K	0	0	0	0	0	0	0.0072509	9.7705e-05	0	0	0	0	1.8667e-06	0	0	0	0	0	0	0	0	0	0	0	0	1.69391e-09	1.56271e-12	1.52169e-15	0	3.31455e-26	0	0	3.73778e-18	2.67728e-20	0	3.61408e-30	8.29943e-27	1.95834e-21	0	0	1.99774e-34	1.94935e-21	0	0	2.70767e-35	0	0	0	0
[BC].PIP2	0	0	0	0	0	0	0	0.0216576	0	0	0	0	0.000528384	0	0	0	0	0	0	0	0	0	0	0	0	5.7904e-07	5.69699e-10	5.38352e-13	0	5.13312e-24	0	0	1.14987e-15	7.16372e-18	0	5.21517e-28	1.7718e-24	4.70034e-19	0	0	2.88813e-32	4.68204e-19	0	0	3.95908e-33	0	0	0	0
[BC].PIP3	0	0	0	0	0	0	0	0	0	0	0	0	0.0404885	0	0	0	0	0	0	0	0	0	0	0	0	7.02144e-05	9.72534e-08	1.15283e-10	0	2.83831e-13	0	0	1.72579e-15	1.72579e-15	0	1.12257e-25	2.97439e-22	1.24001e-16	0	0	5.24042e-30	1.23517e-16	0	0	6.47261e-31	0	0	0	0
[BC].RAS	0	0	0	0	0	0	0	0	0	0.00121223	1.78061e-05	8.82217e-08	0	0	0	0	0	0	0	0	0	0	0	0	0	0	0	0	0	0	0	0	0	0	0	0	0	0	0	0	0	0	0	0	0	0	0	0	0
[BC].RAF	0	0	0	0	0	0	0	0	0	0	0.021893	0.000138091	0	0	0	0	0	0	0	0	0	0	0	0	0	0	0	0	0	0	0	0	0	0	0	0	0	0	0	0	0	0	0	0	0	0	0	0	0
[BC].MEK	0	0	0	0	0	0	0	0	0	0	0	0.0134578	0	0	0	0	0	0	0	0	0	0	0	0	0	0	0	0	0	0	0	0	0	0	0	0	0	0	0	0	0	0	0	0	0	0	0	0	0
[BC].[ERK1/2]	0	0	0	0	0	0	0	0	0	0	0	0	0	0	0	0	0	0	0	0	0	0	0	0	0	0	0	0	0	0	0	0	0	0	0	0	0	0	0	0	0	0	0	0	0	0	0	0	0
[BC].AKT	0	0	0	0	0	0	0	0	0	0	0	0	0	0	0	0	0	0	0	0	0	0	0	0	0	0.00516211	1.30015e-05	2.39611e-08	0	1.67021e-18	0	0	9.23761e-11	6.61342e-13	0	2.28091e-22	4.53068e-19	6.88634e-14	0	0	1.37652e-26	6.84554e-14	0	0	1.91342e-27	0	0	0	0
[BC].mTORC1	0	0	0	0	0	0	0	0	0	0	0	0	0	0	0	0	0.000224185	0.000644911	0	0	1.21688e-06	0	0	0	0	0	0	0	0	0	0	0	0	0	0	0	0	0	0	0	0	0	0	0	0	0	0	0	0
[BC].[4EBP1]	0	0	0	0	0	0	0	0	0	0	0	0	0	0	0	0.171656	0	0	0	0	0.0273857	0	0	0	0	0	0	0	0	0	0	0	0	0	0	0	0	0	0	0	0	0	0	0	0	0	0	0	0
[BC].eIF4E	0	0	0	0	0	0	0	0	0	0	0	0	0	0	0	0	0	0	0	0	0.328881	0	0	0	0	0	0	0	0	0	0	0	0	0	0	0	0	0	0	0	0	0	0	0	0	0	0	0	0
[BC].[Ribosomal S6]	0	0	0	0	0	0	0	0	0	0	0	0	0	0	0	0	0	0	0	0	0.025804	0	0	0	0	0	0	0	0	0	0	0	0	0	0	0	0	0	0	0	0	0	0	0	0	0	0	0	0
[BC].S6K	0	0	0	0	0	0	0	0	0	0	0	0	0	0	0	0	0.310873	0	0	0	0.00181935	0	0	0	0	0	0	0	0	0	0	0	0	0	0	0	0	0	0	0	0	0	0	0	0	0	0	0	0
[BC].Rheb	0	0	0	0	0	0	0	0	0	0	0	0	0	0.999882	0	0	2.25832e-05	9.05245e-05	0	0	5.96681e-08	0	0	0	0	0	0	0	0	0	0	0	0	0	0	0	0	0	0	0	0	0	0	0	0	0	0	0	0
[BC].[TSC1/2]	0	0	0	0	0	0	0	0	0	0	0	0	0	0.92907	0	0	1.54296e-06	1.41556e-05	0.225906	0	2.09083e-09	0	0	0	0	0	0	0	0	0	0	0	0	0	0	0	0	0	0	0	0	0	0	0	0	0	0	0	0
[BC].[Protein Synthesis]	0	0	0	0	0	0	0	0	0	0	0	0	0	0	0	0	0	0	0	0	0	0	0	0	0	0	0	0	0	0	0	0	0	0	0	0	0	0	0	0	0	0	0	0	0	0	0	0	0
[BC].GSK3B	0	0	0	0	0	0	0	0	0	0	0	0	0	0	0	0	0	0	0	0	0	0	0	0	0.999997	0	0	0	0	0	0	0	0	0	0	0	0	0	0	0	0	0	0	0	0	0	0	0	0
[BC].[IKKab (NEMO)]	0	0	0	0	0	0	0	0	0	0	0	0	0	0	0	0	0	0	0	0	0	0	0	0.963875	0	0	0	0	0	0	0	0	0	0	0	0	0	0	0	0	0	0	0	0	0	0	0	0	0
[BC].IKab	0	0	0	0	0	0	0	0	0	0	0	0	0	0	0	0	0	0	0	0	0	0	0	0	0	0	0	0	0	0	0	0	0	0	0	0	0	0	0	0	0	0	0	0	0	0	0	0	0
[BC].[Inhibition of Glycogen Breakdown]	0	0	0	0	0	0	0	0	0	0	0	0	0	0	0	0	0	0	0	0	0	0	0	0	0	0	0	0	0	0	0	0	0	0	0	0	0	0	0	0	0	0	0	0	0	0	0	0	0
[BC].GLUT4	0	0	0	0	0	0	0	0	0	0	0	0	0	0	0	0	0	0	0	0	0	0	0	0	0	0	0.00498483	1.29674e-05	0	1.11624e-15	0	0	6.00243e-08	3.77305e-10	0	1.52885e-19	3.0131e-16	4.78211e-11	0	0	9.87814e-24	4.75296e-11	0	0	1.44205e-24	0	0	0	0
[BC].GLUCOSE	0	0	0	0	0	0	0	0	0	0	0	0	0	0	0	0	0	0	0	0	0	0	0	0	0	0	0	0.00513948	0	6.17423e-05	0	0	3.37757e-05	2.20566e-07	0	7.14285e-17	1.57807e-13	3.12804e-08	0	0	4.07106e-21	3.10801e-08	0	0	5.59727e-22	0	0	0	0
[BC].[Glucose-6-Phosphate]	0	0	0	0	0	0	0	0	0	0	0	0	0	0	0	0	0	0	0	0	0	0	0	0	0	0	0	0	0	1.54757e-13	0	0	3.74022e-05	0.00012454	0	1.66497e-17	3.72314e-14	1.20805e-08	0	0	1.0237e-21	1.20309e-08	0	0	1.46338e-22	0	0	0	0
[BC].Hexokinase	0	0	0	0	0	0	0	0	0	0	0	0	0	0	0	0	0	0	0	0	0	0	0	0	0	0	0	0	0	0	0	0	0	0	0	0	0	0	0	0	0	0	0	0	0	0	0	0	0
[BC].[1, 3-bisphosphoglycerate]	0	0	0	0	0	0	0	0	0	0	0	0	0	0	0	0	0	0	0	0	0	0	0	0	0	0	0	0	0	0	0	0	0	0	0	0.000234392	0.274722	0	0	0	2.62128e-08	0	0	0	4.71236e-09	0	0	0	0
[BC].[Phosphoglucose isomerase]	0	0	0	0	0	0	0	0	0	0	0	0	0	0	0	0	0	0	0	0	0	0	0	0	0	0	0	0	0	0	0	0	0	0	0	0	0	0	0	0	0	0	0	0	0	0	0	0	0
[BC].[Fructose bisphosphate aldolase]	0	0	0	0	0	0	0	0	0	0	0	0	0	0	0	0	0	0	0	0	0	0	0	0	0	0	0	0	0	0	0	0	0	0	0	0	0	0	0	0	0	0	0	0	0	0	0	0	0
[BC].[Fructose 1,6-bisphosphate]	0	0	0	0	0	0	0	0	0	0	0	0	0	0	0	0	0	0	0	0	0	0	0	0	0	0	0	0	0	1.08774e-07	0	0	0	0	0	1.95089e-11	3.15095e-08	0.00277702	0	0	1.65566e-15	0.00274827	0	0	2.70874e-16	0	0	0	0
[BC].[Fructose-6-Phosphate]	0	0	0	0	0	0	0	0	0	0	0	0	0	0	0	0	0	0	0	0	0	0	0	0	0	0	0	0	0	1.37055e-09	0	0	0.275557	0	0	1.47839e-13	3.37972e-10	0.000102164	0	0	7.91569e-18	0.000101693	0	0	1.04423e-18	0	0	0	0
[BC].Phosphofructokinase	0	0	0	0	0	0	0	0	0	0	0	0	0	0	0	0	0	0	0	0	0	0	0	0	0	0	0	0	0	0	0	0	0	0	0	0	0	0	0	0	0	0	0	0	0	0	0	0	0
[BC].[2-Phosphoglycerate]	0	0	0	0	0	0	0	0	0	0	0	0	0	0	0	0	0	0	0	0	0	0	0	0	0	0	0	0	0	0	0	0	0	0	0	0	0	0	0	0	0.000751416	0	0	0	0.000186306	0	0	0	0
[BC].[3-Phosphoglycerate]	0	0	0	0	0	0	0	0	0	0	0	0	0	0	0	0	0	0	0	0	0	0	0	0	0	0	0	0	0	0	0	0	0	0	0	0.00554557	0	0	0	0	1.68528e-06	0	0	0	3.84458e-07	0	0	0	0
[BC].[Gleceraldehyde 3-phosphate]	0	0	0	0	0	0	0	0	0	0	0	0	0	0	0	0	0	0	0	0	0	0	0	0	0	0	0	0	0	9.77379e-05	0	0	0	0	0	2.08419e-08	2.90852e-05	0	0	0	2.0497e-12	0	0	0	3.53231e-13	0	0	0	0
[BC].[Phosphoglycerate kinase]	0	0	0	0	0	0	0	0	0	0	0	0	0	0	0	0	0	0	0	0	0	0	0	0	0	0	0	0	0	0	0	0	0	0	0	0	0	0	0	0	0	0	0	0	0	0	0	0	0
[BC].[Phosphoglycerate mutase]	0	0	0	0	0	0	0	0	0	0	0	0	0	0	0	0	0	0	0	0	0	0	0	0	0	0	0	0	0	0	0	0	0	0	0	0	0	0	0	0	0	0	0	0	0	0	0	0	0
[BC].Phosphoenolpyruvate	0	0	0	0	0	0	0	0	0	0	0	0	0	0	0	0	0	0	0	0	0	0	0	0	0	0	0	0	0	0	0	0	0	0	0	0	0	0	0	0	0	0	0	0	0.23138	0	0	0	0
[BC].DHAP	0	0	0	0	0	0	0	0	0	0	0	0	0	0	0	0	0	0	0	0	0	0	0	0	0	0	0	0	0	0	0	0	0	0	0	0	0	0	0	0	0	0	0	0	0	0	0	0	0
[BC].[Glyceraldehyde 3-P dehydrogenase]	0	0	0	0	0	0	0	0	0	0	0	0	0	0	0	0	0	0	0	0	0	0	0	0	0	0	0	0	0	0	0	0	0	0	0	0	0	0	0	0	0	0	0	0	0	0	0	0	0
[BC].Enolase	0	0	0	0	0	0	0	0	0	0	0	0	0	0	0	0	0	0	0	0	0	0	0	0	0	0	0	0	0	0	0	0	0	0	0	0	0	0	0	0	0	0	0	0	0	0	0	0	0
[BC].PYRUVATE	0	0	0	0	0	0	0	0	0	0	0	0	0	0	0	0	0	0	0	0	0	0	0	0	0	0	0	0	0	0	0	0	0	0	0	0	0	0	0	0	1.73311e-31	0	0	0	0	0	0	0	0
[BC].[Pyruvate dehydrogenase]	0	0	0	0	0	0	0	0	0	0	0	0	0	0	0	0	0	0	0	0	0	0	0	0	0	0	0	0	0	0	0	0	0	0	0	0	0	0	0	0	0	0	0	0	0	0	0	0	0
[BC].[Pyruvate kinase]	0	0	0	0	0	0	0	0	0	0	0	0	0	0	0	0	0	0	0	0	0	0	0	0	0	0	0	0	0	0	0	0	0	0	0	0	0	0	0	0	0	0	0	0	0	0	0	0	0
[BC].[CTR-RAMP3]	0	0	0	0	0	0	0	0	0	0	0	0	0	0	0	0	0	0	0	0	0	0	0	0	0	0	0	0	0	0	0	0	0	0	0	0	0	0	0	0	0	0	0	0	0	0	0	0	0.00187383
[BC].[Adenylyl Cyclase]	0	0	0	0	0	0	0	0	0	0	0	0	0	0	0	0	0	0	0	0	0	0	0	0	0	0	0	0	0	0	0	0	0	0	0	0	0	0	0	0	0	0	0	0	0	0	0	0	0
[BC].[GαS/GαQ]	0	0	0	0	0	0	0	0	0	0	0	0	0	0	0	0	0	0	0	0	0	0	0	0	0	0	0	0	0	0	0	0	0	0	0	0	0	0	0	0	0	0	0	0	0	0	0	0	0.00387893
[BC].[Secretory Granules]	0	0	0	0	0	0	0	0	0	0	0	0	0	0	0	0	0	0	0	0	0	0	0	0	0	0	0	0	0	0	0	0	0	0	0	0	0	0	0	0	0	0	0	0	0	0	0	0	0
[BC].[hIAPP monomer]	0	0	0	0	0	0	0	0	0	0	0	0	0	0	0	0	0	0	0	0	0	0	0	0	0	0	0	0	0	0	0	0	0	0	0	0	0	0	0	0	0	0	0	0	0	0	0	0	0
[BC].[Amyloid Fibrils]	0	0	0	0	0	0	0	0	6.2202e-05	2.61354e-08	2.42027e-10	8.35782e-13	0	0	0	0	0	0	0	0	0	0	0	0	0	0	0	0	0	0	0	0	0	0	0	0	0	0	0	0	0	0	0	0	0	0	0	0	0.00134703
[BC].RAGE	0	0	0	0	0	0	0	0	0.000144572	6.07397e-08	5.57172e-10	1.87277e-12	0	0	0	0	0	0	0	0	0	0	0	0	0	0	0	0	0	0	0	0	0	0	0	0	0	0	0	0	0	0	0	0	0	0	0	0	0
[BC].PKC	0	0	0	0	0	0	0	0	0.000328873	2.08134e-07	2.39815e-09	1.01191e-11	0	0	0	0	0	0	0	0	0	0	0	0	0	0	0	0	0	0	0	0	0	0	0	0	0	0	0	0	0	0	0	0	0	0	0	0	0
[BC].MAPK	0	0	0	0	0	0	0	0	0	0	0	0	0	0	0	0	0	0	0	0	0	0	0	0	0	0	0	0	0	0	0	0	0	0	0	0	0	0	0	0	0	0	0	0	0	0	0	0	0
[BC].[Ca+]	0	0	0	0	0	0	0	0	0	0	0	0	0	0	0	0	0	0	0	0	0	0	0	0	0	0	0	0	0	0	0	0	0	0	0	0	0	0	0	0	0	0	0	0	0	0	0	0	0
[BC].[Caspase 1]	0	0	0	0	0	0	0	0	0	0	0	0	0	0	0	0	0	0	0	0	0	0	0	0	0	0	0	0	0	0	0	0	0	0	0	0	0	0	0	0	0	0	0	0	0	0	0	0	0
[BC].[Caspase 2]	0	0	0	0	0	0	0	0	0	0	0	0	0	0	0	0	0	0	0	0	0	0	0	0	0	0	0	0	0	0	0	0	0	0	0	0	0	0	0	0	0	0	0	0	0	0	0	0	0
[BC].[Caspase 3/6/7]	0	0	0	0	0	0	0	0	0	0	0	0	0	0	0	0	0	0	0	0	0	0	0	0	0	0	0	0	0	0	0	0	0	0	0	0	0	0	0	0	0	0	0	0	0	0	0	0	0
[BC].[Caspase 8]	0	0	0	0	0	0	0	0	0	0	0	0	0	0	0	0	0	0	0	0	0	0	0	0	0	0	0	0	0	0	0	0	0	0	0	0	0	0	0	0	0	0	0	0	0	0	0	0	0
[BC].[Caspase 9]	0	0	0	0	0	0	0	0	0	0	0	0	0	0	0	0	0	0	0	0	0	0	0	0	0	0	0	0	0	0	0	0	0	0	0	0	0	0	0	0	0	0	0	0	0	0	0	0	0
[BC].[Caspase 10]	0	0	0	0	0	0	0	0	0	0	0	0	0	0	0	0	0	0	0	0	0	0	0	0	0	0	0	0	0	0	0	0	0	0	0	0	0	0	0	0	0	0	0	0	0	0	0	0	0
[BC].Calpain	0	0	0	0	0	0	0	0	0	0	0	0	0	0	0	0	0	0	0	0	0	0	0	0	0	0	0	0	0	0	0	0	0	0	0	0	0	0	0	0	0	0	0	0	0	0	0	0	0
[BC].cAMP	0	0	0	0	0	0	0	0	0	0	0	0	0	0	0	0	0	0	0	0	0	0	0	0	0	0	0	0	0	0	0	0	0	0	0	0	0	0	0	0	0	0	0	0	0	0	0	0	0
[BC].Procaspases	0	0	0	0	0	0	0	0	0	0	0	0	0	0	0	0	0	0	0	0	0	0	0	0	0	0	0	0	0	0	0	0	0	0	0	0	0	0	0	0	0	0	0	0	0	0	0	0	0
[BC].ATP	0	0	0	0	0	0	0	0	0	0	0	0	0	0	0	0	0	0	0	0	0	0	0	0	0	0	0	0	0	0	0	0	0	0	0	0	0	0	0	0	0	0	0	0	0	0	0	0	0
[BC].Inflammasome	0	0	0	0	0	0	0	0	0	0	0	0	0	0	0	0	0	0	0	0	0	0	0	0	0	0	0	0	0	0	0	0	0	0	0	0	0	0	0	0	0	0	0	0	0	0	0	0	0
[BC].[Ubiquitin Ligases]	0	0	0	0	0	0	0	0	0	0	0	0	0	0	0	0	0	0	0	0	0	0	0	0	0	0	0	0	0	0	0	0	0	0	0	0	0	0	0	0	0	0	0	0	0	0	0	0	0
[BC].[Insulin Resistance]	0	0	0	0	0	0	0	0	0	0	0	0	0	0	0	0	0	0	0	0	0	0	0	0	0	0	0	0	0	0	0	0	0	0	0	0	0	0	0	0	0	0	0	0	0	0	0	0	0
[BC].[Closure of K+ Channels]	0	0	0	0	0	0	0	0	0	0	0	0	0	0	0	0	0	0	0	0	0	0	0	0	0	0	0	0	0	0	0	0	0	0	0	0	0	0	0	0	0	0	0	0	0	0	0	0	0
[BC].LYSOSOMES	0	0	0	0	0	0	0	0	0	0	0	0	0	0	0	0	0	0	0	0	0	0	0	0	0	0	0	0	0	0	0	0	0	0	0	0	0	0	0	0	0	0	0	0	0	0	0	0	0
[BC].[Depletion of Lysosome]	0	0	0	0	0	0	0	0	0	0	0	0	0	0	0	0	0	0	0	0	0	0	0	0	0	0	0	0	0	0	0	0	0	0	0	0	0	0	0	0	0	0	0	0	0	0	0	0	0
[BC].[Polyubiquitinated Proteins]	0	0	0	0	0	0	0	0	0	0	0	0	0	0	0	0	0	0	0	0	0	0	0	0	0	0	0	0	0	0	0	0	0	0	0	0	0	0	0	0	0	0	0	0	0	0	0	0	0
[BC].Methylglyoxal	0	0	0	0	0	0	0	0	0	0	0	0	0	0	0	0	0	0	0	0	0	0	0	0	0	0	0	0	0	0	0	0	0	0	0	0	0	0	0	0	0	0	0	0	0	0	0	0	0
[BC].[Sorbitol Dehydrogenase]	0	0	0	0	0	0	0	0	0	0	0	0	0	0	0	0	0	0	0	0	0	0	0	0	0	0	0	0	0	0	0	0	0	0	0	0	0	0	0	0	0	0	0	0	0	0	0	0	0
[BC].Sorbitol	0	0	0	0	0	0	0	0	0	0	0	0	0	0	0	0	0	0	0	0	0	0	0	0	0	0	0	0	0	4.69921e-10	0	0	0.0141313	0	0	6.78922e-14	1.28636e-10	1.92644e-05	0	0	4.71148e-18	1.91129e-05	0	0	7.15359e-19	0	0	0	0
[BC].ULK1	0	0	0	0	0	0	0	0	0	0	0	0	0	0	0	0	0	0	0	0	0	0	0	0	0	0	0	0	0	0	0	0	0	0	0	0	0	0	0	0	0	0	0	0	0	0	0	0	0
[BC].[AUTOPHAGY DEFECT]	0	0	0	0	0	0	0	0	0	0	0	0	0	0	0	0	0	0	0	0	0	0	0	0	0	0	0	0	0	0	0	0	0	0	0	0	0	0	0	0	0	0	0	0	0	0	0	0	0
[BC].FADD	0	0	0	0	0	0	0	0	0	0	0	0	0	0	0	0	0	0	0	0	0	0	0	0	0	0	0	0	0	0	0	0	0	0	0	0	0	0	0	0	0	0	0	0	0	0	0	0	0
[BC].FAS	0	0	0	0	0	0	0	0	0	0	0	0	0	0	0	0	0	0	0	0	0	0	0	0	0	0	0	0	0	0	0	0	0	0	0	0	0	0	0	0	0	0	0	0	0	0	0	0	0
[BC].BID	0	0	0	0	0	0	0	0	0	0	0	0	0	0	0	0	0	0	0	0	0	0	0	0	0	0	0	0	0	0	0	0	0	0	0	0	0	0	0	0	0	0	0	0	0	0	0	0	0
[BC].PARP	0	0	0	0	0	0	0	0	0	0	0	0	0	0	0	0	0	0	0	0	0	0	0	0	0	0	0	0	0	0	0	0	0	0	0	0	0	0	0	0	0	0	0	0	0	0	0	0	0
[BC].APAF1	0	0	0	0	0	0	0	0	0	0	0	0	0	0	0	0	0	0	0	0	0	0	0	0	0	0	0	0	0	0	0	0	0	0	0	0	0	0	0	0	0	0	0	0	0	0	0	0	0
[BC].CytoC	0	0	0	0	0	0	0	0	0	0	0	0	0	0	0	0	0	0	0	0	0	0	0	0	0	0	0	0	0	0	0	0	0	0	0	0	0	0	0	0	0	0	0	0	0	0	0	0	0
[BC].[IL1β]	0	0	0	0	0	0	0	0	0	0	0	0	0	0	0	0	0	0	0	0	0	0	0	0	0	0	0	0	0	0	0	0	0	0	0	0	0	0	0	0	0	0	0	0	0	0	0	0	0
[BC].IL6	0	0	0	0	0	0	0	0	0	0	0	0	0	0	0	0	0	0	0	0	0	0	0	0	0	0	0	0	0	0	0	0	0	0	0	0	0	0	0	0	0	0	0	0	0	0	0	0	0
[BC].IL18	0	0	0	0	0	0	0	0	0	0	0	0	0	0	0	0	0	0	0	0	0	0	0	0	0	0	0	0	0	0	0	0	0	0	0	0	0	0	0	0	0	0	0	0	0	0	0	0	0
[BC].[TNFα]	0	0	0	0	0	0	0	0	0	0	0	0	0	0	0	0	0	0	0	0	0	0	0	0	0	0	0	0	0	0	0	0	0	0	0	0	0	0	0	0	0	0	0	0	0	0	0	0	0
[BC].[Beta Cell Death]	0	0	0	0	0	0	0	0	0	0	0	0	0	0	0	0	0	0	0	0	0	0	0	0	0	0	0	0	0	0	0	0	0	0	0	0	0	0	0	0	0	0	0	0	0	0	0	0	0
[BC].TFEB	0	0	0	0	0	0	0	0	0	0	0	0	0	0	0	0	0	0	0	0	0	0	0	0	0	0	0	0	0	0	0	0	0	0	0	0	0	0	0	0	0	0	0	0	0	0	0	0	0
[BC].p62	0	0	0	0	0	0	0	0	0	0	0	0	0	0	0	0	0	0	0	0	0	0	0	0	0	0	0	0	0	0	0	0	0	0	0	0	0	0	0	0	0	0	0	0	0	0	0	0	0
[BC].JAK	0	0	0	0	0	0	0	0	0	0	0	0	0	0	0	0	0	0	0	0	0	0	0	0	0	0	0	0	0	0	0	0	0	0	0	0	0	0	0	0	0	0	0	0	0	0	0	0	0
[BC].JNK	0	0	0	0	0	0	0	0	0	0	0	0	0	0	0	0	0	0	0	0	0	0	0	0	0	0	0	0	0	0	0	0	0	0	0	0	0	0	0	0	0	0	0	0	0	0	0	0	0
[BC].FLIP	0	0	0	0	0	0	0	0	0	0	0	0	0	0	0	0	0	0	0	0	0	0	0	0	0	0	0	0	0	0	0	0	0	0	0	0	0	0	0	0	0	0	0	0	0	0	0	0	0
[BC].[Aldose Reductase]	0	0	0	0	0	0	0	0	0	0	0	0	0	0	0	0	0	0	0	0	0	0	0	0	0	0	0	0	0	0	0	0	0	0	0	0	0	0	0	0	0	0	0	0	0	0	0	0	0
[BC].NLRP3	0	0	0	0	0	0	0	0	0	0	0	0	0	0	0	0	0	0	0	0	0	0	0	0	0	0	0	0	0	0	0	0	0	0	0	0	0	0	0	0	0	0	0	0	0	0	0	0	0
[Mt].[Acetyl CoA]	0	0	0	0	0	0	0	0	0	0	0	0	0	0	0	0	0	0	0	0	0	0	0	0	0	0	0	0	0	0	0	0	0	0	0	0	0	0	0	0	1.89835e-27	0	0	0	2.67929e-28	0	0	0	0
[Mt].Oxaloacetate	0	0	0	0	0	0	0	0	0	0	0	0	0	0	0	0	0	0	0	0	0	0	0	0	0	0	0	0	0	0	0	0	0	0	0	0	0	0	0	0	0.00425904	0	0	0	0.00102913	0	0	0	0
[Mt].[Citrate Synthase]	0	0	0	0	0	0	0	0	0	0	0	0	0	0	0	0	0	0	0	0	0	0	0	0	0	0	0	0	0	0	0	0	0	0	0	0	0	0	0	0	0	0	0	0	0	0	0	0	0
[Mt].[D-Isocitrate]	0	0	0	0	0	0	0	0	0	0	0	0	0	0	0	0	0	0	0	0	0	0	0	0	0	0	0	0	0	0	0	0	0	0	0	0	0	0	0	0	6.87788e-20	0	0	0	1.22482e-20	0	0	0	0
[Mt].Citrate	0	0	0	0	0	0	0	0	0	0	0	0	0	0	0	0	0	0	0	0	0	0	0	0	0	0	0	0	0	0	0	0	0	0	0	0	0	0	0	0	1.51604e-23	0	0	0	2.66959e-24	0	0	0	0
[Mt].Isocitratedehydrogenase	0	0	0	0	0	0	0	0	0	0	0	0	0	0	0	0	0	0	0	0	0	0	0	0	0	0	0	0	0	0	0	0	0	0	0	0	0	0	0	0	0	0	0	0	0	0	0	0	0
[Mt].Aconitase	0	0	0	0	0	0	0	0	0	0	0	0	0	0	0	0	0	0	0	0	0	0	0	0	0	0	0	0	0	0	0	0	0	0	0	0	0	0	0	0	0	0	0	0	0	0	0	0	0
[Mt].[α ketoglutarate]	0	0	0	0	0	0	0	0	0	0	0	0	0	0	0	0	0	0	0	0	0	0	0	0	0	0	0	0	0	0	0	0	0	0	0	0	0	0	0	0	5.58661e-17	0	0	0	1.00361e-17	0	0	0	0
[Mt].[α KG dehydrogenase]	0	0	0	0	0	0	0	0	0	0	0	0	0	0	0	0	0	0	0	0	0	0	0	0	0	0	0	0	0	0	0	0	0	0	0	0	0	0	0	0	0	0	0	0	0	0	0	0	0
[Mt].[Succinic dehydrogenase]	0	0	0	0	0	0	0	0	0	0	0	0	0	0	0	0	0	0	0	0	0	0	0	0	0	0	0	0	0	0	0	0	0	0	0	0	0	0	0	0	0	0	0	0	0	0	0	0	0
[Mt].[Succinyl CoA synthase]	0	0	0	0	0	0	0	0	0	0	0	0	0	0	0	0	0	0	0	0	0	0	0	0	0	0	0	0	0	0	0	0	0	0	0	0	0	0	0	0	0	0	0	0	0	0	0	0	0
[Mt].[Succinyl CoA]	0	0	0	0	0	0	0	0	0	0	0	0	0	0	0	0	0	0	0	0	0	0	0	0	0	0	0	0	0	0	0	0	0	0	0	0	0	0	0	0	4.33845e-14	0	0	0	7.92446e-15	0	0	0	0
[Mt].Succinate	0	0	0	0	0	0	0	0	0	0	0	0	0	0	0	0	0	0	0	0	0	0	0	0	0	0	0	0	0	0	0	0	0	0	0	0	0	0	0	0	3.16231e-11	0	0	0	5.95766e-12	0	0	0	0
[Mt].Fumarase	0	0	0	0	0	0	0	0	0	0	0	0	0	0	0	0	0	0	0	0	0	0	0	0	0	0	0	0	0	0	0	0	0	0	0	0	0	0	0	0	0	0	0	0	0	0	0	0	0
[Mt].Fumarate	0	0	0	0	0	0	0	0	0	0	0	0	0	0	0	0	0	0	0	0	0	0	0	0	0	0	0	0	0	0	0	0	0	0	0	0	0	0	0	0	2.05454e-08	0	0	0	4.08553e-09	0	0	0	0
[Mt].[Malate dehydrogenase]	0	0	0	0	0	0	0	0	0	0	0	0	0	0	0	0	0	0	0	0	0	0	0	0	0	0	0	0	0	0	0	0	0	0	0	0	0	0	0	0	0	0	0	0	0	0	0	0	0
[Mt].Malate	0	0	0	0	0	0	0	0	0	0	0	0	0	0	0	0	0	0	0	0	0	0	0	0	0	0	0	0	0	0	0	0	0	0	0	0	0	0	0	0	1.09504e-05	0	0	0	2.39069e-06	0	0	0	0
[Mt].[Phosphoenolpyruvate carboxylase]	0	0	0	0	0	0	0	0	0	0	0	0	0	0	0	0	0	0	0	0	0	0	0	0	0	0	0	0	0	0	0	0	0	0	0	0	0	0	0	0	0	0	0	0	0	0	0	0	0
[Mt].ROS	0	0	0	0	0	0	0	0	0	0	0	0	0	0	0	0	0	0	0	0	0	0	0	0	0	0	0	0	0	0	0	0	0	0	0	0	0	0	0	0	0	0	0	0	0	0	0	0	0
[Mt].NOX1	0	0	0	0	0	0	0	0	0	0	0	0	0	0	0	0	0	0	0	0	0	0	0	0	0	0	0	0	0	0	0	0	0	0	0	0	0	0	0	0	0	0	0	0	0	0	0	0	0
[Mt].NADPH	0	0	0	0	0	0	0	0	0	0	0	0	0	0	0	0	0	0	0	0	0	0	0	0	0	0	0	0	0	0	0	0	0	0	0	0	0	0	0	0	0	0	0	0	0	0	0	0	0
[Nu].[Inflammatory Cytokine Genes]	0	0	0	0	0	0	0	0	0	0	0	0	0	0	0	0	0	0	0	0	0	0	0	0	0	0	0	0	0	0	0	0	0	0	0	0	0	0	0	0	0	0	0	0	0	0	0	0	0
[Nu].[Insulin & IAPP Gene]	0	0	0	0	0	0	0	0	0	0	0	0	0	0	0	0	0	0	0	0	0	0	0	0	0	0	0	0	0	0	0	0	0	0	0	0	0	0	0	0	0	0	0	0	0	0	0	0	0
[Nu].[RAGE & NLRP3 genes]	0	0	0	0	0	0	0	0	0	0	0	0	0	0	0	0	0	0	0	0	0	0	0	0	0	0	0	0	0	0	0	0	0	0	0	0	0	0	0	0	0	0	0	0	0	0	0	0	0
[Nu].AP1	0	0	0	0	0	0	0	0	0	0	0	0	0	0	0	0	0	0	0	0	0	0	0	0	0	0	0	0	0	0	0	0	0	0	0	0	0	0	0	0	0	0	0	0	0	0	0	0	0
[Nu].NFkB	0	0	0	0	0	0	0	0	0	0	0	0	0	0	0	0	0	0	0	0	0	0	0	0	0	0	0	0	0	0	0	0	0	0	0	0	0	0	0	0	0	0	0	0	0	0	0	0	0
[Nu].PDX1	0	0	0	0	0	0	0	0	0	0	0	0	0	0	0	0	0	0	0	0	0	0	0	0	0	0	0	0	0	0	0	0	0	0	0	0	0	0	0	0	0	0	0	0	0	0	0	0	0
[Nu].STAT3	0	0	0	0	0	0	0	0	0	0	0	0	0	0	0	0	0	0	0	0	0	0	0	0	0	0	0	0	0	0	0	0	0	0	0	0	0	0	0	0	0	0	0	0	0	0	0	0	0
[ER].[Chaperon BiP]	0	0	0	0	0	0	0	0	0	0	0	0	0	0	0	0	0	0	0	0	0	0	0	0	0	0	0	0	0	0	0	0	0	0	0	0	0	0	0	0	0	0	0	0	0	0	0	0	0
[ER].[eIF4α]	0	0	0	0	0	0	0	0	0	0	0	0	0	0	0	0	0	0	0	0	0	0	0	0	0	0	0	0	0	0	0	0	0	0	0	0	0	0	0	0	0	0	0	0	0	0	0	0	0
[ER].[ER Stress]	0	0	0	0	0	0	0	0	0	0	0	0	0	0	0	0	0	0	0	0	0	0	0	0	0	0	0	0	0	0	0	0	0	0	0	0	0	0	0	0	0	0	0	0	0	0	0	0	0
[ER].[IRE1α]	0	0	0	0	0	0	0	0	0	0	0	0	0	0	0	0	0	0	0	0	0	0	0	0	0	0	0	0	0	0	0	0	0	0	0	0	0	0	0	0	0	0	0	0	0	0	0	0	0
[ER].ATF4	0	0	0	0	0	0	0	0	0	0	0	0	0	0	0	0	0	0	0	0	0	0	0	0	0	0	0	0	0	0	0	0	0	0	0	0	0	0	0	0	0	0	0	0	0	0	0	0	0
[ER].ATF6	0	0	0	0	0	0	0	0	0	0	0	0	0	0	0	0	0	0	0	0	0	0	0	0	0	0	0	0	0	0	0	0	0	0	0	0	0	0	0	0	0	0	0	0	0	0	0	0	0
[ER].PERK	0	0	0	0	0	0	0	0	0	0	0	0	0	0	0	0	0	0	0	0	0	0	0	0	0	0	0	0	0	0	0	0	0	0	0	0	0	0	0	0	0	0	0	0	0	0	0	0	0
[ER].proIAPP	0	0	0	0	0	0	0	0	0	0	0	0	0	0	0	0	0	0	0	0	0	0	0	0	0	0	0	0	0	0	0	0	0	0	0	0	0	0	0	0	0	0	0	0	0	0	0	0	0
[ER].proInsulin	0	0	0	0	0	0	0	0	0	0	0	0	0	0	0	0	0	0	0	0	0	0	0	0	0	0	0	0	0	0	0	0	0	0	0	0	0	0	0	0	0	0	0	0	0	0	0	0	0
[ER].REDD1	0	0	0	0	0	0	0	0	0	0	0	0	0	0	0	0	0	0	0	0	0	0	0	0	0	0	0	0	0	0	0	0	0	0	0	0	0	0	0	0	0	0	0	0	0	0	0	0	0
[ER].XBP1	0	0	0	0	0	0	0	0	0	0	0	0	0	0	0	0	0	0	0	0	0	0	0	0	0	0	0	0	0	0	0	0	0	0	0	0	0	0	0	0	0	0	0	0	0	0	0	0	0
[BC].[Methylglyoxal synthase]	0	0	0	0	0	0	0	0	0	0	0	0	0	0	0	0	0	0	0	0	0	0	0	0	0	0	0	0	0	0	0	0	0	0	0	0	0	0	0	0	0	0	0	0	0	0	0	0	0
[truncated: 88 more columns]

## Sheet: Time
	[BC].Insulin	[BC].[Insulin Receptor]	[BC].IRS1	[BC].SHP2	[BC].GRB2	[BC].PI3K	[BC].PIP2	[BC].PIP3	[BC].RAS	[BC].RAF	[BC].MEK	[BC].[ERK1/2]	[BC].AKT	[BC].mTORC1	[BC].[4EBP1]	[BC].eIF4E	[BC].[Ribosomal S6]	[BC].S6K	[BC].Rheb	[BC].[TSC1/2]	[BC].[Protein Synthesis]	[BC].GSK3B	[BC].[IKKab (NEMO)]	[BC].IKab	[BC].[Inhibition of Glycogen Breakdown]	[BC].GLUT4	[BC].GLUCOSE	[BC].[Glucose-6-Phosphate]	[BC].Hexokinase	[BC].[1, 3-bisphosphoglycerate]	[BC].[Phosphoglucose isomerase]	[BC].[Fructose bisphosphate aldolase]	[BC].[Fructose 1,6-bisphosphate]	[BC].[Fructose-6-Phosphate]	[BC].Phosphofructokinase	[BC].[2-Phosphoglycerate]	[BC].[3-Phosphoglycerate]	[BC].[Gleceraldehyde 3-phosphate]	[BC].[Phosphoglycerate kinase]	[BC].[Phosphoglycerate mutase]	[BC].Phosphoenolpyruvate	DHAP	[BC].[Glyceraldehyde 3-P dehydrogenase]	[BC].Enolase	[BC].PYRUVATE	[BC].[Pyruvate dehydrogenase]	[BC].[Pyruvate kinase]	[BC].[CTR-RAMP3]	[BC].[Adenylyl Cyclase]
[BC].Insulin			100	100	100	100	100	100	100	100	100	100	100													100	100	100		100			100	100		100	100	100			100	100			100
[BC].[Insulin Receptor]			100	100	100	100	100	100	100	100	100	100	100													100	100	100		100			100	100		100	100	100			100	100			100
[BC].IRS1				100	100	100	100	100	100	100	100	100	100													100	100	100		98.1656			100	100		100	100	100			100	100			100
[BC].SHP2						100	100	100					100													100	100	100		100			100	100		100	100	100			100	100			100
[BC].GRB2									100	100	100	100
[BC].PI3K							100	100					100													100	100	100		99.5949			100	100		100	100	100			100	100			100
[BC].PIP2								100					100													100	100	100		100			100	100		100	100	100			100	100			100
[BC].PIP3													100													100	100	100		100			100	100		100	100	100			100	100			100
[BC].RAS										100	100	100
[BC].RAF											100	100
[BC].MEK												100
[BC].[ERK1/2]
[BC].AKT																										100	100	100		97.4495			100	97.8129		100	100	100			100	100			100
[BC].mTORC1																	100	100			100
[BC].[4EBP1]																100					100
[BC].eIF4E																					100
[BC].[Ribosomal S6]																					100
[BC].S6K																	100				100
[BC].Rheb														100			100	100			100
[BC].[TSC1/2]														100			100	100	98.2525		100
[BC].[Protein Synthesis]
[BC].GSK3B																									100
[BC].[IKKab (NEMO)]																								98.0544
[BC].IKab
[BC].[Inhibition of Glycogen Breakdown]
[BC].GLUT4																											100	100		97.6312			100	97.4495		100	100	100			100	100			100
[BC].GLUCOSE																												100		98.8176			100	95.1906		100	100	100			100	100			100
[BC].[Glucose-6-Phosphate]																														100			100	87.079		100	100	100			100	100			100
[BC].Hexokinase
[BC].[1, 3-bisphosphoglycerate]																																				100	100				100				100
[BC].[Phosphoglucose isomerase]
[BC].[Fructose bisphosphate aldolase]
[BC].[Fructose 1,6-bisphosphate]																														94.7012						100	100	100			100	100			100
[BC].[Fructose-6-Phosphate]																														100			100			100	100	100			100	100			100
[BC].Phosphofructokinase
[BC].[2-Phosphoglycerate]																																									92.0076				100
[BC].[3-Phosphoglycerate]																																				100					96.489				100
[BC].[Gleceraldehyde 3-phosphate]																														86.9115						100	100				100				100
[BC].[Phosphoglycerate kinase]
[BC].[Phosphoglycerate mutase]
[BC].Phosphoenolpyruvate																																													100
[BC].DHAP
[BC].[Glyceraldehyde 3-P dehydrogenase]
[BC].Enolase
[BC].PYRUVATE																																									100
[BC].[Pyruvate dehydrogenase]
[BC].[Pyruvate kinase]
[BC].[CTR-RAMP3]																																																	100
[BC].[Adenylyl Cyclase]
[BC].[GαS/GαQ]																																																	100
[BC].[Secretory Granules]
[BC].[hIAPP monomer]
[BC].[Amyloid Fibrils]									100	100	100	100																																					100
[BC].RAGE									100	100	100	100
[BC].PKC									100	100	100	100
[BC].MAPK
[BC].[Ca+]
[BC].[Caspase 1]
[BC].[Caspase 2]
[BC].[Caspase 3/6/7]
[BC].[Caspase 8]
[BC].[Caspase 9]
[BC].[Caspase 10]
[BC].Calpain
[BC].cAMP
[BC].Procaspases
[BC].ATP
[BC].Inflammasome
[BC].[Ubiquitin Ligases]
[BC].[Insulin Resistance]
[BC].[Closure of K+ Channels]
[BC].LYSOSOMES
[BC].[Depletion of Lysosome]
[BC].[Polyubiquitinated Proteins]
[BC].Methylglyoxal
[BC].[Sorbitol Dehydrogenase]
[BC].Sorbitol																														97.6723			100			100	100	100			100	100			100
[BC].ULK1
[BC].[AUTOPHAGY DEFECT]
[BC].FADD
[BC].FAS
[BC].BID
[BC].PARP
[BC].APAF1
[BC].CytoC
[BC].[IL1β]
[BC].IL6
[BC].IL18
[BC].[TNFα]
[BC].[Beta Cell Death]
[BC].TFEB
[BC].p62
[BC].JAK
[BC].JNK
[BC].FLIP
[BC].[Aldose Reductase]
[BC].NLRP3
[Mt].[Acetyl CoA]																																									100				100
[Mt].Oxaloacetate																																									95.1435				100
[Mt].[Citrate Synthase]
[Mt].[D-Isocitrate]																																									100				100
[Mt].Citrate																																									100				100
[Mt].Isocitratedehydrogenase
[Mt].Aconitase
[Mt].[α ketoglutarate]																																									100				100
[Mt].[α KG dehydrogenase]
[Mt].[Succinic dehydrogenase]
[Mt].[Succinyl CoA synthase]
[Mt].[Succinyl CoA]																																									100				100
[Mt].Succinate																																									100				100
[Mt].Fumarase
[Mt].Fumarate																																									100				100
[Mt].[Malate dehydrogenase]
[Mt].Malate																																									98.9027				100
[Mt].[Phosphoenolpyruvate carboxylase]
[Mt].ROS
[Mt].NOX1
[Mt].NADPH
[Nu].[Inflammatory Cytokine Genes]
[Nu].[Insulin & IAPP Gene]
[Nu].[RAGE & NLRP3 genes]
[Nu].AP1
[Nu].NFkB
[Nu].PDX1
[Nu].STAT3
[ER].[Chaperon BiP]
[ER].[eIF4α]
[ER].[ER Stress]
[ER].[IRE1α]
[ER].ATF4
[ER].ATF6
[ER].PERK
[ER].proIAPP
[ER].proInsulin
[ER].REDD1
[ER].XBP1
[BC].[Methylglyoxal synthase]
[truncated: 87 more columns]

## Sheet: PCA_Score Coefficient
-7.96874e-19	-7.75853e-19	-6.59396e-19	-3.21038e-20	-2.9539e-18	-4.94427e-18	7.72231e-17	3.84943e-21	-1.61971e-19	-1.05289e-18	-1.36726e-18	1.38818e-19	2.15635e-18	-6.86073e-18	1.04198e-17	-4.48713e-20	-7.22714e-20	-4.08447e-19	-4.29853e-19	-6.18725e-19	-1.67103e-19	-7.42115e-19	-9.86457e-19	-1.09698e-18	-4.6778e-20	-5.50851e-19	-2.64618e-18	-5.96939e-18	-6.44997e-18	-1.33563e-17	-1.21602e-17	-1.47297e-17	-1.46032e-17	-1.01502e-17	-2.66175e-17	-2.2129e-17	-2.521e-17	-2.61015e-17	-2.56014e-17	-4.19045e-17	-1.96226e-18	4.746e-18	-6.44103e-17	-3.43449e-17	-2.77202e-17	-3.62769e-17	-2.71269e-17	-8.42291e-18	2.40104e-22	-4.87202e-18
2.63678e-16	5.20417e-17	-7.80626e-17	1.15793e-16	-2.56739e-16	1.38778e-17	1.11022e-16	-6.27956e-17	-2.66714e-17	1.04083e-17	1.21431e-17	-3.70797e-17	-1.73472e-17	5.55112e-17	4.16334e-17	-1.14031e-16	2.31477e-17	6.57027e-17	1.63443e-16	1.3108e-16	1.57385e-16	2.01228e-16	-1.27285e-16	5.12936e-16	7.32499e-16	-1.79639e-16	-4.00613e-17	-1.59333e-15	1.04509e-15	5.61454e-16	3.40819e-16	6.97481e-17	-9.71987e-17	-4.14563e-15	6.73596e-15	-1.32916e-16	-1.47736e-16	6.94635e-17	7.42181e-15	1.13874e-15	-4.97629e-15	1.44749e-15	-5.0409e-15	-5.30038e-16	-2.31511e-15	-1.38957e-15	-1.61013e-15	9.294e-15	3.18257e-16	3.10816e-15
-0.00890188	-0.00899449	-0.00767367	-0.000374566	-0.0345767	-0.058665	0.982774	5.03511e-05	-0.00211884	-0.0137849	-0.0179243	0.00182097	0.0283392	-0.0908595	0.139859	0.00762875	0.00512594	0.00479014	0.00393051	0.00374683	0.000749854	0.00244904	0.0029615	0.0018811	7.4019e-05	0.000444152	0.00208647	0.00049631	0.00015647	0.00031512	0.000187235	0.000204565	0.000155033	9.44619e-05	0.000241192	0.000167749	0.000140174	0.000120808	9.4172e-05	0.000132179	5.24114e-06	-1.26295e-05	0.00016634	5.56576e-05	4.30534e-05	5.46467e-05	3.8638e-05	1.13874e-05	-3.20754e-10	6.49081e-06
-9.57969e-07	-8.2366e-07	-6.90279e-07	-3.32876e-08	-3.02533e-06	-4.80075e-06	5.28349e-05	2.1803e-09	-9.16596e-08	-5.92032e-07	-7.60965e-07	7.68908e-08	1.17676e-06	-3.51284e-06	4.7142e-06	-2.7614e-06	-2.06279e-06	-3.60579e-06	-3.42491e-06	-4.29351e-06	-1.07231e-06	-4.4689e-06	-5.84248e-06	-6.0276e-06	-2.54977e-07	-2.82256e-06	-1.35411e-05	-2.95409e-05	-3.17959e-05	-6.58384e-05	-5.99134e-05	-7.25671e-05	-7.19324e-05	-4.99953e-05	-0.000131104	-0.000108992	-0.000124165	-0.00012856	-0.000126108	-0.000206431	-9.67552e-06	2.33861e-05	-0.000317353	-0.00016931	-0.000136661	-0.000178855	-0.000133755	-4.15351e-05	1.18403e-09	-2.40256e-05
-9.57969e-07	-8.2366e-07	-6.90279e-07	-3.32876e-08	-3.02533e-06	-4.80075e-06	5.28349e-05	2.1803e-09	-9.16596e-08	-5.92032e-07	-7.60965e-07	7.68908e-08	1.17676e-06	-3.51284e-06	4.7142e-06	-2.7614e-06	-2.06279e-06	-3.60579e-06	-3.42491e-06	-4.29351e-06	-1.07231e-06	-4.4689e-06	-5.84248e-06	-6.0276e-06	-2.54977e-07	-2.82256e-06	-1.35411e-05	-2.95409e-05	-3.17959e-05	-6.58384e-05	-5.99134e-05	-7.25671e-05	-7.19324e-05	-4.99953e-05	-0.000131104	-0.000108992	-0.000124165	-0.00012856	-0.000126108	-0.000206431	-9.67552e-06	2.33861e-05	-0.000317353	-0.00016931	-0.000136661	-0.000178855	-0.000133755	-4.15351e-05	1.18403e-09	-2.40256e-05
-0.000451255	-0.000318335	-0.000259701	-1.22878e-05	-0.00108885	-0.00152908	-0.00095714	-5.59271e-07	2.36226e-05	0.000157853	0.000213841	-2.21298e-05	-0.000363685	0.00141861	-0.00285772	-0.00328487	-0.00243761	-0.00427085	-0.00410461	-0.00533527	-0.00139515	-0.00626015	-0.00843642	-0.01188	-0.000542088	-0.547465	0.836599	0.00350706	0.00102601	0.0020376	0.0012093	0.00131972	0.000998787	0.00060872	0.00155447	0.0010831	0.00091292	0.000796075	0.000643144	0.000975447	-0.00140395	0.000525729	8.89066e-05	0.000323363	0.000251374	0.000320045	0.000227376	6.72608e-05	-1.89602e-09	3.83745e-05
-2.76671e-05	-1.94706e-05	-1.58804e-05	-7.51263e-07	-6.65566e-05	-9.33847e-05	-5.85363e-05	-3.39842e-08	1.43541e-06	9.59131e-06	1.2992e-05	-1.34445e-06	-2.20921e-05	8.61309e-05	-0.000173364	-0.000187476	-0.000138229	-0.00022865	-0.000215345	-0.000266653	-6.61403e-05	-0.0002744	-0.000358478	-0.000372208	-1.58019e-05	-0.00117324	0.000748268	-0.00172741	-0.00259852	-0.00261188	-0.00408301	-0.00507069	-0.0054391	-0.00397105	-0.0105293	-0.00953792	-0.0135523	-0.017246	-0.0261333	-0.0765135	0.780389	-0.328777	0.5216	0.0147968	0.010756	0.0131043	0.00865581	0.00241103	-6.70966e-08	0.00135409
-8.05449e-05	-5.66829e-05	-4.62311e-05	-2.18708e-06	-0.00019376	-0.000271862	-0.00017043	-9.89357e-08	4.17882e-06	2.79225e-05	3.78226e-05	-3.914e-06	-6.43151e-05	0.000250746	-0.000504701	-0.000545684	-0.000402327	-0.000665241	-0.000626411	-0.000775227	-0.000192136	-0.000795935	-0.00103908	-0.00106752	-4.51598e-05	-0.000518143	-0.00244034	0.00278601	-0.335652	0.941281	0.0183963	0.0170665	0.00975041	0.00540911	0.0135841	0.00859516	0.006402	0.00526107	0.00393095	0.0054472	-0.00112162	6.31219e-05	0.00562394	0.00205851	0.00158843	0.00201249	0.00141762	0.000433273	-1.18075e-08	0.000238703
-0.000456076	-0.000323862	-0.000264854	-1.25623e-05	-0.00111871	-0.00146954	-0.000964139	-5.80459e-07	2.45509e-05	0.000166533	0.000252976	9.54657e-05	-0.000349094	0.00141271	-0.00286188	-0.0033076	-0.00246673	-0.00430547	-0.00413876	-0.00538247	-0.00140834	-0.0063253	-0.00852761	-0.0120651	-0.000551289	0.836807	0.547141	0.00349502	0.00101283	0.00204127	0.00120002	0.00130848	0.000987377	0.000600572	0.00153299	0.00106413	0.000886893	0.000763458	0.000594426	0.000833802	3.30276e-05	-7.9616e-05	0.00104859	0.000350524	0.00027113	0.000344127	0.000243302	7.17027e-05	-2.01967e-09	4.08702e-05
-4.60678e-06	-3.24282e-06	-2.64514e-06	-1.25148e-07	-1.10895e-05	-1.5517e-05	-9.74491e-06	-5.66455e-09	2.39272e-07	1.59983e-06	2.17851e-06	-1.74628e-07	-3.67049e-06	1.43315e-05	-2.88529e-05	-3.1193e-05	-2.30028e-05	-3.80256e-05	-3.58072e-05	-4.43218e-05	-1.09889e-05	-4.55616e-05	-5.9507e-05	-6.16255e-05	-2.61456e-06	0.000191005	1.08818e-05	-0.000281585	-0.000261342	-0.000614186	-0.000572905	-0.000694504	-0.000689883	-0.000479746	-0.0012597	-0.00104862	-0.00119897	-0.00124479	-0.00122613	-0.00201387	-9.47201e-05	0.000229116	-0.00311218	-0.00168934	-0.00136635	-0.00179093	-0.00134324	-0.000418317	1.1933e-08	-0.000242175
-8.11154e-05	-5.70842e-05	-4.65585e-05	-2.20257e-06	-0.000195132	-0.000273786	-0.000171636	-9.96357e-08	4.20839e-06	2.81201e-05	3.80903e-05	-3.94124e-06	-6.47701e-05	0.00025252	-0.000508271	-0.000549519	-0.000405154	-0.000669886	-0.000630777	-0.000780604	-0.000193462	-0.000801386	-0.00104618	-0.00107462	-4.54582e-05	-0.000512138	-0.00246606	-0.00724359	0.941711	0.334538	0.0179789	0.0169021	0.0102141	0.010362	0.00469816	0.00799499	0.00616614	0.00508993	0.0038301	0.00521187	0.000202135	-0.00048708	0.00639355	0.00205198	0.00158273	0.00200493	0.00141265	0.00041506	-1.16833e-08	0.000236387
-5.03277e-05	-3.54159e-05	-2.88855e-05	-1.3665e-06	-0.000121061	-0.000169856	-0.000106474	-6.18065e-08	2.61057e-06	1.74435e-05	2.36282e-05	-2.44512e-06	-4.01783e-05	0.000156642	-0.000315284	-0.000340459	-0.000250985	-0.000414538	-0.000390195	-0.00048247	-0.000119469	-0.000494282	-0.00064497	-0.000659976	-2.78972e-05	-0.000312449	-0.00149939	-0.00357751	0.00414179	-0.00799811	-0.0155469	-0.0225582	-0.0571445	-0.493324	0.86502	0.0539002	0.0202406	0.014069	0.00253649	0.0109184	0.000408544	-0.000983695	0.0128234	0.00378233	0.00290101	0.00366063	0.00256191	0.000748311	-2.10364e-08	0.000425504
-0.000151912	-0.000106927	-8.72128e-05	-4.12588e-06	-0.000365529	-0.000512904	-0.000321647	-1.86741e-07	7.88754e-06	5.2704e-05	7.13909e-05	-7.38778e-06	-0.000121398	0.00047331	-0.000952732	-0.00103499	-0.000763463	-0.00126773	-0.00119545	-0.00148442	-0.000369192	-0.00153688	-0.00201007	-0.00209743	-8.9002e-05	-0.00104746	-0.00503764	0.999866	0.00751272	-0.000773589	0.00422822	0.00454562	0.00331756	0.00199054	0.0050679	0.00346445	0.00282969	0.00241479	0.0018655	0.00260804	0.000106113	-0.000249911	0.00327768	0.00114228	0.000902614	0.00117552	0.000938343	-0.00142014	2.04912e-10	1.65918e-05
-0.0195528	-0.0949579	-0.191624	-0.696958	0.64905	0.176302	0.0221161	9.89096e-06	-0.000417381	-0.00276998	-0.00371219	0.000382261	0.00618831	-0.0227509	0.0416784	0.00551735	0.00373346	0.00360926	0.00297131	0.00287452	0.000581087	0.00192451	0.00234122	0.00188972	-0.113524	0.000329081	0.00154803	0.000377798	0.000119283	0.000240233	0.000142774	0.000155996	0.000118238	7.20473e-05	0.000183962	0.000127956	0.000106938	9.2173e-05	7.18606e-05	0.000100874	3.99849e-06	-9.63884e-06	0.000126964	4.25045e-05	3.28809e-05	4.17368e-05	2.95126e-05	8.69867e-06	-2.45025e-10	4.95837e-06
-8.27181e-25	1.30104e-18	0	1.11022e-16	-8.67362e-19	1.0842e-19	-1.35525e-20	-4.44523e-17	-6.245e-17	-9.71445e-17	2.08167e-17	1.08854e-16	-8.32667e-17	-2.08167e-17	-2.60209e-18	1.38778e-17	-1.66533e-16	1.66533e-16	1.14492e-16	-2.22045e-16	7.63278e-17	-3.50414e-16	-4.11129e-16	1.77636e-15	-4.68375e-16	1.7486e-15	-1.05471e-15	-3.4972e-15	-5.8703e-15	3.89966e-15	-3.46945e-16	3.19189e-16	6.45317e-16	3.93782e-15	-7.27196e-15	-1.04777e-15	-8.60423e-16	-3.19189e-16	-4.64906e-15	-7.70217e-16	-3.16804e-15	2.95944e-15	-4.996e-15	-1.4086e-15	-2.05044e-15	-8.95117e-16	-7.63278e-17	1.86847e-14	1.61267e-15	4.12864e-16
-0.000644092	-0.000456351	-0.000372461	-1.76284e-05	-0.00156266	-0.00219786	-0.00139472	-8.13396e-07	3.43567e-05	0.0002296	0.000311074	-3.21942e-05	-0.000529182	0.00206576	-0.00416718	-0.00571931	-0.00438105	0.0520919	-0.00447668	-0.00688071	-0.00222177	-0.0125416	-0.0185768	0.998159	0.00382689	0.00354596	0.0163265	0.00212013	0.000643061	0.00129453	0.000765103	0.000835105	0.000631555	0.000384481	0.000981547	0.000682006	0.000569138	0.000490199	0.000381869	0.000535786	2.12273e-05	-5.11706e-05	0.000673965	0.000225328	0.000174288	0.00022121	0.000156393	4.60885e-05	-1.29818e-09	2.62699e-05
-0.00119074	-0.000853191	-0.00069859	-4.23286e-05	-0.00291593	-0.00412584	-0.00266722	-1.56632e-06	6.6161e-05	0.000442234	0.000599359	-6.20395e-05	-0.00102023	0.00399028	-0.00807625	-0.0157223	-0.0126307	-0.0390142	0.998037	0.038184	0.00474437	0.0115986	0.0131187	0.00685833	0.000280182	0.00126681	0.00593103	0.00123012	0.000383581	0.000772412	0.000458237	0.000500507	0.000379078	0.000230915	0.000589572	0.000409927	0.000342401	0.000295035	0.000229934	0.000322689	1.27874e-05	-3.08255e-05	0.000406016	0.000135803	0.000105046	0.000133329	9.42655e-05	2.77806e-05	-7.82505e-10	1.58348e-05
-3.45892e-06	-6.91068e-06	-1.19312e-05	-3.84896e-05	3.00567e-05	1.68474e-06	-3.81728e-06	-2.3783e-09	1.00476e-07	6.72412e-07	9.13017e-07	-9.45859e-08	-1.55936e-06	6.15523e-06	-1.26157e-05	-1.5793e-05	-1.16611e-05	-1.9408e-05	-1.6725e-05	-2.25043e-05	-5.58051e-06	-2.30829e-05	-3.01062e-05	-2.9765e-05	-0.000319268	-1.46495e-05	-7.02728e-05	-0.00015002	-0.000161449	-0.00033431	-0.000304322	-0.000368637	-0.000365549	-0.000254127	-0.000666439	-0.000554246	-0.000631953	-0.000654756	-0.000642924	-0.00105331	-4.93818e-05	0.00011944	-0.00162136	-0.000868735	-0.000701565	-0.000918516	-0.0006874	-0.000213609	6.09033e-09	-0.000123586
-0.00225542	-0.01087	-0.0219184	-0.0796779	0.0741518	0.0200868	0.00248514	1.1056e-06	-4.66533e-05	-0.000309569	-0.000414765	4.27053e-05	0.000691099	-0.00253709	0.00463609	0.000474309	0.000309992	0.00019539	8.99994e-05	2.94203e-05	-1.78535e-05	-0.000212913	-0.000353792	-0.0036664	0.993527	0.000185267	0.000854047	0.000123344	3.78008e-05	7.61026e-05	4.50172e-05	4.91391e-05	3.71586e-05	2.26176e-05	5.7738e-05	4.01013e-05	3.34254e-05	2.87604e-05	2.23676e-05	3.13395e-05	1.23939e-06	-2.98755e-06	3.93346e-05	1.30521e-05	1.00866e-05	1.27935e-05	9.03328e-06	2.6587e-06	-7.48651e-11	1.51487e-06
0	-2.64698e-23	0	1.35525e-20	2.11758e-22	0	4.23516e-22	-1.52656e-16	-2.22045e-16	0	2.22045e-16	-1.11022e-16	2.77556e-17	3.46945e-18	1.0842e-19	2.77556e-17	-8.32667e-17	9.02056e-17	-9.71445e-17	-8.32667e-17	-5.55112e-17	1.21431e-16	1.11022e-16	-2.498e-16	-1.91687e-16	1.21431e-16	1.38778e-17	1.25594e-15	-1.39472e-15	1.1692e-15	-1.83881e-16	2.32453e-16	-2.08167e-16	-1.00614e-16	8.95117e-16	5.93275e-16	4.82253e-16	4.64906e-16	3.72966e-16	1.32706e-15	-3.56583e-15	4.88043e-15	-5.96051e-15	1.09288e-16	1.76074e-16	2.84495e-16	4.08527e-16	-1.47972e-15	-2.81851e-17	-3.88253e-16
-0.00147663	-0.00105949	-0.000865847	-4.10423e-05	-0.00363974	-0.00514257	-0.0033395	-1.96484e-06	8.2995e-05	0.000554789	0.000751973	-7.78397e-05	-0.00128023	0.00500984	-0.0101492	-0.0226508	-0.0187211	0.99679	0.0370304	0.0302349	0.00449942	0.0122505	0.0143116	-0.0516075	3.64646e-05	0.00117511	0.00552122	0.0012453	0.000389997	0.00078537	0.000466196	0.000509256	0.000385794	0.000235027	0.000600082	0.000417278	0.00034859	0.000300388	0.000234121	0.000328577	1.30212e-05	-3.1389e-05	0.00041344	0.000138295	0.000106974	0.000135776	9.59966e-05	2.82909e-05	-7.96878e-10	1.61257e-05
0	0	0	0	0	-2.58494e-26	3.30872e-24	-6.93889e-18	2.77556e-16	-5.55112e-17	2.08167e-17	-4.16334e-17	5.20417e-18	1.0842e-19	3.38813e-21	6.93889e-18	0	-2.77556e-17	-2.22045e-16	0	1.249e-16	2.77556e-16	-2.498e-16	1.11022e-16	-1.04083e-16	-1.83881e-16	0	1.38778e-17	4.0714e-15	-1.15186e-15	4.16334e-17	4.96131e-16	-1.42247e-16	2.01575e-15	-3.64986e-15	-7.00828e-16	-3.67761e-16	-3.33067e-16	1.21084e-15	8.67362e-17	2.7207e-15	2.21568e-15	-2.44943e-15	5.91541e-16	5.9848e-16	1.01828e-15	1.96891e-15	-1.56273e-14	-1.7641e-16	-9.02707e-16
0	-1.29247e-26	0	0	5.16988e-26	-1.29247e-26	6.61744e-24	-7.63278e-17	0	-1.11022e-16	0	0	-1.04083e-17	5.42101e-20	0	3.46945e-18	-3.46945e-18	5.55112e-17	-2.22045e-16	2.22045e-16	0	-2.91434e-16	-1.38778e-17	4.44089e-16	3.29597e-17	-3.98986e-17	-3.26128e-16	2.19269e-15	3.46945e-18	-1.26635e-16	1.99493e-16	5.89806e-17	4.68375e-16	-1.89085e-16	1.07553e-15	-5.20417e-17	-4.44089e-16	-5.37764e-16	3.83547e-15	-2.67147e-16	-5.19246e-15	-1.37347e-15	2.60209e-16	-3.38271e-16	-1.26635e-16	-1.99493e-17	4.45824e-16	-1.37954e-15	2.83536e-16	2.57715e-16
-0.00524517	-0.00478825	-0.00402575	-0.00019446	-0.0176999	-0.0279921	-0.0469379	-7.15449e-05	0.00304203	0.0213656	0.0314911	-0.00339786	-0.0642095	0.645206	0.751994	0.00705972	0.00478373	0.005014	0.00434912	0.00493398	0.00132957	0.0142337	-0.0943931	-0.000141307	8.77632e-07	0.00013936	0.000664093	0.000223828	7.18532e-05	0.000144736	8.62062e-05	9.42269e-05	7.14787e-05	4.35685e-05	0.000111252	7.74082e-05	6.47195e-05	5.57915e-05	4.35005e-05	6.10638e-05	2.42038e-06	-5.83461e-06	7.6853e-05	2.57174e-05	1.98934e-05	2.52501e-05	1.78529e-05	5.26155e-06	-1.48204e-10	2.99908e-06
-0.00557779	-0.00522924	-0.00441305	-0.000213738	-0.0195241	-0.031419	-0.0725499	-0.703685	-0.442586	-0.351633	-0.198796	0.0161902	0.161114	-0.240642	0.234189	0.0059825	0.00400974	0.00370566	0.00303505	0.00288493	0.000576295	0.0018791	0.00227128	0.00143953	5.66296e-05	0.000340504	0.0015996	0.000378594	0.000119338	0.000240338	0.000142796	0.000156012	0.000118232	7.20382e-05	0.000183936	0.000127925	0.000106892	9.21206e-05	7.1806e-05	0.000100782	3.99411e-06	-9.62826e-06	0.00012682	4.24258e-05	3.28173e-05	4.16535e-05	2.94501e-05	8.67925e-06	-2.44471e-10	4.94713e-06
-1.93695e-05	-1.36302e-05	-1.11168e-05	-5.25907e-07	-4.65913e-05	-6.537e-05	-4.09752e-05	-2.37852e-08	1.00463e-06	6.71285e-06	9.09291e-06	-9.40963e-07	-1.54619e-05	6.02807e-05	-0.00012133	-0.000130945	-9.65266e-05	-0.000159348	-0.000149966	-0.000185359	-4.588e-05	-0.000189714	-0.0002475	-0.000252821	-1.06831e-05	-0.000119159	-0.000571708	0.000541377	-0.00134949	-0.00285607	-0.00266219	-0.00325957	-0.00334452	-0.00237401	-0.00625453	-0.00538603	-0.0066653	-0.0073815	-0.00810966	-0.0147032	-0.000807212	0.00192784	-0.0271275	-0.0421718	-0.0437786	-0.0728255	-0.112686	0.929119	-3.59627e-06	0.061009
-1.84996e-05	-1.3018e-05	-1.06175e-05	-5.02285e-07	-4.44986e-05	-6.24337e-05	-3.91344e-05	-2.27166e-08	9.59499e-07	6.41127e-06	8.6844e-06	-8.98689e-07	-1.47673e-05	5.75725e-05	-0.000115879	-0.000125049	-9.21797e-05	-0.000152159	-0.000143195	-0.000176974	-4.38024e-05	-0.000181105	-0.000236258	-0.000241257	-1.01938e-05	-0.000113603	-0.000545026	-0.00117884	-0.00132038	-0.00273841	-0.00256961	-0.00314302	-0.00321537	-0.00227847	-0.00600062	-0.00515323	-0.00633704	-0.00698244	-0.00761048	-0.0137442	-0.00275132	-7.43355e-05	-0.0225312	-0.0303311	-0.0290542	-0.0442148	-0.048464	0.0109639	6.78718e-07	-0.0150341
-1.90719e-05	-1.34208e-05	-1.0946e-05	-5.17827e-07	-4.58755e-05	-6.43657e-05	-4.03459e-05	-2.34199e-08	9.89205e-07	6.60976e-06	8.95328e-06	-9.26513e-07	-1.52245e-05	5.9355e-05	-0.000119467	-0.000128945	-9.50537e-05	-0.000156951	-0.000147739	-0.000180216	-4.51464e-05	-0.000186741	-0.000243631	-0.000248902	-1.05177e-05	-0.000117315	-0.00056286	-0.00123905	-0.00144936	-0.0030116	-0.00293981	-0.00364363	-0.00389718	-0.00284294	-0.007537	-0.00682177	-0.00968166	-0.0123104	-0.0186176	-0.054272	-0.43686	-0.391181	0.392293	0.0107061	0.00779702	0.00951866	0.00633167	0.00169557	-4.97309e-08	0.00100688
0	0	3.85186e-34	0	0	1.92593e-34	0	0	0	0	0	0	0	0	0	0	0	0	1.0842e-19	0	6.93889e-18	0	0	-3.46945e-18	5.55112e-17	1.11022e-16	-2.77556e-17	-5.55112e-17	-1.80411e-15	2.10942e-15	-8.32667e-17	-2.77556e-17	-6.73073e-16	-1.76942e-16	-9.12465e-16	-7.54605e-16	-5.68989e-16	-4.30211e-16	-3.1225e-16	-4.16334e-17	2.86229e-16	4.02282e-15	-5.27356e-15	-8.32667e-16	-6.245e-16	-6.80012e-16	-7.84095e-16	4.64212e-15	1.27369e-16	9.28077e-17
-5.90722e-07	-4.15685e-07	-3.39034e-07	-1.60388e-08	-1.42092e-06	-1.99361e-06	-1.24964e-06	-7.25385e-10	3.06387e-08	2.04724e-07	2.7731e-07	-2.86969e-08	-4.71547e-07	1.8384e-06	-3.70024e-06	-3.97385e-06	-2.94101e-06	-4.85825e-06	-4.5725e-06	-5.61716e-06	-1.42214e-06	-5.7811e-06	-7.5417e-06	-7.70116e-06	-3.25395e-07	-3.62584e-06	-1.73954e-05	-3.7618e-05	-4.18611e-05	-8.68054e-05	-8.13802e-05	-9.95484e-05	-0.000102112	-7.25821e-05	-0.000191316	-0.000165727	-0.000211722	-0.000246667	-0.000320538	-0.000810578	-0.00525645	-0.00468224	0.00447005	-7.34525e-07	-1.06157e-05	-2.19294e-05	-2.53791e-05	-1.19263e-05	2.92747e-10	-5.92827e-06
0	0	5.87747e-39	3.76158e-37	0	0	3.85186e-34	-1.69407e-21	0	0	0	-1.32349e-23	0	-1.00974e-28	0	4.1359e-25	0	0	0	0	0	0	0	6.93889e-18	-1.11022e-16	1.11022e-16	0	8.32667e-17	-2.69229e-15	-4.16334e-16	3.88578e-16	4.3715e-16	-2.84495e-16	-2.1684e-15	4.19109e-15	3.97252e-16	5.20417e-17	-2.44596e-16	-6.9042e-16	-6.80012e-16	-2.00751e-15	-1.62457e-15	1.11716e-15	-1.76942e-16	-1.83881e-16	-6.10623e-16	-7.63278e-16	-3.88578e-16	-2.94697e-16	-5.50341e-16
0	-1.14794e-41	1.83671e-40	-1.02856e-38	6.88766e-41	-1.14794e-41	0	1.65436e-24	0	0	0	1.29247e-26	0	0	0	0	0	0	0	0	0	0	-1.35525e-20	0	-3.46945e-18	0	0	0	-1.11022e-16	1.11022e-16	1.11022e-16	-3.88578e-16	-3.88578e-16	2.77556e-17	0	-1.38778e-16	8.32667e-17	-9.71445e-17	6.34909e-16	-3.20924e-17	2.1181e-15	3.03577e-17	4.92661e-16	2.35922e-16	1.52656e-16	1.73472e-16	-2.77556e-16	2.27075e-15	4.19812e-17	1.89952e-16
-0.00110071	-0.000784704	-0.000640855	-3.0344e-05	-0.00269127	-0.00379358	-0.00243412	-1.42551e-06	6.02125e-05	0.00040244	0.000545355	-5.64461e-05	-0.000928076	0.00362708	-0.00733141	-0.0119716	-0.00931348	-0.0295421	-0.0404131	0.998051	0.0108739	0.0193098	0.0207498	0.00859055	0.000325215	0.00158457	0.00740957	0.00147047	0.00045741	0.000921081	0.000546707	0.000595068	0.000452363	0.000275666	0.000703893	0.000489743	0.000409744	0.000353553	0.000276206	0.000388548	1.74147e-05	-3.54283e-05	0.000488547	0.000166753	0.000129341	0.000164527	0.00011686	3.46164e-05	-9.76321e-10	1.97629e-05
-4.61795e-07	-3.24959e-07	-2.65038e-07	-1.25382e-08	-1.11079e-06	-1.55849e-06	-9.76882e-07	-5.67056e-10	2.39512e-08	1.60039e-07	2.16782e-07	-2.24332e-08	-3.68623e-07	1.43713e-06	-2.89259e-06	-3.12143e-06	-2.30096e-06	-3.79867e-06	-3.57555e-06	-4.35456e-06	-1.09215e-06	-4.51672e-06	-5.89228e-06	-6.01582e-06	-2.54173e-07	-2.83053e-06	-1.35794e-05	-2.9033e-05	-3.12316e-05	-6.46698e-05	-5.88505e-05	-7.12812e-05	-7.06644e-05	-4.91179e-05	-0.000128806	-0.000107099	-0.000122077	-0.000126486	-0.00012434	-0.00020454	-2.82225e-05	6.10937e-06	-0.000293976	-0.000165291	-0.000133446	-0.00017467	-0.00013065	-4.05803e-05	1.1567e-09	-2.34709e-05
0	2.86986e-42	-3.44383e-41	1.46937e-39	-2.29589e-41	7.17465e-43	1.83671e-40	-1.50463e-35	2.88889e-34	-6.01853e-35	-1.20371e-35	-4.81482e-35	-9.0278e-36	-7.52316e-37	-2.35099e-38	-7.70372e-34	5.77779e-34	-3.27408e-33	6.16298e-33	-1.97215e-31	0	0	0	3.23117e-27	0	1.65436e-24	4.1359e-25	-1.69407e-21	0	0	-3.46945e-18	-1.11022e-16	6.93889e-17	-4.85723e-17	2.77556e-17	-8.32667e-17	1.66533e-16	-2.77556e-17	-1.52656e-16	-5.55112e-17	-4.33681e-17	-3.46945e-18	8.32667e-17	3.46945e-17	-2.08167e-17	-6.93889e-17	3.46945e-17	-1.40513e-16	-1.64354e-17	8.67362e-18
-2.14616e-05	-1.51282e-05	-1.23408e-05	-5.8388e-07	-5.17353e-05	-7.2634e-05	-4.56863e-05	-2.65574e-08	1.12173e-06	7.49561e-06	1.01539e-05	-1.05079e-06	-1.72683e-05	6.73503e-05	-0.000135656	0.000290472	-5.08247e-05	-0.000156461	-0.000148963	-0.000184107	-0.000594682	-0.000202389	-0.000262756	-0.000266895	-1.12776e-05	-0.000125836	-0.000603744	-0.00131519	-0.00148376	-0.00307831	-0.00291082	-0.0035693	-0.00368164	-0.00262246	-0.00691462	-0.00599274	-0.00753681	-0.00847028	-0.00957265	-0.0177137	-0.00101592	0.00246877	-0.0350206	-0.207446	0.942442	0.207364	0.0598406	0.0115851	-2.65034e-07	0.00603985
-0.00109572	-0.000801358	-0.000656189	-3.11253e-05	-0.00276681	-0.00393692	-0.00265294	-1.58399e-06	6.69122e-05	0.00044748	0.000606954	-6.28489e-05	-0.00103472	0.00406588	-0.00829698	0.502987	0.0603005	0.0145043	0.011637	0.0143835	-0.639752	-0.00166091	-0.000677323	0.000994911	4.16143e-05	0.000307464	0.0014485	0.000371695	0.000120356	0.000242684	0.00014858	0.000164486	0.000133545	8.93107e-05	0.000235962	-0.000509135	8.77433e-05	8.1645e-05	6.56191e-05	0.000132167	4.30959e-06	-1.03955e-05	0.000137966	0.000157275	-0.000505827	-7.94241e-05	-6.77494e-06	1.45489e-06	-2.8677e-08	1.16572e-06
-1.07391e-05	-7.56078e-06	-6.16692e-06	-2.9175e-07	-2.5848e-05	-3.62725e-05	-2.27571e-05	-1.32146e-08	5.58157e-07	3.72959e-06	5.05201e-06	-5.22802e-07	-8.59088e-06	3.34962e-05	-6.74309e-05	-7.42803e-05	-5.4938e-05	-9.59733e-05	-9.5028e-05	0.000273913	-2.03908e-05	-9.38786e-05	-0.000124125	-0.00013144	-5.56769e-06	-6.27914e-05	-0.000301319	-0.000655219	-0.000723081	-0.00149889	-0.00141002	-0.00137842	-0.00169181	-0.00119139	-0.0031327	-0.00265568	-0.00315854	-0.00338132	-0.00349906	-0.00599397	-0.000300624	0.000720531	-0.00992848	-0.00710751	-0.00597483	-0.00806932	-0.00642737	-0.00213238	6.17866e-08	-0.00125849
0	8.07148e-43	-1.14794e-41	3.67342e-40	-2.86986e-42	1.79366e-43	4.59177e-41	-3.76158e-36	7.22224e-35	-2.40741e-35	-4.5139e-36	-1.20371e-35	-3.76158e-36	-2.35099e-37	-1.17549e-38	-1.92593e-34	1.92593e-34	-3.85186e-34	2.31112e-33	-7.70372e-34	-4.81482e-34	-1.44445e-34	9.87039e-34	9.62965e-34	0	0	-5.77779e-34	0	-8.67362e-19	-1.73472e-18	0	0	0	-4.85723e-17	1.38778e-16	-5.55112e-17	-1.66533e-16	1.66533e-16	-9.71445e-17	1.249e-16	-2.94903e-17	-7.28584e-17	5.55112e-17	-1.66533e-16	2.91434e-16	-2.08167e-17	-1.9082e-17	-1.16769e-16	-1.50085e-17	-1.56938e-17
0	3.58732e-43	-2.86986e-42	9.18355e-41	-1.43493e-42	8.96831e-44	1.14794e-41	-7.52316e-37	2.40741e-35	-6.01853e-36	-7.52316e-37	-3.00927e-36	-7.52316e-37	-4.70198e-38	-2.20405e-39	-4.81482e-35	4.81482e-35	-1.92593e-34	5.77779e-34	-1.92593e-34	-1.44445e-34	-3.61112e-35	1.92593e-34	1.92593e-34	1.50463e-36	-4.81482e-35	-3.85186e-34	0	-1.0842e-19	1.0842e-19	-6.93889e-18	-2.77556e-17	-5.55112e-17	-1.38778e-16	0	1.11022e-16	-5.55112e-17	5.55112e-17	5.55112e-17	2.77556e-17	-1.04083e-17	-1.21431e-16	-2.77556e-17	0	-2.35922e-16	-1.11022e-16	-1.38778e-16	1.04083e-17	6.84015e-17	-5.0307e-17
-1.85976e-05	-1.30887e-05	-1.06754e-05	-5.05027e-07	-4.47421e-05	-6.27785e-05	-3.93612e-05	-2.28508e-08	9.65167e-07	6.44916e-06	8.73578e-06	-9.04008e-07	-1.48548e-05	5.79155e-05	-0.000116576	-9.98866e-05	-8.94016e-05	-0.00015205	-0.000143283	-0.000177659	2.02461e-05	-0.000180706	-0.00023597	-0.00024155	-1.02084e-05	-0.000113969	-0.000546818	-0.00121176	-0.00144483	-0.00300472	-0.00298529	-0.00372271	-0.00406827	-0.00301188	-0.0080125	-0.00748161	-0.0116153	-0.0166117	-0.0394468	0.4342	0.00187828	-0.00445535	0.051406	0.00679351	0.00534655	0.00634148	0.00426194	0.00121161	-1.82439e-05	0.000688618
-1.06304e-05	-7.48422e-06	-6.10447e-06	-2.88796e-07	-2.55863e-05	-3.59053e-05	-2.25268e-05	-1.30809e-08	5.5251e-07	3.69186e-06	5.0009e-06	-5.17513e-07	-8.50397e-06	3.31573e-05	-6.67489e-05	-7.35372e-05	-5.43895e-05	-9.50432e-05	-9.41308e-05	0.000273205	-2.01566e-05	-9.28661e-05	-0.000122796	-0.000130061	-5.50939e-06	-6.21384e-05	-0.000298185	-0.000648437	-0.000715599	-0.00148338	-0.00139543	-0.00136416	-0.00167431	-0.00117906	-0.00310028	-0.0026282	-0.00312585	-0.00334633	-0.00346285	-0.00593195	-0.000297518	0.000713071	-0.00982573	-0.00703395	-0.005913	-0.00798581	-0.00636084	-0.00211031	6.11471e-08	-0.00124546
0	0	0	0	0	0	0	0	0	0	0	0	0	0	0	0	0	0	0	0	0	0	0	0	0	0	0	0	0	1.05879e-22	-5.42101e-20	0	-6.93889e-18	5.55112e-17	0	0	0	-2.22045e-16	1.38778e-16	2.22045e-16	-9.1073e-18	-3.03577e-17	-5.55112e-17	0	-5.55112e-17	8.32667e-17	9.71445e-17	1.04083e-16	7.65691e-18	3.46945e-18
0	0	0	0	0	0	0	0	0	0	0	0	0	0	0	0	0	0	0	0	0	0	0	0	0	0	0	0	-2.64698e-23	-5.29396e-23	4.06576e-20	0	0	0	5.55112e-17	-2.77556e-17	5.55112e-17	-8.32667e-17	8.32667e-17	2.77556e-17	2.77556e-17	-1.73472e-18	-2.77556e-17	2.77556e-17	1.38778e-16	-5.55112e-17	1.38778e-17	1.38778e-17	-1.13878e-17	-5.0307e-17
-0.000913489	-0.00066289	-0.000542372	-2.57128e-05	-0.00228413	-0.00324098	-0.00215299	-1.27847e-06	5.4005e-05	0.000361103	0.000489666	-5.06978e-05	-0.000834358	0.00327361	-0.00666263	0.299079	0.0342413	0.00390359	0.00150788	-0.00468561	0.759158	0.0087583	0.00885259	0.00349146	0.000132676	0.000669153	0.00313208	0.000650392	0.000205746	0.000414621	0.000250899	0.000276587	0.000220447	0.000144419	0.00037894	-0.000615354	0.000154201	0.000140734	0.000117384	6.15663e-05	5.6356e-06	-1.35969e-05	0.000180121	7.47739e-06	0.000319458	0.000124374	6.33388e-05	1.6967e-05	-1.19944e-08	9.52035e-06
0	0	0	0	0	0	0	0	0	0	0	0	0	0	0	0	0	0	0	0	0	0	0	0	0	0	0	0	-4.1359e-25	0	2.11758e-22	-3.38813e-21	0	-1.38778e-17	0	0	-2.77556e-17	-2.77556e-17	1.11022e-16	1.11022e-16	1.70003e-16	7.28584e-17	2.86229e-17	-2.22045e-16	1.66533e-16	-1.38778e-16	1.249e-16	1.14492e-16	-4.069e-17	-2.08167e-17
0	0	0	0	0	0	0	0	0	0	0	0	0	0	0	0	0	0	0	0	0	0	0	0	0	0	0	0	-6.46235e-27	6.46235e-27	2.64698e-23	-1.05879e-22	2.71051e-20	0	8.67362e-19	4.33681e-19	6.93889e-18	2.77556e-17	0	3.33067e-16	-2.60209e-18	1.73472e-17	-2.22045e-16	0	2.77556e-17	2.77556e-16	-2.77556e-17	7.28584e-17	9.12954e-17	2.77556e-17
0	0	0	0	0	0	0	0	0	0	0	0	0	0	0	0	0	0	0	0	0	0	0	0	0	0	0	0	0	-2.01948e-28	0	1.32349e-23	1.69407e-21	5.42101e-20	5.42101e-20	-5.42101e-20	-4.33681e-19	-6.93889e-18	1.38778e-17	0	-3.48679e-16	-9.71445e-17	0	-2.77556e-16	1.249e-16	-2.08167e-17	-5.55112e-17	-4.85723e-17	-2.54879e-17	2.08167e-17
-4.37899e-05	-7.45667e-05	-7.4386e-05	-4.16649e-06	-0.000486768	0.00148745	4.62604e-05	1.47592e-07	-6.49021e-06	-6.2382e-05	-0.000295383	-0.000908185	-0.000123474	9.3622e-05	-7.9388e-05	-6.153e-05	-0.000283048	-0.000115167	-0.00010832	-0.000134225	-3.33257e-05	-0.000138264	-0.000180559	-0.000185384	-7.83821e-06	-8.77305e-05	-0.000420949	-0.0009192	-0.00103638	-0.00215009	-0.00203209	-0.00249148	-0.00256948	-0.00183063	-0.00482724	-0.00419031	-0.00399598	-0.00575035	-0.0064989	-0.0120565	-0.000653468	0.00146095	-0.0235439	-0.0817693	-0.186833	0.667008	0.0613439	0.0102282	9.40987e-07	0.00521509
-0.0155988	-0.0341649	-0.0350565	-0.00200159	-0.239678	0.814015	0.0406174	8.7586e-05	-0.00383528	-0.0357074	-0.160163	-0.481087	-0.0593837	0.0259524	0.00557633	0.0188651	-0.112458	0.00154157	0.00148511	0.00165284	0.000354117	0.00121371	0.00148499	0.000990968	3.91881e-05	0.000243261	0.00114238	0.000280895	9.15651e-05	0.000184649	0.000112606	0.000124067	9.66382e-05	5.99048e-05	0.00015355	0.00011007	8.44699e-05	8.87697e-05	7.69399e-05	0.000119035	5.32216e-06	-1.21343e-05	0.000181618	0.000337782	0.000724732	-0.00247079	-0.000208431	-3.19865e-05	-3.30263e-09	-1.59257e-05
-2.55276e-05	-3.27336e-06	-1.33397e-05	-6.52627e-07	-5.88793e-05	-8.336e-05	-5.32314e-05	-3.08728e-08	1.30389e-06	8.70426e-06	1.16981e-05	-1.62311e-06	-2.01679e-05	7.84701e-05	-0.000157931	-0.000170826	-0.000126038	-0.000207941	-0.000195704	-0.000241908	-5.98809e-05	-0.000247626	-0.000323058	-0.000330061	-1.39474e-05	-0.000155617	-0.000746635	-0.00165357	-0.00197735	-0.00411321	-0.00412121	-0.00516183	-0.00577161	-0.00437813	-0.0117288	-0.0118852	0.120986	-0.00507817	-0.0153186	-0.0487669	-0.0754928	0.5353	0.438886	0.0109463	0.00799141	0.00982871	0.00667194	0.00237041	0.00156029	0.00256208
-1.05555e-05	-7.42555e-06	-6.0579e-06	-2.86586e-07	-2.53895e-05	-3.56223e-05	-2.23289e-05	-1.29613e-08	5.47457e-07	3.65804e-06	4.95495e-06	-5.1302e-07	-8.42575e-06	3.2849e-05	-6.61166e-05	-7.13442e-05	-5.25908e-05	-8.68052e-05	-8.16897e-05	-0.000100957	-2.49859e-05	-0.000103299	-0.000134754	-0.000137576	-5.81276e-06	-6.47456e-05	-0.000310619	-0.00066707	-0.000726454	-0.00150498	-0.00138285	-0.00168007	-0.00168184	-0.001176	-0.00308801	-0.00259375	-0.00284641	-0.00316377	-0.0031978	-0.00538185	-0.000375216	0.00146815	-0.00773463	-0.00504643	-0.00413544	-0.00547436	-0.00418505	-0.00132761	3.06216e-06	-0.000770372
0	0	0	0	0	0	0	0	0	0	0	0	0	0	0	0	0	0	0	0	0	0	0	0	0	0	0	0	-1.625e-34	1.24885e-34	-9.86076e-32	0	-1.61559e-27	0	5.16988e-26	2.06795e-25	-2.64698e-23	0	-1.35525e-20	0	6.245e-17	1.38778e-17	8.67362e-19	0	-1.38778e-16	5.55112e-17	-1.73472e-17	-6.93889e-17	3.02812e-17	1.73472e-17
0	0	0	0	0	0	0	0	0	0	0	0	0	0	0	0	0	0	0	0	0	0	0	0	0	0	0	0	1.78764e-33	-1.33865e-33	1.71023e-31	-1.36818e-30	1.26218e-29	0	0	0	0	-1.32349e-23	-1.69407e-21	0	0	0	1.6263e-19	-2.77556e-17	5.55112e-17	-8.32667e-17	0	1.66533e-16	2.29749e-17	0
-0.0115975	-0.022655	-0.022874	-0.0012911	-0.152236	0.479096	-0.00174781	-0.000116734	0.00515673	0.0512059	0.254604	0.798483	0.115896	-0.107307	0.107672	0.0137032	-0.0657088	0.00241458	0.00211078	0.00215076	0.000443987	0.00148318	0.00180357	0.00117368	4.63033e-05	0.000158949	0.00124564	0.00031788	0.000100365	0.000202135	0.000120152	0.000131287	9.95281e-05	6.06531e-05	0.000154873	0.000107743	9.00963e-05	7.7671e-05	6.05845e-05	8.50798e-05	3.37429e-06	-8.13459e-06	0.000107154	3.59726e-05	2.7879e-05	3.50687e-05	2.49536e-05	7.36025e-06	-2.08374e-10	4.19608e-06
-2.9031e-06	-4.14838e-06	-4.02207e-06	-2.20631e-07	-2.50448e-05	6.54769e-05	-2.83918e-06	-1.85092e-08	8.14736e-07	7.8842e-06	3.76584e-05	0.000115975	1.59201e-05	-1.18414e-05	8.04931e-06	-6.23086e-06	-1.57034e-05	-9.66895e-06	-9.12289e-06	-1.13425e-05	-2.82044e-06	-1.1715e-05	-1.53031e-05	-1.57434e-05	-6.65944e-07	-1.317e-06	-3.15485e-05	-7.63137e-05	-8.21862e-05	-0.000170186	-0.00015494	-0.00018769	-0.000186132	-0.000129402	-0.000339355	-0.000282241	-0.000321845	-0.000333483	-0.000327491	-0.000536576	-2.51586e-05	6.08514e-05	-0.000826058	-0.000442785	-0.000357597	-0.000468199	-0.000350414	-0.000108898	3.10489e-09	-6.30053e-05
-4.35348e-05	-7.41578e-05	-7.39813e-05	-4.14395e-06	-0.000484154	0.00147974	4.60714e-05	1.46846e-07	-6.45736e-06	-6.20623e-05	-0.000293839	-0.0009034	-0.000122803	9.30492e-05	-7.88096e-05	-6.10411e-05	-0.000281376	-0.000114351	-0.000107553	-0.000133276	-3.30901e-05	-0.000137288	-0.000179284	-0.000184077	-7.78297e-06	-8.71129e-05	-0.000417986	-0.000912738	-0.0010291	-0.00213498	-0.0020178	-0.00247396	-0.00255142	-0.00181776	-0.00479331	-0.00416086	-0.00396789	-0.00570994	-0.00645323	-0.0119718	-0.000648876	0.00145069	-0.0233784	-0.0811951	-0.185521	0.662324	0.0609131	0.0101564	9.34379e-07	0.00517847
-0.00277619	-0.00257755	-0.00217225	-0.000105106	-0.00958844	-0.0153314	-0.0310818	-0.00010648	0.00458921	0.0360278	0.0675079	-0.00849921	-0.413528	-0.230168	0.155572	0.00321618	0.00216534	0.00212312	0.00179398	0.00190772	0.000489237	-0.0196481	-0.00148266	0.000352075	1.46252e-05	9.28396e-05	0.000433946	-0.000242721	-0.000387468	-0.000805616	-0.00077309	-0.000946531	-0.000962454	-0.000695668	-0.00179321	-0.00150954	-0.00177526	-0.001843	-0.00189617	-0.00318127	-0.000153674	0.000371933	-0.00507895	-0.00310779	-0.00253483	-0.00335693	-0.00257152	-0.00081901	2.3496e-08	-0.000477475
-0.00276742	-0.00257133	-0.00216717	-0.000104865	-0.00956711	-0.0153013	-0.0310613	-0.000106461	0.0045884	0.036022	0.0674986	-0.00849812	-0.413488	-0.230176	0.155613	0.00327372	0.00220777	0.00219327	0.00186	0.00198932	0.000509425	-0.019561	-0.00137312	0.000463547	1.93349e-05	0.000145297	0.000685613	0.000297821	0.000201229	0.000413975	0.0003475	0.000414878	0.000400248	0.000254906	0.000706752	0.000589518	0.000668418	0.00072782	0.000694447	0.00115295	5.51823e-05	-0.000133534	0.00182081	0.00106686	0.000886241	0.00117471	0.000899561	0.000286234	-8.20938e-09	0.000166816
-2.84921e-05	-2.00987e-05	-1.63981e-05	-7.75933e-07	-6.87635e-05	-9.66263e-05	-6.22565e-05	-4.30972e-08	1.82755e-06	1.26335e-05	1.85846e-05	-2.04227e-06	-5.51081e-05	6.98797e-05	-0.000164862	-0.000190871	-0.000140717	-0.000232398	-0.000218725	-0.000270357	-6.6914e-05	-0.000278376	-0.000361255	-0.000368786	-1.55826e-05	-0.000173701	-0.000833365	-0.0018138	-0.00205111	-0.00425583	-0.00403283	-0.0049486	-0.00511642	-0.00364633	-0.00962443	-0.00836339	-0.0105901	-0.0119736	-0.0136855	-0.0258607	-0.00150754	0.00366564	-0.0522996	0.962624	0.153024	0.125657	0.055453	0.0127263	-3.49413e-07	0.00705862
-0.00263796	-0.00245104	-0.00206579	-9.99597e-05	-0.00911955	-0.0145855	-0.0296082	-0.000101481	0.00437375	0.0343368	0.0643409	-0.00810057	-0.394145	-0.219408	0.148334	0.00312057	0.00210449	0.00209066	0.00177299	0.00189626	0.000485593	-0.0186459	-0.00130888	0.000441862	1.84304e-05	0.0001385	0.000653539	0.000283889	0.000191815	0.000394608	0.000331244	0.000395469	0.000381524	0.000242981	0.000673689	0.00056194	0.000637149	0.000693771	0.000661959	0.00109901	5.26008e-05	-0.000127287	0.00173563	0.00101695	0.000844782	0.00111976	0.000857478	0.000272843	-7.82533e-09	0.000159013
-1.87828e-05	-1.32172e-05	-1.078e-05	-5.09972e-07	-4.51797e-05	-6.33892e-05	-3.97333e-05	-2.30643e-08	9.74183e-07	6.50939e-06	8.81731e-06	-9.12443e-07	-1.49933e-05	5.84536e-05	-0.000117652	-0.000126964	-9.35908e-05	-0.000154489	-0.000145388	-0.000179688	-4.44733e-05	-0.000183878	-0.000239877	-0.000244955	-1.03501e-05	-0.000115347	-0.000553394	-0.0012	-0.00134278	-0.0027849	-0.00261571	-0.00320037	-0.00327724	-0.0023237	-0.00612056	-0.00526156	-0.00648563	-0.00715349	-0.00781847	-0.0140943	-0.000757987	0.00183922	-0.0257215	-0.0244042	-0.0319197	-0.0510015	-0.0615258	-0.0456192	1.92765e-06	-0.0439795
-0.00276742	-0.00257133	-0.00216717	-0.000104865	-0.00956711	-0.0153013	-0.0310613	-0.000106461	0.0045884	0.036022	0.0674986	-0.00849812	-0.413488	-0.230176	0.155613	0.00327372	0.00220777	0.00219327	0.00186	0.00198932	0.000509425	-0.019561	-0.00137312	0.000463547	1.93349e-05	0.000145297	0.000685613	0.000297821	0.000201229	0.000413975	0.0003475	0.000414878	0.000400248	0.000254906	0.000706752	0.000589518	0.000668418	0.00072782	0.000694447	0.00115295	5.51823e-05	-0.000133534	0.00182081	0.00106686	0.000886241	0.00117471	0.000899561	0.000286234	-8.20938e-09	0.000166816
-3.89372e-05	-2.76103e-05	-2.25843e-05	-1.07152e-06	-9.5494e-05	-0.00012355	-8.17043e-05	-4.68447e-08	1.97738e-06	1.31208e-05	1.67545e-05	-6.26693e-06	-3.15116e-05	0.000120981	-0.000242978	-0.000262181	-0.000194476	-0.000319339	-0.000300559	-0.000371564	-9.19879e-05	-0.000380475	-0.000496415	-0.00050751	-2.14487e-05	-0.000239703	-0.00115016	-0.00262619	-0.0034585	-0.00722551	-0.0079504	-0.0102989	-0.013035	-0.010832	-0.0296696	-0.0366599	0.987873	0.0557285	0.0245256	0.0326538	0.0139438	-0.0951193	-0.0517164	0.00454158	0.00381565	0.00264402	0.00283671	0.00079135	-0.000186664	0.000305666
-3.52596e-05	-2.48903e-05	-2.03074e-05	-9.60901e-07	-8.51527e-05	-0.000119615	-7.54545e-05	-4.39128e-08	1.8548e-06	1.23946e-05	1.67912e-05	-1.7377e-06	-2.85591e-05	0.000111424	-0.000224559	0.00102306	-1.4134e-05	-0.000236501	-0.000229152	-0.000294012	0.000206296	-0.000303518	-0.000398003	-0.000413633	-1.75077e-05	-0.000197438	-0.000947574	-0.00222507	-0.00317709	-0.0066654	-0.00815124	-0.0110631	-0.0176609	-0.0193249	-0.0579724	0.703167	0.0224578	0.0134055	0.00795474	0.00988793	0.000353191	-0.000849896	0.0110214	0.0030993	0.00237102	0.00298644	0.00208369	0.000607029	-2.55864e-09	0.000344919
0	0	0	0	0	0	0	0	0	0	0	0	0	0	0	0	0	0	0	0	0	0	0	0	0	0	0	0	1.51963e-33	-1.14199e-33	1.46374e-31	-1.16815e-30	1.09019e-29	-1.55692e-29	-1.24575e-29	2.49034e-29	-4.98369e-29	3.10537e-30	1.24215e-29	2.99767e-29	-2.06795e-25	-1.03398e-25	-1.61559e-27	1.01644e-20	-5.42101e-20	2.1684e-19	-1.73472e-18	0	-5.36087e-18	-2.77556e-17
-0.00200704	-0.00146267	-0.00119727	-5.67769e-05	-0.0050455	-0.00717017	-0.00480077	-2.8594e-06	0.000120787	0.000807717	0.00109544	-0.000113425	-0.00186707	0.00733163	-0.0149436	0.801263	0.0944481	0.0183923	0.013135	0.00969619	0.118596	0.00708436	0.00816145	0.00448011	0.000174049	0.000975338	0.00457458	0.00102073	0.000325607	0.000656302	0.0003988	0.000440297	0.000353306	0.000233257	0.000613655	-0.00112363	0.00024093	0.000221081	0.000180338	0.000220466	1.00504e-05	-2.42417e-05	0.000320917	0.000165068	-0.000186209	4.52037e-05	5.67321e-05	1.84538e-05	2.79244e-08	1.06665e-05
-8.54648e-06	-6.01771e-06	-4.90244e-06	-2.32156e-07	-2.05701e-05	-2.88712e-05	-1.82019e-05	-1.10207e-08	4.67774e-07	3.13109e-06	4.33372e-06	-4.5586e-07	-8.82568e-06	2.54319e-05	-5.26882e-05	-5.76544e-05	-4.25002e-05	-7.01511e-05	-6.60153e-05	-8.15746e-05	-2.01808e-05	-8.54879e-05	-0.000109195	-0.000111262	-4.70077e-06	-5.23528e-05	-0.000251163	-0.000539373	-0.000587415	-0.00121693	-0.00111814	-0.00135844	-0.00135973	-0.000948496	-0.00249449	-0.00209446	-0.00243833	-0.00256519	-0.00258493	-0.0043247	-0.000208397	0.000504355	-0.00688458	-0.00416542	-0.0034135	-0.00452162	-0.0034634	-0.00110279	3.16351e-08	-0.000642864
0	0	0	0	0	0	0	0	0	0	0	0	0	0	0	0	0	0	0	0	0	0	0	0	0	0	0	0	4.82423e-34	-3.61582e-34	4.62825e-32	-3.70453e-31	3.45589e-30	-4.94194e-30	-3.95201e-30	7.89477e-30	-1.58142e-29	9.89158e-31	3.95971e-30	9.87001e-30	0	1.26218e-29	-1.57772e-29	0	0	-4.23516e-22	-6.77626e-21	0	-4.63666e-18	0
-1.05951e-06	-9.09509e-07	-7.62079e-07	-3.67451e-08	-3.33899e-06	-5.29436e-06	5.79019e-05	2.37878e-09	-1.00001e-07	-6.45803e-07	-8.29856e-07	8.38412e-08	1.28262e-06	-3.82206e-06	5.10974e-06	-3.09018e-06	-2.30777e-06	-4.0295e-06	-3.82669e-06	-4.79591e-06	-1.19759e-06	-4.99025e-06	-6.52381e-06	-6.72925e-06	-2.84652e-07	-3.15065e-06	-1.5115e-05	-3.29701e-05	-3.54865e-05	-7.34805e-05	-6.68676e-05	-8.099e-05	-8.02816e-05	-5.57983e-05	-0.000146322	-0.000121642	-0.000138577	-0.000143482	-0.000140745	-0.000230391	-1.07985e-05	2.61005e-05	-0.000354188	-0.000188961	-0.000152523	-0.000199614	-0.00014928	-4.6356e-05	1.32146e-09	-2.68142e-05
-3.52596e-05	-2.48903e-05	-2.03074e-05	-9.60901e-07	-8.51527e-05	-0.000119615	-7.54545e-05	-4.39128e-08	1.8548e-06	1.23946e-05	1.67912e-05	-1.7377e-06	-2.85591e-05	0.000111424	-0.000224559	0.00102306	-1.4134e-05	-0.000236501	-0.000229152	-0.000294012	0.000206296	-0.000303518	-0.000398003	-0.000413633	-1.75077e-05	-0.000197437	-0.000947574	-0.00222507	-0.00317708	-0.0066654	-0.00815124	-0.0110631	-0.0176609	-0.0193249	-0.0579724	0.703167	0.0224578	0.0134055	0.00795474	0.00988791	0.000353191	-0.000849896	0.0110214	0.0030993	0.00237102	0.00298644	0.00208369	0.000607029	-2.49132e-09	0.000344919
0	0	0	0	0	0	0	0	0	0	0	0	0	0	0	0	0	0	0	0	0	0	0	0	0	0	0	0	-1.32572e-34	9.93763e-35	-1.27111e-32	1.01808e-31	-9.5088e-31	1.3572e-30	1.08613e-30	-2.1738e-30	4.34259e-30	-2.72519e-31	-1.08757e-30	-2.71999e-30	6.7865e-32	-2.71652e-31	4.34413e-30	1.26218e-29	8.07794e-28	9.69352e-27	-6.20385e-25	8.47033e-22	-9.71445e-17	-2.1684e-19
-0.0197035	-0.0965426	-0.197895	0.712641	0.639644	0.176651	0.0222274	9.88109e-06	-0.000419495	-0.00278423	-0.00373132	0.000384231	0.00622025	-0.0228688	0.0418951	0.00553253	0.00374249	0.00360593	0.00297425	0.00285847	0.000575106	0.00188721	0.00228507	0.00146054	5.75109e-05	0.00034788	0.00163449	0.000389468	0.00012305	0.000247835	0.00014748	0.00016121	0.000122372	7.46369e-05	0.000190615	0.000132806	0.000111465	9.64405e-05	7.57248e-05	0.000107075	4.29618e-06	-1.03597e-05	0.000136862	5.673e-05	4.95402e-05	7.55713e-05	-0.000176798	2.69001e-06	-1.04954e-10	2.23127e-06
-1.06659e-06	4.5504e-06	-1.31768e-07	-1.39017e-08	-1.59556e-06	-2.85088e-06	-2.00025e-06	-1.17054e-09	4.94422e-08	3.30429e-07	4.47714e-07	-4.6337e-08	-7.61714e-07	2.97418e-06	-5.99991e-06	-6.61162e-06	-4.8749e-06	-8.05559e-06	-7.58234e-06	-9.37356e-06	-2.32031e-06	-9.59442e-06	-1.25165e-05	-1.27809e-05	-5.40015e-07	-6.01499e-06	-2.8857e-05	-6.17922e-05	-6.67613e-05	-0.000138266	-0.000126349	-0.000153265	-0.000152783	-0.000106645	-0.000279957	-0.000235164	-0.00015137	-0.000273637	-0.000283686	-0.000507143	-0.000160135	0.00104456	0.000179273	-0.000319647	-0.00025952	-0.000340675	-0.000255729	-7.79286e-05	5.78875e-06	-4.05737e-05
-6.15728e-05	-4.33298e-05	-3.53401e-05	-1.67185e-06	-0.000148114	-0.000207814	-0.00013027	-7.56209e-08	3.19406e-06	2.13424e-05	2.89094e-05	-2.99164e-06	-4.91587e-05	0.000191654	-0.000385757	-0.000416719	-0.000307216	-0.0005076	-0.000477866	-0.000589196	-0.000146347	-0.000605752	-0.000790539	-0.000809884	-3.42416e-05	-0.000384592	-0.0018458	-0.00466238	-0.0098782	-0.0212761	-0.0878581	0.994362	0.0294028	0.0129361	0.0313979	0.0168143	0.0106941	0.00830193	0.00587701	0.00785123	0.000297908	-0.000717567	0.00938704	0.00289895	0.00223058	0.00282089	0.00198191	0.0005809	-1.63428e-08	0.000330623
0	0	0	0	0	0	0	0	0	0	0	0	0	0	0	0	0	0	0	0	0	0	0	0	0	0	0	0	8.95998e-35	-6.72815e-35	8.6175e-33	-6.89648e-32	6.42509e-31	-9.19017e-31	-7.35795e-31	1.4668e-30	-2.94673e-30	1.8353e-31	7.36989e-31	1.83234e-30	-4.60049e-32	1.83617e-31	-2.94384e-30	-1.10183e-30	-1.46521e-30	3.5993e-31	-5.85948e-30	8.1671e-30	0	5.52203e-30
-1.89478e-05	-1.33334e-05	-1.08748e-05	-5.14457e-07	-4.5577e-05	-6.39469e-05	-4.00833e-05	-2.32675e-08	9.82768e-07	6.56675e-06	8.89501e-06	-9.20484e-07	-1.51254e-05	5.89688e-05	-0.00011869	-0.000128106	-9.44351e-05	-0.00015593	-0.000146777	-0.000179043	-4.48526e-05	-0.000185526	-0.000242046	-0.000247282	-1.04492e-05	-0.000116552	-0.000559197	-0.00123099	-0.00143993	-0.002992	-0.00292068	-0.00361992	-0.00387182	-0.00282444	-0.00748795	-0.00677737	-0.00961864	-0.0122303	-0.0184964	-0.0539186	-0.434015	-0.388634	0.389738	0.0106363	0.0077461	0.00945645	0.00629019	0.00168459	-4.94037e-08	0.00100024
0	0	0	0	0	0	0	0	0	0	0	0	0	0	0	0	0	0	0	0	0	0	0	0	0	0	0	0	-3.08851e-35	2.32537e-35	-2.99949e-33	2.39039e-32	-2.21016e-31	3.18473e-31	2.55957e-31	-5.03075e-31	1.02972e-30	-6.39892e-32	-2.6185e-31	-6.2516e-31	1.59973e-32	-6.32526e-32	1.02383e-30	3.80989e-31	5.00128e-31	-1.103e-31	1.98431e-30	-2.72725e-30	-1.1668e-35	-1.84549e-30
-0.00559251	-0.00524308	-0.00442475	-0.000214242	-0.0195757	-0.0315023	-0.0727486	0.710481	-0.430955	-0.351314	-0.199024	0.0162139	0.161423	-0.241207	0.234771	0.00599815	0.00402023	0.00371536	0.00304299	0.00289248	0.000577804	0.00188403	0.00227722	0.0014433	5.67779e-05	0.000341396	0.00160379	0.000379585	0.00011965	0.000240968	0.00014317	0.00015642	0.000118542	7.2227e-05	0.000184418	0.00012826	0.000107172	9.23622e-05	7.19944e-05	0.000101047	4.00461e-06	-9.65357e-06	0.000127153	4.25393e-05	3.29062e-05	4.17687e-05	2.94887e-05	8.70082e-06	-2.45084e-10	4.95956e-06
-0.00279475	-0.00464276	-0.00460696	-0.000257017	-0.0298597	0.0884636	0.00112781	1.86629e-07	-7.91747e-06	-5.71891e-05	-0.000152598	-0.00030667	-8.99295e-06	0.000111937	-0.000886376	-0.0821744	0.695855	0.0110509	0.007841	0.00619364	0.0011181	0.00336326	0.00398133	0.00229891	8.95462e-05	0.000508142	0.00238162	0.000532866	0.00016717	0.000336652	0.000199888	0.000218361	0.00016544	0.000100791	0.000257347	0.000178959	0.000149549	0.000128846	0.000100426	0.000140948	5.58613e-06	-1.3467e-05	0.000177362	5.94029e-05	4.60718e-05	5.75798e-05	4.11171e-05	1.21253e-05	-3.44385e-10	6.91199e-06
0	0	0	0	0	0	0	0	0	0	0	0	0	0	0	0	0	0	0	0	0	0	0	0	0	0	0	0	0	0	0	0	0	0	0	0	0	0	0	0	0	0	0	0	0	0	0	0	0	0
-0.00105673	-0.000799145	-0.000657872	-3.13251e-05	-0.00279908	-0.00408805	-0.00433046	-9.69099e-06	0.000416764	0.00321972	0.00587827	-0.000731017	-0.03422	-0.0159794	0.00719709	-0.00718522	-0.00547109	-0.0122408	-0.0130141	-0.0228442	-0.00992042	0.99078	0.124203	0.0149354	0.000538485	0.00213373	0.00994118	0.00175448	0.000544956	0.00109762	0.000655273	0.000717631	0.000549454	0.000337662	0.000864033	0.000613757	0.000586725	-0.00137429	0.000258276	0.000393321	1.6147e-05	-3.89427e-05	0.000515011	0.000177865	0.000137782	0.000175049	0.000123965	3.65829e-05	-1.03073e-09	2.08593e-05
-1.86102e-05	-1.30958e-05	-1.0681e-05	-5.05288e-07	-4.47647e-05	-6.2807e-05	-3.93689e-05	-2.28547e-08	9.65333e-07	6.45037e-06	8.73778e-06	-9.04247e-07	-1.48647e-05	5.79113e-05	-0.000116568	-0.000125797	-9.27307e-05	-0.000153069	-0.000144052	-0.000178037	-4.40646e-05	-0.00018219	-0.000237674	-0.000242705	-1.0255e-05	-0.000114287	-0.000548311	-0.00118907	-0.00133165	-0.00276198	-0.00260022	-0.0031863	-0.00332113	-0.00121104	-0.00542004	-0.00509612	-0.00632885	-0.00698458	-0.00761182	-0.0136834	-0.000732367	0.00177684	-0.0248207	-0.0194745	-0.0276657	-0.0434526	-0.0485107	-0.027899	9.92822e-07	-0.0213611
-1.38375e-05	-9.73725e-06	-7.94174e-06	-3.75702e-07	-3.32843e-05	-4.66995e-05	-2.92721e-05	-1.69923e-08	7.17717e-07	4.79575e-06	6.49622e-06	-6.72259e-07	-1.10484e-05	4.30616e-05	-8.66741e-05	-9.35324e-05	-6.89469e-05	-0.000113808	-0.000107104	-0.000132376	-3.27675e-05	-0.000134235	-0.000176515	-0.000180359	-7.62063e-06	-8.49029e-05	-0.000407328	-0.000877698	-0.000964782	-0.00199948	-0.00185115	-0.00225451	-0.00227483	-0.00159856	-0.00420226	-0.00356021	-0.00427888	-0.00248884	-0.00449723	-0.00771907	-0.000382758	0.000926912	-0.0127247	-0.00878096	-0.00736343	-0.00991639	-0.00787665	-0.00265943	7.86915e-08	-0.00161622
-3.74438e-05	-2.63729e-05	-2.15123e-05	-1.01777e-06	-9.01756e-05	-0.000126581	-7.98982e-05	-4.8473e-08	2.04955e-06	1.38213e-05	1.91625e-05	-2.01865e-06	-3.96213e-05	0.000111084	-0.000230858	-0.000255945	-0.000188962	-0.000317575	-0.000301549	-0.000384858	-0.000102935	0.00143009	-0.000235698	-0.00044228	-1.88572e-05	-0.000217544	-0.00104433	-0.00238856	-0.00300634	-0.00626731	-0.00656709	-0.00834967	-0.00981036	-0.00766749	-0.0206706	-0.0217008	-0.0594711	0.995392	0.0355707	0.0327134	0.000983302	-0.00235995	0.0299213	0.00686762	0.00519899	0.00650286	0.0044838	0.00129353	-3.62714e-08	0.000733267
-0.00935552	-0.0786406	0.605003	0.00358413	0.150606	0.0667089	0.00950942	4.2847e-06	-0.000180811	-0.00120016	-0.00160882	0.000165687	0.00268321	-0.00987781	0.018131	0.00240059	0.00162146	0.00154064	0.00126448	0.00120113	0.000238691	0.00076965	0.000925712	0.00055862	2.17418e-05	0.000112428	0.00052409	-0.00026159	-0.000429528	-0.000893937	-0.000874437	-0.00107722	-0.00111802	-0.000796319	-0.00209908	-0.00181131	-0.00223476	-0.0024586	-0.00265935	-0.00473867	-0.00024974	0.000605668	-0.00842872	-0.00910916	-0.00834358	-0.0121402	-0.0115459	-0.00489114	1.52566e-07	-0.00316423
-0.00933835	-0.0786273	0.605003	0.00358454	0.150644	0.0667652	0.00954526	4.30552e-06	-0.000181691	-0.00120604	-0.00161678	0.000166511	0.00269675	-0.0099306	0.0182373	0.00251556	0.00170621	0.00168056	0.00139616	0.00136389	0.000278974	0.00093621	0.00114299	0.000780497	3.11167e-05	0.000216902	0.00102532	0.000823843	0.000780384	0.00161499	0.00147453	0.00179379	0.00181191	0.00127667	0.00335848	0.00286293	0.00347415	0.00379307	0.00407104	0.00722317	0.000379176	-0.000919511	0.0127881	0.0137125	0.0125532	0.0182583	0.0173529	0.00734683	-2.29135e-07	0.00475213
-0.00468634	-0.0393269	0.302501	0.00179186	0.0752835	0.0333262	0.00473679	2.13193e-06	-8.99656e-05	-0.000597143	-0.000800426	8.24313e-05	0.00133483	-0.00491251	0.00901234	0.00114281	0.00076835	0.000700356	0.000566398	0.000519188	9.92042e-05	0.000301545	0.000354216	0.000168371	6.18339e-06	3.97712e-06	1.14313e-05	-0.000673512	-0.00081972	-0.00170143	-0.0016117	-0.00197412	-0.00202398	-0.00143465	-0.00377832	-0.00324278	-0.00397184	-0.00435514	-0.00469487	-0.00835026	-0.000439328	0.00106542	-0.0148228	-0.0159654	-0.0146202	-0.0212694	-0.0202223	-0.00856456	2.67134e-07	-0.0055403
-0.00466917	-0.0393136	0.302501	0.00179227	0.0753219	0.0333826	0.00477263	2.15276e-06	-9.08452e-05	-0.00060302	-0.000808388	8.32552e-05	0.00134837	-0.00496529	0.00911862	0.00125778	0.000853106	0.000840278	0.00069808	0.000681942	0.000139487	0.000468104	0.000571495	0.000390248	1.55583e-05	0.000108451	0.000512658	0.000411921	0.000390192	0.000807494	0.000737264	0.000896893	0.000905954	0.000638332	0.00167924	0.00143147	0.00173707	0.00189653	0.00203552	0.00361158	0.000189588	-0.000459755	0.00639404	0.00685626	0.00627658	0.00912915	0.00867645	0.00367341	-1.14567e-07	0.00237606
-6.00953e-05	-4.23419e-05	-3.45402e-05	-1.6342e-06	-0.000144802	-0.000203323	-0.000129257	-8.24673e-08	3.49095e-06	2.37771e-05	3.378e-05	-3.62289e-06	-8.25566e-05	0.000166966	-0.000361932	-0.000404683	-0.000298347	-0.000492882	-0.000463954	-0.000573696	-0.000142056	-0.000589554	-0.000767247	-0.00078492	-3.31784e-05	-0.000371587	-0.00178315	-0.00424583	-0.00660395	-0.0139218	-0.0195176	-0.0284527	-0.0783647	0.86808	0.483179	0.0586747	0.0230628	0.0159756	0.0103789	0.0133441	0.00049089	-0.0011818	0.0153886	0.00452041	0.00348449	0.00440723	0.00310639	0.000924219	-2.62388e-08	0.000532312
0	0	0	0	0	0	0	0	0	0	0	0	0	0	0	0	0	0	0	0	0	0	0	0	0	0	0	0	0	0	0	0	0	0	0	0	0	0	0	0	0	0	0	0	0	0	0	0	0	0
-2.38555e-05	-3.45917e-05	-5.38734e-05	0.000152937	9.05738e-05	-2.81469e-05	-3.67039e-05	6.54829e-09	9.09567e-07	6.18311e-06	8.39508e-06	-8.69333e-07	-1.43092e-05	5.60999e-05	-0.000113815	-0.000131379	-9.6918e-05	-0.000160536	-0.00015117	-0.000187011	-4.63147e-05	-0.0001916	-0.000249989	-0.000255477	-1.07956e-05	-0.000120384	-0.00057757	-0.00125479	-0.00140958	-0.0029239	-0.00275513	-0.0033745	-0.00346751	-0.00246399	-0.00649325	-0.00560312	-0.00697225	-0.00776034	-0.00860718	-0.0157573	-0.000869048	0.00211004	-0.0296869	-0.0607524	-0.0732678	-0.151932	0.961658	0.0289714	-6.80531e-07	0.0132725
-2.1217e-06	-2.94484e-06	-2.8422e-06	-1.55391e-07	-1.75581e-05	4.47483e-05	-2.20706e-06	-1.28779e-08	5.66592e-07	5.4641e-06	2.59543e-05	7.97221e-05	1.08529e-05	-7.76736e-06	4.77702e-06	-5.1369e-06	-1.11803e-05	-7.65027e-06	-7.21672e-06	-8.96697e-06	-2.22858e-06	-9.25182e-06	-1.20838e-05	-1.24222e-05	-5.25413e-07	-1.03768e-06	-2.48764e-05	-6.01408e-05	-6.47655e-05	-0.000134112	-0.000122097	-0.000147905	-0.000146677	-0.000101972	-0.00026742	-0.000222412	-0.000253621	-0.000262791	-0.00025807	-0.000422833	-1.98255e-05	4.79522e-05	-0.000650951	-0.000348926	-0.000281796	-0.000368945	-0.000276133	-8.58141e-05	2.44675e-09	-4.96496e-05
-2.9031e-06	-4.14838e-06	-4.02207e-06	-2.20631e-07	-2.50448e-05	6.54769e-05	-2.83918e-06	-1.85092e-08	8.14736e-07	7.8842e-06	3.76584e-05	0.000115975	1.59201e-05	-1.18414e-05	8.04931e-06	-6.23086e-06	-1.57034e-05	-9.66895e-06	-9.12289e-06	-1.13425e-05	-2.82044e-06	-1.1715e-05	-1.53031e-05	-1.57434e-05	-6.65944e-07	-1.317e-06	-3.15485e-05	-7.63137e-05	-8.21862e-05	-0.000170186	-0.00015494	-0.00018769	-0.000186132	-0.000129402	-0.000339355	-0.000282241	-0.000321845	-0.000333483	-0.000327491	-0.000536576	-2.51586e-05	6.08514e-05	-0.000826058	-0.000442785	-0.000357597	-0.000468199	-0.000350414	-0.000108898	3.10489e-09	-6.30053e-05
-0.00279475	-0.00464276	-0.00460696	-0.000257017	-0.0298597	0.0884636	0.00112781	1.86629e-07	-7.91747e-06	-5.71891e-05	-0.000152598	-0.00030667	-8.99295e-06	0.000111937	-0.000886376	-0.0821744	0.695855	0.0110509	0.007841	0.00619364	0.0011181	0.00336326	0.00398133	0.00229891	8.95462e-05	0.000508142	0.00238162	0.000532866	0.00016717	0.000336652	0.000199888	0.000218361	0.00016544	0.000100791	0.000257347	0.000178959	0.000149549	0.000128846	0.000100426	0.000140948	5.58613e-06	-1.3467e-05	0.000177362	5.94029e-05	4.60718e-05	5.75798e-05	4.11171e-05	1.21253e-05	-3.44385e-10	6.91199e-06
0	0	0	0	0	0	0	0	0	0	0	0	0	0	0	0	0	0	0	0	0	0	0	0	0	0	0	0	0	0	0	0	0	0	0	0	0	0	0	0	0	0	0	0	0	0	0	0	0	0
-2.21324e-06	-1.58817e-06	-1.2988e-06	-6.156e-08	-5.46761e-06	-7.76612e-06	-6.10687e-06	-1.59376e-07	1.8653e-05	-9.48485e-06	-4.11519e-06	3.06307e-07	2.29129e-06	7.10253e-07	-7.46682e-06	-1.39275e-05	-1.0276e-05	-1.70296e-05	-1.60366e-05	-1.9839e-05	-4.9131e-06	-2.03236e-05	-2.65161e-05	-2.70893e-05	-1.14463e-06	-1.27533e-05	-6.11843e-05	-0.000130896	-0.000140856	-0.000291667	-0.000265477	-0.000321571	-0.000318844	-0.000221643	-0.000581244	-0.000483342	-0.000550979	-0.000570759	-0.000560291	-0.000917725	-4.30131e-05	0.000104035	-0.00141217	-0.00075579	-0.000610273	-0.000798914	-0.00059778	-0.000185726	5.29509e-09	-0.000107448
-7.75923e-07	-5.46484e-07	-4.45755e-07	-2.10888e-08	-1.86845e-06	-2.62239e-06	-1.64664e-06	-9.56516e-10	4.04012e-08	2.69963e-07	3.65691e-07	-3.78435e-08	-6.21875e-07	2.42497e-06	-4.8826e-06	2.03529e-06	-2.94064e-06	-6.1083e-06	-5.79992e-06	-7.32391e-06	1.63192e-05	-7.17019e-06	-9.41479e-06	-9.74318e-06	-4.12007e-07	-4.60727e-06	-2.21051e-05	-4.74022e-05	-5.09977e-05	-0.000105598	-9.60886e-05	-0.000116381	-0.00011536	-8.01777e-05	-0.000210252	-0.000174809	-0.000199124	-0.000206179	-0.000202302	-0.000329766	-1.54944e-05	3.74757e-05	-0.000508636	-0.000271385	-0.000219044	-0.000286677	-0.000214386	-6.65705e-05	-6.08836e-09	-3.85027e-05
-1.90107e-05	-1.33776e-05	-1.09108e-05	-5.16162e-07	-4.5728e-05	-6.41586e-05	-4.02156e-05	-2.33442e-08	9.86008e-07	6.5884e-06	8.92434e-06	-9.23518e-07	-1.51753e-05	5.91631e-05	-0.00011908	-0.000128435	-9.47181e-05	-0.000156362	-0.000147151	-0.000181869	-4.48393e-05	-0.000186109	-0.000242788	-0.000247931	-1.04759e-05	-0.000116751	-0.000560131	-0.0012151	-0.0013613	-0.00282345	-0.00265463	-0.0032491	-0.00333097	-0.00236358	-0.00622668	-0.00536027	-0.00663306	-0.00735438	-0.00817014	-0.0121095	-0.000768194	0.00186475	-0.0261654	-0.0388392	-0.0394375	-0.0639164	-0.0878751	-0.160355	0.601578	-0.416289
0	0	0	0	0	0	0	0	0	0	0	0	0	0	0	0	0	0	0	0	0	0	0	0	0	0	0	0	0	0	0	0	0	0	0	0	0	0	0	0	0	0	0	0	0	0	0	0	0	0
-3.21793e-06	-2.26441e-06	-1.84686e-06	-8.73699e-08	-7.7403e-06	-1.086e-05	-6.80717e-06	-3.95139e-09	1.66898e-07	1.11519e-06	1.51059e-06	-1.56321e-07	-2.56866e-06	1.00143e-05	-2.01563e-05	-2.17383e-05	-1.60308e-05	-2.64613e-05	-2.49018e-05	-3.07748e-05	-7.58911e-06	-3.14866e-05	-4.10741e-05	-4.19306e-05	-1.77159e-06	-1.97285e-05	-9.46471e-05	-0.000202455	-0.000218097	-0.000451629	-0.000411468	-0.000498569	-0.000494868	-0.000344246	-0.000902905	-0.000751798	-0.000860234	-0.000895278	-0.000897229	-0.00109972	-6.54197e-05	0.000158434	-0.00215503	-0.00117683	-0.000951873	-0.00124775	-0.000937481	-0.000296712	-6.89089e-07	-0.000184181
-3.79877e-05	-2.67337e-05	-2.18043e-05	-1.03151e-06	-9.13842e-05	-0.00012822	-8.03833e-05	-4.66636e-08	1.97097e-06	1.31698e-05	1.78393e-05	-1.84607e-06	-3.03347e-05	0.000118267	-0.000238049	-0.000226676	-0.000185491	-0.000311426	-0.000293307	-0.000363191	-1.47518e-05	-0.00037042	-0.00048351	-0.000494529	-2.08988e-05	-0.000233256	-0.00111915	-0.0024792	-0.00295473	-0.00614462	-0.00610285	-0.00760955	-0.0083132	-0.00615338	-0.0163692	-0.0152689	-0.023703	-0.0338806	-0.0803884	0.884297	0.00382263	-0.00906729	0.104606	0.0139928	0.0101073	0.012779	0.00875633	0.00283105	-0.00155143	0.00243139
0	0	0	0	0	0	0	0	0	0	0	0	0	0	0	0	0	0	0	0	0	0	0	0	0	0	0	0	0	0	0	0	0	0	0	0	0	0	0	0	0	0	0	0	0	0	0	0	0	0
0	0	0	0	0	0	0	0	0	0	0	0	0	0	0	0	0	0	0	0	0	0	0	0	0	0	0	0	0	0	0	0	0	0	0	0	0	0	0	0	0	0	0	0	0	0	0	0	0	0
-1.8915e-05	-1.33103e-05	-1.08559e-05	-5.13564e-07	-4.54978e-05	-6.38356e-05	-4.00131e-05	-2.32267e-08	9.81043e-07	6.55523e-06	8.8794e-06	-9.18868e-07	-1.50988e-05	5.88652e-05	-0.000118481	-0.000127858	-9.425e-05	-0.000155577	-0.000146412	-0.000180954	-4.47867e-05	-0.000185175	-0.000241569	-0.000246684	-1.04232e-05	-0.000116163	-0.000557309	-0.00120881	-0.00135369	-0.00280762	-0.00263884	-0.00322941	-0.00330958	-0.00234789	-0.00618505	-0.00532275	-0.00643096	-0.00725796	-0.00797203	-0.0144963	-0.00116043	0.00464728	-0.0237865	-0.0371246	-0.0372512	-0.0595446	-0.0772247	-0.086053	0.000701356	-0.201148
0	0	0	0	0	0	0	0	0	0	0	0	0	0	0	0	0	0	0	0	0	0	0	0	0	0	0	0	0	0	0	0	0	0	0	0	0	0	0	0	0	0	0	0	0	0	0	0	0	0
0	0	0	0	0	0	0	0	0	0	0	0	0	0	0	0	0	0	0	0	0	0	0	0	0	0	0	0	0	0	0	0	0	0	0	0	0	0	0	0	0	0	0	0	0	0	0	0	0	0
0	0	0	0	0	0	0	0	0	0	0	0	0	0	0	0	0	0	0	0	0	0	0	0	0	0	0	0	0	0	0	0	0	0	0	0	0	0	0	0	0	0	0	0	0	0	0	0	0	0
-1.90107e-05	-1.33775e-05	-1.09109e-05	-5.16164e-07	-4.57282e-05	-6.4159e-05	-4.02163e-05	-2.33447e-08	9.86027e-07	6.58853e-06	8.92451e-06	-9.23547e-07	-1.51756e-05	5.91643e-05	-0.000119083	-0.000128526	-9.47441e-05	-0.000156413	-0.000147205	-0.000181952	-4.50383e-05	-0.000186242	-0.000242974	-0.000248229	-1.04894e-05	-0.000117027	-0.000561483	-0.00124221	-0.00147631	-0.00306981	-0.003045	-0.00379673	-0.0041588	-0.00309463	-0.00824717	-0.007893	0.031611	-0.00937157	-0.01674	-0.0502655	-0.0762202	0.540369	0.442532	0.0114049	0.00835331	0.0105186	0.00711364	0.00251117	0.00155925	0.00264321
-1.90107e-05	-1.33776e-05	-1.09108e-05	-5.16161e-07	-4.5728e-05	-6.41585e-05	-4.02156e-05	-2.33442e-08	9.86006e-07	6.58839e-06	8.92432e-06	-9.23516e-07	-1.51752e-05	5.9163e-05	-0.00011908	-0.000128505	-9.47269e-05	-0.000156364	-0.000147153	-0.00018187	-4.50135e-05	-0.000186113	-0.000242792	-0.000247934	-1.0476e-05	-0.000116752	-0.000560137	-0.00121509	-0.00136121	-0.00282325	-0.00265432	-0.00324866	-0.00333036	-0.00236311	-0.00622541	-0.00535933	-0.0064808	-0.00731964	-0.00805082	-0.014661	-0.00117526	0.004704	-0.0241299	-0.0388073	-0.0394102	-0.0638725	-0.0878237	-0.160181	-0.601114	-0.417121
0	0	0	0	0	0	0	0	0	0	0	0	0	0	0	0	0	0	0	0	0	0	0	0	0	0	0	0	0	0	0	0	0	0	0	0	0	0	0	0	0	0	0	0	0	0	0	0	0	0
-1.90107e-05	-1.33776e-05	-1.09108e-05	-5.16161e-07	-4.5728e-05	-6.41585e-05	-4.02156e-05	-2.33442e-08	9.86006e-07	6.58839e-06	8.92432e-06	-9.23516e-07	-1.51752e-05	5.9163e-05	-0.00011908	-0.000128505	-9.47269e-05	-0.000156364	-0.000147153	-0.00018187	-4.50134e-05	-0.000186113	-0.000242792	-0.000247933	-1.04759e-05	-0.000116752	-0.000560133	-0.00121502	-0.00136089	-0.00282257	-0.00265321	-0.00324709	-0.0033279	-0.00236089	-0.00621925	-0.00535135	-0.00661093	-0.00731215	-0.00801542	-0.0145008	-0.000785894	0.00191547	-0.0266356	-0.0395438	-0.0402879	-0.0655575	-0.0916981	-0.191553	-0.372645	0.549487
0	0	0	0	0	0	0	0	0	0	0	0	0	0	0	0	0	0	0	0	0	0	0	0	0	0	0	0	0	0	0	0	0	0	0	0	0	0	0	0	0	0	0	0	0	0	0	0	0	0
-1.90107e-05	-1.33776e-05	-1.09108e-05	-5.16161e-07	-4.5728e-05	-6.41585e-05	-4.02156e-05	-2.33442e-08	9.86006e-07	6.58839e-06	8.92432e-06	-9.23516e-07	-1.51752e-05	5.9163e-05	-0.00011908	-0.000128505	-9.47268e-05	-0.000156364	-0.000147153	-0.00018187	-4.50131e-05	-0.000186113	-0.000242792	-0.000247933	-1.04759e-05	-0.000116752	-0.000560133	-0.00121502	-0.00136089	-0.00282257	-0.00265321	-0.00324709	-0.0033279	-0.00236089	-0.00621926	-0.00535135	-0.00661134	-0.00731225	-0.00801582	-0.0144912	-0.000784094	0.00190287	-0.026645	-0.0395442	-0.0402884	-0.0655585	-0.0917001	-0.191581	0.371341	0.550957
0	0	0	0	0	0	0	0	0	0	0	0	0	0	0	0	0	0	0	0	0	0	0	0	0	0	0	0	0	0	0	0	0	0	0	0	0	0	0	0	0	0	0	0	0	0	0	0	0	0
-0.00557398	-0.0052239	-0.00440834	-0.000213502	-0.0195017	-0.0313761	-0.0721212	-0.00663928	0.785141	-0.432102	-0.215596	0.0172493	0.16736	-0.244184	0.235884	0.0059855	0.00401169	0.00370723	0.0030363	0.00288606	0.000576516	0.00187981	0.00227212	0.00144005	5.66499e-05	0.000340623	0.00160016	0.000378725	0.000119382	0.000240427	0.000142851	0.000156072	0.00011828	7.20679e-05	0.000184012	0.00012798	0.000106941	9.21653e-05	7.18436e-05	0.000100838	3.99649e-06	-9.63399e-06	0.000126896	4.2458e-05	3.28428e-05	4.16865e-05	2.94743e-05	8.68659e-06	-2.4468e-10	4.95135e-06
-3.58308e-06	-5.12005e-06	-4.96416e-06	-2.7231e-07	-3.0911e-05	8.0814e-05	-3.50415e-06	-2.28447e-08	1.00557e-06	9.73094e-06	4.64792e-05	0.00014314	1.96491e-05	-1.46151e-05	9.93491e-06	-7.69015e-06	-1.93815e-05	-1.19335e-05	-1.12596e-05	-1.3999e-05	-3.48102e-06	-1.44587e-05	-1.88872e-05	-1.94306e-05	-8.21915e-07	-1.62545e-06	-3.89375e-05	-9.41871e-05	-0.000101435	-0.000210045	-0.000191229	-0.00023165	-0.000229726	-0.00015971	-0.000418836	-0.000348345	-0.000397225	-0.000411588	-0.000404192	-0.000662247	-3.10511e-05	7.51034e-05	-0.00101953	-0.00054649	-0.00044135	-0.000577856	-0.000432484	-0.000134403	3.83208e-09	-7.77618e-05
0	0	0	0	0	0	0	0	0	0	0	0	0	0	0	0	0	0	0	0	0	0	0	0	0	0	0	0	0	0	0	0	0	0	0	0	0	0	0	0	0	0	0	0	0	0	0	0	0	0
0	0	0	0	0	0	0	0	0	0	0	0	0	0	0	0	0	0	0	0	0	0	0	0	0	0	0	0	0	0	0	0	0	0	0	0	0	0	0	0	0	0	0	0	0	0	0	0	0	0
0	0	0	0	0	0	0	0	0	0	0	0	0	0	0	0	0	0	0	0	0	0	0	0	0	0	0	0	0	0	0	0	0	0	0	0	0	0	0	0	0	0	0	0	0	0	0	0	0	0
0	0	0	0	0	0	0	0	0	0	0	0	0	0	0	0	0	0	0	0	0	0	0	0	0	0	0	0	0	0	0	0	0	0	0	0	0	0	0	0	0	0	0	0	0	0	0	0	0	0
-2.2499e-05	-1.58324e-05	-1.2913e-05	-6.10879e-07	-5.41193e-05	-7.59321e-05	-4.75961e-05	-2.76286e-08	1.16697e-06	7.79756e-06	1.05622e-05	-1.09301e-06	-1.79604e-05	7.00214e-05	-0.000140936	-0.00015212	-0.000112137	-0.000185135	-0.000174239	-0.000215375	-5.33135e-05	-0.000220473	-0.000287638	-0.000293907	-1.242e-05	-0.000138621	-0.0006651	-0.00148232	-0.00177997	-0.00374507	-0.00381017	-0.00479329	-0.00549668	-0.00617512	-0.00659091	-0.00986432	-0.0175729	-0.0305988	0.702375	0.055537	0.00117618	-0.00281139	0.034459	0.00622595	0.00466566	0.00579644	0.00395141	0.00112883	-3.15816e-08	0.000638111
-0.00130976	-0.00103368	-0.000855252	-4.08648e-05	-0.00366793	-0.00546361	-0.00633147	-8.02562e-06	0.00034096	0.00238023	0.00347438	-0.000373184	-0.00695395	0.0658467	0.0685936	-0.00627036	-0.00479735	-0.0107407	-0.0113044	-0.0189525	-0.00729915	-0.124734	0.986972	0.0170298	0.000604227	0.00226299	0.0105345	0.00181025	0.000557267	0.001122	0.000664459	0.000725518	0.000549114	0.000334398	0.00085374	0.000593414	0.000495448	0.000426826	0.000332576	0.000466684	1.84917e-05	-4.45762e-05	0.000587122	0.000196338	0.000151868	0.000192756	0.000136279	4.01617e-05	-1.13124e-09	2.28918e-05
-2.2499e-05	-1.58324e-05	-1.2913e-05	-6.10879e-07	-5.41193e-05	-7.59321e-05	-4.75961e-05	-2.76286e-08	1.16697e-06	7.79756e-06	1.05622e-05	-1.09301e-06	-1.79604e-05	7.00214e-05	-0.000140936	-0.00015212	-0.000112137	-0.000185135	-0.000174239	-0.000215375	-5.33135e-05	-0.000220473	-0.000287638	-0.000293907	-1.242e-05	-0.000138621	-0.0006651	-0.00148232	-0.00177997	-0.00374507	-0.00381017	-0.00479329	-0.00549668	-0.00617512	-0.00659091	-0.00986432	-0.0175729	-0.0305988	0.702375	0.055537	0.00117618	-0.00281139	0.034459	0.00622595	0.00466566	0.00579644	0.00395141	0.00112883	-3.15816e-08	0.000638111
-0.00551961	-0.00515017	-0.00434426	-0.000210353	-0.0192126	-0.0305654	-0.0660723	-0.000406201	0.0178557	0.169802	0.699701	-0.358961	0.419357	-0.316379	0.265734	0.00603396	0.00404562	0.00373283	0.00305675	0.00290476	0.000580155	0.0018914	0.00228604	0.00144859	5.69847e-05	0.000342499	0.00160933	0.000380856	0.000120049	0.000241771	0.000143647	0.000156941	0.000118937	7.24675e-05	0.000185032	0.000128687	0.000107528	9.26695e-05	7.22339e-05	0.000101383	4.01792e-06	-9.68565e-06	0.000127576	4.26787e-05	3.30129e-05	4.19018e-05	2.96257e-05	8.731e-06	-2.45929e-10	4.97663e-06
0	0	0	0	0	0	0	0	0	0	0	0	0	0	0	0	0	0	0	0	0	0	0	0	0	0	0	0	0	0	0	0	0	0	0	0	0	0	0	0	0	0	0	0	0	0	0	0	0	0
0	0	0	0	0	0	0	0	0	0	0	0	0	0	0	0	0	0	0	0	0	0	0	0	0	0	0	0	0	0	0	0	0	0	0	0	0	0	0	0	0	0	0	0	0	0	0	0	0	0
8.2478e-05	-1.4092e-05	-1.15625e-05	-5.48866e-07	-4.88103e-05	-6.92637e-05	-4.43356e-05	-2.59608e-08	1.09711e-06	7.41665e-06	9.77261e-06	-1.01547e-06	-1.67421e-05	6.54268e-05	-0.000131873	-0.000144006	-0.000106171	-0.000175389	-0.000165078	-0.000204063	-5.0512e-05	-0.000208864	-0.000272478	-0.000278253	-1.1757e-05	-0.000130995	-0.000628458	-0.00135409	-0.00148996	-0.0030884	-0.00238691	-0.00343227	-0.00293368	-0.00241374	-0.00635296	-0.00538918	-0.00637713	-0.00678572	-0.00696964	-0.0118484	-0.000583461	0.00141276	-0.0193715	-0.0130446	-0.010861	-0.0145567	-0.0114121	-0.00372056	1.07327e-07	-0.0021838
0.576095	0.00517971	0.00384164	0.000171339	0.0141534	0.015531	0.00467992	2.27622e-06	-9.60787e-05	-0.000638905	-0.000858897	8.85707e-05	0.00144001	-0.00538178	0.0101079	0.00172091	0.001168	0.00114318	0.00094553	0.000912733	0.000184174	0.000605987	0.000734296	0.00047114	1.85606e-05	0.000112663	0.000529397	0.000129317	4.75165e-05	9.69715e-05	-0.000578191	-1.1276e-06	2.61111e-05	1.76773e-05	4.57748e-05	3.39594e-05	3.00154e-05	2.63873e-05	2.09648e-05	2.975e-05	1.19264e-06	-2.87566e-06	3.79561e-05	1.32163e-05	1.02754e-05	1.30937e-05	9.33127e-06	2.77309e-06	-7.82724e-11	1.58468e-06
-0.00554764	-0.00518704	-0.00437581	-0.000211878	-0.0193474	-0.0310811	-0.0692706	-0.00084009	0.0386171	0.726448	-0.524513	0.0317023	0.229312	-0.272104	0.248429	0.00600767	0.0040262	0.00371948	0.00304625	0.00289551	0.000578427	0.00188622	0.00227997	0.00144563	5.68742e-05	0.000342372	0.00160846	0.000390161	0.000137319	0.000278384	0.000204158	0.000254624	-0.00257779	-3.09995e-05	-3.98399e-05	4.6247e-05	6.5564e-05	6.20049e-05	5.15306e-05	7.43171e-05	3.00905e-06	-7.25629e-06	9.58809e-05	3.31755e-05	2.57143e-05	3.26833e-05	2.31633e-05	6.8405e-06	-1.92765e-10	3.9012e-06
0.577081	0.00518858	0.00384822	0.000171633	0.0141777	0.0155576	0.00468793	2.28011e-06	-9.62432e-05	-0.000639999	-0.000860367	8.87223e-05	0.00144247	-0.00539099	0.0101252	0.00172386	0.00117	0.00114514	0.000947148	0.000914295	0.000184489	0.000607024	0.000735553	0.000471947	1.85924e-05	0.000112856	0.000530303	0.000129538	4.75978e-05	9.71375e-05	-0.00057918	-1.12953e-06	2.61558e-05	1.77076e-05	4.58532e-05	3.40176e-05	3.00668e-05	2.64324e-05	2.10007e-05	2.98009e-05	1.19468e-06	-2.88058e-06	3.80211e-05	1.32389e-05	1.0293e-05	1.31161e-05	9.34724e-06	2.77784e-06	-7.84063e-11	1.5874e-06
0.577185	0.00518951	0.00384891	0.000171664	0.0141802	0.0155604	0.00468877	2.28052e-06	-9.62605e-05	-0.000640114	-0.000860522	8.87383e-05	0.00144273	-0.00539196	0.010127	0.00172417	0.00117021	0.00114534	0.000947319	0.00091446	0.000184523	0.000607133	0.000735685	0.000472032	1.85957e-05	0.000112876	0.000530398	0.000129562	4.76064e-05	9.7155e-05	-0.000579284	-1.12973e-06	2.61605e-05	1.77108e-05	4.58614e-05	3.40237e-05	3.00722e-05	2.64372e-05	2.10045e-05	2.98063e-05	1.1949e-06	-2.8811e-06	3.80279e-05	1.32413e-05	1.02949e-05	1.31185e-05	9.34892e-06	2.77834e-06	-7.84204e-11	1.58768e-06
-0.0113105	0.694265	0.0571447	0.00168755	0.101288	0.0610073	0.00998644	4.5456e-06	-0.000191827	-0.00127359	-0.00170787	0.000175918	0.00285034	-0.0105135	0.0193546	0.0026719	0.00180835	0.00174658	0.00144123	0.00138604	0.000278982	0.00091583	0.00110902	0.000709212	2.79279e-05	0.000168992	0.000794	0.000189167	5.96776e-05	0.000120189	7.14333e-05	7.80525e-05	5.9173e-05	3.60633e-05	9.2087e-05	6.40852e-05	5.2178e-05	4.6114e-05	3.60644e-05	5.09039e-05	2.78835e-06	-1.04246e-05	5.88131e-05	2.10998e-05	1.63262e-05	2.07255e-05	1.46565e-05	4.31519e-06	-1.64856e-08	2.44694e-06
-0.0113105	0.694265	0.0571447	0.00168755	0.101288	0.0610073	0.00998644	4.5456e-06	-0.000191827	-0.00127359	-0.00170787	0.000175918	0.00285034	-0.0105135	0.0193546	0.0026719	0.00180835	0.00174658	0.00144123	0.00138604	0.000278982	0.00091583	0.00110902	0.000709212	2.79279e-05	0.000168992	0.000794	0.000189167	5.96776e-05	0.000120189	7.14333e-05	7.80525e-05	5.9173e-05	3.60633e-05	9.2087e-05	6.40852e-05	5.2178e-05	4.6114e-05	3.60644e-05	5.09039e-05	2.78835e-06	-1.04246e-05	5.88131e-05	2.10998e-05	1.63262e-05	2.07255e-05	1.46565e-05	4.31519e-06	-1.64856e-08	2.44694e-06
-6.87602e-05	-5.18684e-05	-4.26982e-05	-2.03315e-06	-0.000181687	-0.000265595	-0.000301566	-2.34519e-06	0.000107557	0.00198953	-0.00139783	8.34014e-05	0.000579265	-0.000571071	0.000337535	-0.000347077	-0.000256959	-0.000432393	-0.000408247	-0.000507191	-0.000125976	-0.000522628	-0.000682475	-0.000700979	-2.96437e-05	-0.000333066	-0.00159845	-0.00387867	-0.00650638	-0.0137794	-0.022472	-0.0361886	0.993833	0.0380513	0.0826673	0.0302352	0.0153415	0.011194	0.00754643	0.0098575	0.000367166	-0.000884124	0.0115334	0.00345339	0.00265204	0.00334943	0.00234784	0.000686778	-1.9313e-08	0.000390674
0.0010252	-3.5712e-05	-2.98515e-05	-1.43187e-06	-0.000128794	-0.000188894	-0.000127976	-7.51226e-08	3.17313e-06	2.12084e-05	2.87403e-05	-2.97472e-06	-4.89099e-05	0.000191124	-0.00038606	-0.000434494	-0.000320513	-0.000531091	-0.000500223	-0.000619214	-0.000153463	-0.000635529	-0.000829537	-0.00085067	-3.59712e-05	-0.000404574	-0.00194181	-0.00500665	-0.0121647	-0.0265184	0.99497	0.0847851	0.021424	0.0103035	0.0253106	0.0143211	0.00954023	0.00751904	0.00539153	0.00724746	0.00027645	-0.000665958	0.00871897	0.00271807	0.00209272	0.0026477	0.00186164	0.000546012	-1.53635e-08	0.000310823
0	0	0	0	0	0	0	0	0	0	0	0	0	0	0	0	0	0	0	0	0	0	0	0	0	0	0	0	0	0	0	0	0	0	0	0	0	0	0	0	0	0	0	0	0	0	0	0	0	0
[truncated: 86 more columns]

## Sheet: Time Course
# Time	Secretory Granules	Depletion of Lysosome	ER Stress	proInsulin	RAS	Fructose 1,6-bisphosphate	ATP	IKab	IRS1	NLRP3	IL1β	Caspase 3/6/7	Beta Cell Death	Citrate	proIAPP	Ca+	CytoC	PKC	Phosphoenolpyruvate	Caspase 1	AKT	PIP2	Rheb	eIF4E	S6K	MEK	Caspase 8	GLUCOSE	AUTOPHAGY DEFECT	Succinate	Malate	IRE1α	ATF4	hIAPP monomer	α ketoglutarate	Gleceraldehyde 3-phosphate	Caspase 9	SHP2	GαS/GαQ	Polyubiquitinated Proteins	3-Phosphoglycerate	ROS	Acetyl CoA	Fructose-6-Phosphate	JAK	ERK1/2	Ribosomal S6	Caspase 2	DHAP
0	85000	77900	89000	90000	37000	60000	58300	20000	49000	59900	91000	89000	148000	20000	90000	45000	77000	30000	20000	69000	49000	19800	10000	5000	9900	29600	25000	49000	105000	10000	10000	37000	35000	69000	10000	49000	69000	8959	50000	35000	19000	70000	10000	10000	19000	39000	19000	25000	49000
1	85153.1	78421.7	89722.1	90458.2	37068.6	60145.9	58198.2	19813.4	49231.5	60074.3	91926.6	89000.2	149591	20101.2	90458.2	44810.9	77074.3	30108.9	19807.2	69507.9	48998.3	19701.1	9877.08	4950.74	9801.76	29500.4	24764.3	49000	106105	10000	10000	36821.7	34901.3	69000.7	10000	49398	69000	8880.7	50039.7	35359.6	18999.1	70446.6	10000.4	9901.87	18792.2	38979.6	18900.3	25060.1	48802.9
2	85306.2	78943.3	90444.3	90916.4	37137.2	60291.8	58096.4	19626.9	49462.9	60248.5	92853.2	89000.4	151182	20202.4	90916.4	44621.8	77148.6	30217.8	19614.4	70015.9	48996.6	19602.3	9754.19	4901.5	9703.54	29400.9	24528.6	49000.1	107210	10000	10000	36643.3	34802.5	69001.3	10000	49796.1	69000	8802.41	50079.5	35719.3	18998.1	70893.2	10000.8	9803.76	18584.5	38959.1	18800.7	25120.2	48605.8
3	85459.3	79464.9	91166.4	91374.6	37205.8	60437.7	57994.5	19440.4	49694.4	60422.8	93779.8	89000.6	152773	20303.7	91374.6	44432.8	77222.9	30326.7	19421.7	70523.8	48994.9	19503.4	9631.32	4852.26	9605.35	29301.3	24293	49000.1	108315	10000	10000	36465	34703.7	69002	10000	50194.1	69000	8724.14	50119.2	36078.9	18997.1	71339.7	10001.1	9705.68	18376.8	38938.7	18701	25180.3	48408.8
4	85612.4	79986.3	91888.6	91832.7	37274.3	60583.5	57892.5	19253.9	49925.8	60597	94706.4	89000.8	154363	20404.9	91832.7	44243.7	77297.2	30435.5	19229	71031.7	48993.2	19404.6	9508.48	4803.02	9507.18	29201.7	24057.4	49000.1	109419	10000	10000	36286.6	34605	69002.7	10000	50592.1	69000	8645.88	50159	36438.6	18996.1	71786.2	10001.5	9607.61	18169.1	38918.2	18601.3	25240.4	48211.8
5	85765.5	80507.6	92610.8	92290.8	37342.9	60729.4	57790.5	19067.4	50157.3	60771.2	95632.9	89001	155954	20506.1	92290.8	44054.7	77371.4	30544.4	19036.4	71539.6	48991.4	19305.7	9385.67	4753.8	9409.03	29102.1	23821.9	49000.2	110524	10000	10000	36108.3	34506.2	69003.4	10000	50990.2	69000	8567.65	50198.7	36798.2	18995.1	72232.6	10001.9	9509.57	17961.4	38897.7	18501.7	25300.5	48014.8
6	85918.6	81028.8	93332.9	92748.8	37411.4	60875.2	57688.5	18881	50388.7	60945.4	96559.5	89001.2	157545	20607.3	92748.8	43865.7	77445.7	30653.3	18843.8	72047.5	48989.6	19206.9	9262.89	4704.58	9310.9	29002.5	23586.4	49000.2	111629	10000	10000	35929.9	34407.3	69004.1	10000	51388.2	69000	8489.43	50238.4	37157.9	18994	72679	10002.3	9411.55	17753.8	38877.2	18402	25360.6	47817.8
7	86071.7	81549.9	94055.1	93206.9	37479.9	61021	57586.4	18694.7	50620.2	61119.5	97486	89001.4	159136	20708.5	93206.9	43676.7	77519.9	30762.2	18651.3	72555.4	48987.8	19108.1	9140.14	4655.37	9212.8	28902.9	23350.9	49000.2	112734	10000	10000	35751.5	34308.5	69004.8	10000	51786.3	69000	8411.23	50278.2	37517.5	18993	73125.3	10002.7	9313.55	17546.2	38856.8	18302.3	25420.6	47620.8
8	86224.8	82070.9	94777.3	93664.9	37548.4	61166.8	57484.2	18508.3	50851.6	61293.7	98412.5	89001.6	160726	20809.8	93664.9	43487.7	77594.2	30871	18458.8	73063.3	48985.9	19009.3	9017.43	4606.17	9114.72	28803.4	23115.5	49000.3	113838	10000	10000	35573.2	34209.6	69005.5	10000	52184.4	69000	8333.04	50317.9	37877.2	18991.9	73571.6	10003.1	9215.57	17338.6	38836.3	18202.5	25480.7	47423.9
9	86377.9	82591.8	95499.5	94122.8	37616.8	61312.6	57382	18322	51083	61467.8	99339	89001.9	162317	20911	94122.8	43298.7	77668.4	30979.9	18266.3	73571.2	48984	18910.5	8894.74	4556.98	9016.66	28703.8	22880.2	49000.3	114943	10000	10000	35394.8	34110.8	69006.2	10000	52582.4	69000	8254.88	50357.6	38236.8	18990.8	74017.8	10003.5	9117.62	17131.1	38815.8	18102.8	25540.7	47227
10	86531	83112.6	96221.7	94580.8	37685.3	61458.3	57279.7	18135.7	51314.5	61641.9	100266	89002.1	163908	21012.2	94580.8	43109.8	77742.6	31088.8	18073.9	74079.1	48982.1	18811.7	8772.09	4507.8	8918.63	28604.2	22644.9	49000.4	116048	10000	10000	35216.4	34011.9	69006.9	10000	52980.5	69000	8176.73	50397.4	38596.5	18989.6	74464	10003.9	9019.69	16923.5	38795.2	18003.1	25600.8	47030.2
11	86684.1	83633.3	96943.9	95038.7	37753.7	61604	57177.3	17949.5	51545.9	61815.9	101192	89002.3	165498	21113.4	95038.7	42920.8	77816.8	31197.7	17881.5	74587	48980.1	18712.9	8649.47	4458.62	8820.63	28504.6	22409.6	49000.4	117152	10000	10000	35038.1	33912.9	69007.6	10000	53378.6	69000	8098.6	50437.1	38956.2	18988.5	74910.1	10004.2	8921.79	16716.1	38774.7	17903.3	25660.8	46833.3
12	86837.2	84153.9	97666.1	95496.5	37822.1	61749.8	57074.9	17763.3	51777.4	61990	102118	89002.5	167089	21214.6	95496.5	42731.9	77891	31306.5	17689.2	75094.8	48978.1	18614.2	8526.89	4409.46	8722.65	28405	22174.4	49000.4	118257	10000	10000	34859.7	33814	69008.3	10000	53776.6	69000	8020.49	50476.8	39315.8	18987.3	75356.1	10004.6	8823.91	16508.6	38754.2	17803.6	25720.8	46636.5
13	86990.3	84674.3	98388.3	95954.4	37890.5	61895.4	56972.4	17577.1	52008.8	62164	103045	89002.7	168679	21315.8	95954.4	42543	77965.2	31415.4	17496.9	75602.7	48976.1	18515.4	8404.34	4360.3	8624.7	28305.4	21939.2	49000.5	119361	10000	10000	34681.3	33715	69009	10000	54174.7	69000	7942.4	50516.6	39675.5	18986.1	75802.1	10005	8726.06	16301.2	38733.7	17703.8	25780.8	46439.7
14	87143.3	85194.7	99110.6	96412.1	37958.9	62041.1	56869.9	17391	52240.3	62337.9	103971	89003	170270	21417	96412.1	42354.1	78039.4	31524.3	17304.7	76110.5	48974	18416.7	8281.83	4311.15	8526.78	28205.8	21704.1	49000.5	120466	10000	10000	34502.9	33616	69009.8	10000	54572.8	69000	7864.33	50556.3	40035.1	18984.9	76248	10005.4	8628.23	16093.8	38713.1	17604	25840.8	46243
15	87296.4	85714.9	99832.8	96869.9	38027.2	62186.8	56767.3	17205	52471.7	62511.9	104898	89003.2	171861	21518.2	96869.9	42165.2	78113.5	31633.2	17112.6	76618.4	48971.9	18318	8159.36	4262.02	8428.88	28106.2	21469	49000.5	121570	10000	10000	34324.5	33517	69010.5	10000	54970.9	69000	7786.28	50596	40394.8	18983.6	76693.9	10005.8	8530.43	15886.5	38692.6	17504.2	25900.8	46046.2
16	87449.5	86235	100555	97327.6	38095.6	62332.4	56664.6	17018.9	52703.1	62685.8	105824	89003.4	173451	21619.4	97327.6	41976.4	78187.7	31742	16920.4	77126.2	48969.8	18219.2	8036.92	4212.89	8331.01	28006.6	21234	49000.6	122675	10000	10000	34146.1	33417.9	69011.2	10000	55369	69000	7708.26	50635.7	40754.5	18982.3	77139.7	10006.2	8432.66	15679.2	38672	17404.4	25960.7	45849.5
17	87602.6	86755	101277	97785.3	38163.9	62478	56561.8	16832.9	52934.6	62859.7	106750	89003.6	175041	21720.6	97785.3	41787.5	78261.8	31850.9	16728.4	77634.1	48967.6	18120.5	7914.53	4163.77	8233.17	27906.9	20999	49000.6	123779	10000	10000	33967.7	33318.9	69012	10000	55767.1	69000	7630.25	50675.4	41114.1	18981	77585.4	10006.6	8334.92	15471.9	38651.4	17304.6	26020.7	45652.8
18	87755.7	87274.9	102000	98242.9	38232.2	62623.6	56459	16647	53166	63033.6	107677	89003.9	176632	21821.8	98242.9	41598.7	78336	31959.8	16536.4	78141.9	48965.4	18021.9	7792.18	4114.66	8135.36	27807.3	20764.1	49000.6	124884	10000	10000	33789.3	33219.8	69012.7	10000	56165.2	69000	7552.26	50715.2	41473.8	18979.7	78031.1	10007	8237.2	15264.7	38630.8	17204.8	26080.6	45456.2
19	87908.7	87794.7	102722	98700.5	38300.4	62769.1	56356.1	16461.1	53397.5	63207.4	108603	89004.1	178222	21923	98700.5	41409.9	78410.1	32068.6	16344.4	78649.7	48963.2	17923.2	7669.88	4065.57	8037.58	27707.7	20529.3	49000.7	125988	10000	10000	33610.8	33120.6	69013.5	10000	56563.3	69000	7474.3	50754.9	41833.5	18978.3	78476.7	10007.4	8139.51	15057.5	38610.3	17105	26140.5	45259.6
20	88061.8	88314.4	103444	30000	38368.7	62914.6	56253.1	16275.2	53628.9	63381.3	109530	89004.3	179813	22024.2	30000	41221.1	78484.2	32177.5	16152.5	79157.6	20000	17824.5	7547.61	4016.48	7939.83	27608.1	20294.5	49000.7	127093	10000	10000	0	33021.5	69014.2	10000	56961.4	69000	7396.36	50794.6	42193.1	18976.9	78922.2	10007.8	8041.85	14850.4	38589.7	17005.1	26200.5	45063
21	88212.8	88833.9	103986	30458.9	38436.9	63060.1	56150.1	16089.4	53860.3	63555	110456	89004.6	181403	22125.4	30458.9	41032.3	78558.3	32286.4	15960.7	79665.4	20001.3	17725.9	7425.4	3967.41	7842.11	27508.5	20059.7	49000.7	128197	10000	10000	178.512	32922.3	69015	10000	57359.5	69000	7318.44	50834.3	42552.1	18975.5	79367.7	10008.2	7944.22	14643.3	38569	16905.2	26260.4	44866.4
22	88363.9	89353.3	104601	30917.7	38505.1	63205.6	56046.9	15903.6	54091.8	63728.8	111382	89004.8	182993	22226.6	30917.7	40843.6	78632.4	32395.2	15768.9	80173.2	20002.6	17627.2	7303.23	3918.34	7744.43	27408.8	19825.1	49000.8	129301	10000	10000	261.305	32823	69015.8	10000	57757.6	69000	7240.55	50874	42911	18974	79813.1	10008.6	7846.63	14436.2	38548.4	16805.3	26320.3	44669.8
23	88515	89872.6	105239	31376.5	38573.3	63351.1	55943.7	15717.9	54323.2	63902.5	112308	89005	184584	22327.8	31376.5	40654.8	78706.5	32504.1	15577.2	80680.9	20003.9	17528.6	7181.11	3869.29	7646.78	27309.2	19590.4	49000.8	130405	10000	10000	311.894	32723.8	69016.5	10000	58155.7	69000	7162.68	50913.7	43270	18972.6	80258.4	10009	7749.06	14229.2	38527.8	16705.4	26380.1	44473.3
24	88666.1	90391.7	105891	31835.2	38641.4	63496.5	55840.4	15532.2	54554.6	64076.2	113235	89005.3	186174	22429	31835.2	40466.1	78780.6	32612.9	15385.6	81188.7	20005.1	17430	7059.04	3820.25	7549.16	27209.6	19355.9	49000.9	131509	10000	10000	345.756	32624.5	69017.3	10000	58553.8	69000	7084.83	50953.4	43629	18971.1	80703.7	10009.4	7651.53	14022.2	38507.2	16605.5	26440	44276.8
25	88817.3	90910.7	106551	32293.8	38709.5	63641.9	55737	15346.6	54786.1	64249.8	114161	89005.5	187764	22530.2	32293.8	40277.4	78854.6	32721.8	15194	81696.5	20006.2	17331.4	6937.02	3771.22	7451.57	27109.9	19121.4	49000.9	132614	10000	10000	369.493	32525.2	69018.1	10000	58952	69000	7007.01	50993.1	43988	18969.5	81148.8	10009.8	7554.03	13815.3	38486.5	16505.6	26499.8	44080.4
26	88968.5	91429.6	107217	32752.4	38777.6	63787.2	55633.5	15161	55017.5	64423.4	115087	89005.8	189355	22631.4	32752.4	40088.7	78928.7	32830.7	15002.4	82204.3	20007.4	17232.8	6815.06	3722.21	7354.02	27010.3	18887	49000.9	133718	10000	10000	386.591	32425.8	69018.9	10000	59350.1	69000	6929.22	51032.8	44347	18967.9	81593.9	10010.2	7456.56	13608.4	38465.9	16405.6	26559.7	43884
27	89119.7	91948.4	107888	33210.8	38845.7	63932.5	55529.9	14975.5	55248.9	64597	116013	89006	190945	22732.6	33210.8	39900	79002.7	32939.5	14811	82712	20008.5	17134.2	6693.15	3673.2	7256.51	26910.6	18652.6	49001	134822	10000	10000	399.123	32326.4	69019.7	10000	59748.2	69000	6851.45	51072.6	44706	18966.3	82038.9	10010.6	7359.13	13401.6	38445.2	16305.6	26619.5	43687.6
28	89270.9	92467	108564	33669.2	38913.7	64077.8	55426.3	14790	55480.4	64770.5	116939	89006.3	192535	22833.8	33669.2	39711.4	79076.8	33048.4	14619.6	83219.7	20009.5	17035.6	6571.3	3624.21	7159.04	26811	18418.3	49001	135926	10000	10000	408.415	32226.9	69020.5	10000	60146.4	69000	6773.7	51112.3	45065	18964.7	82483.8	10011	7261.73	13194.8	38424.5	16205.7	26679.3	43491.2
29	89422.2	92985.4	109242	34127.5	38981.8	64223.1	55322.5	14604.6	55711.8	64944	117865	89006.5	194125	22935	34127.5	39522.7	79150.8	33157.2	14428.3	83727.5	20010.5	16937.1	6449.52	3575.24	7061.6	26711.3	18184.1	49001	137030	10000	10000	415.359	32127.4	69021.3	10000	60544.5	69000	6695.99	51152	45424.1	18963	82928.6	10011.4	7164.38	12988.1	38403.8	16105.6	26739.1	43294.9
30	89573.6	93503.7	109923	34585.8	39049.7	64368.3	55218.6	14419.2	55943.2	65117.5	118792	89006.8	195715	23036.2	34585.8	39334.1	79224.8	33266.1	14237.1	84235.2	20011.5	16838.5	6327.79	3526.27	6964.2	26611.7	17950	49001.1	138134	10000	10000	420.574	32027.9	69022.1	10000	60942.7	69000	6618.3	51191.7	45783.1	18961.2	83373.3	10011.8	7067.05	12781.4	38383.2	16005.6	26798.9	43098.5
31	89724.9	94021.9	110606	35044	39117.7	64513.5	55114.6	14233.9	56174.6	65290.9	119718	89007	197305	23137.4	35044	39145.5	79298.8	33375	14045.9	84742.9	20012.4	16740	6206.14	3477.33	6866.84	26512	17715.9	49001.1	139237	10000	10000	424.503	31928.3	69022.9	10000	61340.8	69000	6540.64	51231.3	46142.2	18959.5	83818	10012.2	6969.77	12574.8	38362.4	15905.5	26858.6	42902.3
32	89876.3	94539.9	111291	35502	39185.6	64658.7	55010.6	14048.7	56406.1	65464.2	120644	89007.3	198895	23238.6	35502	38956.9	79372.8	33483.8	13854.8	85250.6	20013.3	16641.5	6084.55	3428.39	6769.52	26412.3	17481.9	49001.1	140341	10000	10000	427.467	31828.7	69023.7	10000	61739	69000	6463.01	51271	46501.3	18957.7	84262.5	10012.6	6872.53	12368.2	38341.7	15805.5	26918.4	42706
33	90027.7	95057.8	111978	35960.1	39253.5	64803.8	54906.4	13863.5	56637.5	65637.6	121570	89007.5	200485	23339.8	35960.1	38768.3	79446.8	33592.7	13663.8	85758.3	20014.1	16543	5963.03	3379.47	6672.25	26312.6	17248	49001.2	141445	10000	10000	429.704	31729	69024.5	10000	62137.1	69000	6385.41	51310.7	46860.4	18955.9	84706.9	10013	6775.33	12161.8	38321	15705.4	26978.1	42509.8
34	90179.1	95575.5	112666	36418	39321.4	64948.9	54802.1	13678.4	56868.9	65810.8	122496	89007.8	202075	23441	36418	38579.8	79520.7	33701.5	13472.9	86265.9	20014.9	16444.5	5841.58	3330.57	6575.02	26213	17014.1	49001.2	142549	10000	10000	431.39	31629.2	69025.4	10000	62535.3	69000	6307.83	51350.4	47219.5	18954	85151.3	10013.5	6678.17	11955.3	38300.3	15605.2	27037.8	42313.6
35	90330.5	96093	113356	36875.8	39389.2	65094	54697.6	13493.3	57100.4	65984.1	123422	89008	203665	23542.1	36875.8	38391.3	79594.7	33810.4	13282	86773.6	20015.6	16346.1	5720.22	3281.68	6477.83	26113.3	16780.4	49001.2	143652	10000	10000	432.656	31529.4	69026.2	10000	62933.4	69000	6230.29	51390.1	47578.6	18952	85595.5	10013.9	6581.05	11748.9	38279.5	15505.1	27097.5	42117.4
36	90482	96610.4	114047	37333.6	39457.1	65239	54593.1	13308.3	57331.8	66157.3	124348	89008.3	205255	23643.3	37333.6	38202.7	79668.6	33919.2	13091.2	87281.2	20016.3	16247.6	5598.93	3232.81	6380.69	26013.6	16546.7	49001.3	144756	10000	10000	433.602	31429.6	69027	10000	63331.6	69000	6152.79	51429.8	47937.7	18950.1	86039.6	10014.3	6483.97	11542.6	38258.8	15404.9	27157.2	41921.3
37	90633.5	97127.6	114740	37791.3	39524.8	65383.9	54488.5	13123.4	57563.2	66330.4	125274	89008.6	206845	23744.5	37791.3	38014.2	79742.6	34028.1	12900.6	87788.8	20017	16149.2	5477.72	3183.96	6283.6	25913.9	16313.1	49001.3	145859	10000	10000	434.303	31329.7	69027.8	10000	63729.8	69000	6075.31	51469.5	48296.9	18948.1	86483.6	10014.7	6386.95	11336.4	38238	15304.7	27216.8	41725.2
38	90785	97644.7	115433	38248.9	39592.6	65528.9	54383.7	12938.6	57794.6	66503.5	126199	89008.8	208435	23845.7	38248.9	37825.8	79816.5	34136.9	12710	88296.4	20017.6	16050.8	5356.61	3135.12	6186.55	25814.2	16079.6	49001.3	146963	10000	10000	434.816	31229.7	69028.7	10000	64128	69000	5997.87	51509.2	48656	18946	86927.5	10015.1	6289.97	11130.2	38217.2	15204.5	27276.4	41529.2
39	90936.6	98161.5	116127	38706.4	39660.3	65673.7	54278.7	12753.8	58026	66676.5	127125	89009.1	210025	23946.9	38706.4	37637.3	79890.4	34245.8	12519.5	88804	20018.1	15952.4	5235.58	3086.3	6089.56	25714.5	15846.2	49001.4	148066	10000	10000	435.186	31129.7	69029.5	10000	64526.1	69000	5920.46	51548.9	49015.2	18943.9	87371.3	10015.5	6193.03	10924.2	38196.5	15104.2	27336	41333.1
40	91088.1	98678.2	116822	39163.8	39727.9	65818.6	54173.7	12569.1	58257.5	66849.4	128051	89009.3	211615	24048.1	39163.8	37448.9	79964.3	34354.6	12329.1	89311.6	20018.6	15854	5114.65	3037.5	5992.62	25614.8	15612.9	49001.4	149169	10000	10000	435.444	31029.6	69030.4	10000	64924.3	69000	5843.09	51588.5	49374.4	18941.8	87814.9	10015.9	6096.15	10718.1	38175.7	15003.9	27395.6	41137.1
41	91239.7	99194.6	117518	39621.1	39795.6	65963.4	54068.5	12384.4	58488.9	67022.4	128977	89009.6	213204	24149.2	39621.1	37260.5	80038.2	34463.5	12138.8	89819.2	20019.1	15755.6	4993.83	2988.71	5895.73	25515.1	15379.7	49001.4	150272	10000	10000	435.617	30929.4	69031.2	10000	65322.5	69000	5765.75	51628.2	49733.5	18939.6	88258.5	10016.3	5999.32	10512.2	38154.9	14903.6	27455.2	40941.1
42	91391.3	99710.9	118214	40078.4	39863.2	66108.1	53963.2	12199.8	58720.3	67195.2	129903	89009.9	214794	24250.4	40078.4	37072.1	80112	34572.3	11948.6	90326.7	20019.5	15657.2	4873.1	2939.95	5798.89	25415.4	15146.5	49001.4	151375	10000	10000	435.724	30829.1	69032.1	10000	65720.7	69000	5688.45	51667.9	50092.7	18937.3	88701.8	10016.7	5902.54	10306.3	38134	14803.2	27514.7	40745.2
43	91542.9	100227	118912	40535.5	39930.7	66252.8	53857.7	12015.4	58951.7	67368	130828	89010.2	216384	24351.6	40535.5	36883.7	80185.9	34681.1	11758.5	90834.2	20019.8	15558.9	4752.49	2891.21	5702.12	25315.7	14913.5	49001.5	152478	10000	10000	435.779	30728.8	69033	10000	66118.9	69000	5611.19	51707.6	50451.9	18935	89145.1	10017.2	5805.81	10100.6	38113.2	14702.8	27574.3	40549.3
44	91694.6	100743	119610	40992.5	39998.3	66397.4	53752.1	11830.9	59183.2	67540.7	131754	89010.4	217974	24452.8	40992.5	36695.3	80259.8	34790	11568.5	91341.7	20020.1	15460.6	4631.99	2842.49	5605.4	25215.9	14680.6	49001.5	153581	10000	10000	435.794	30628.4	69033.8	10000	66517.1	69000	5533.96	51747.3	50811.1	18932.6	89588.2	10017.6	5709.14	9894.89	38092.4	14602.4	27633.8	40353.4
45	91846.2	101258	120308	41449.4	40065.7	66542	53646.3	11646.6	59414.6	67713.4	132680	89010.7	219563	24554	41449.4	36507	80333.6	34898.8	11378.6	91849.2	20020.3	15362.3	4511.62	2793.79	5508.74	25116.2	14447.8	49001.5	154684	10000	10000	435.777	30527.9	69034.7	10000	66915.3	69000	5456.78	51786.9	51170.3	18930.2	90031.1	10018	5612.53	9689.3	38071.5	14501.9	27693.2	40157.6
46	91997.9	101774	121007	41906.3	40133.2	66686.5	53540.3	11462.4	59646	67885.9	133605	89011	221153	24655.1	41906.3	36318.7	80407.4	35007.7	11188.8	92356.6	20020.5	15264	4391.37	2745.11	5412.14	25016.5	14215.1	49001.6	155787	10000	10000	435.735	30427.3	69035.6	10000	67313.5	69000	5379.64	51826.6	51529.6	18927.7	90473.9	10018.4	5515.98	9483.81	38050.7	14401.4	27752.7	39961.8
47	92149.6	102289	121707	42363	40200.6	66831	53434.2	11278.2	59877.4	68058.4	134531	89011.3	222742	24756.3	42363	36130.4	80481.3	35116.5	10999.2	92864.1	20020.6	15165.7	4271.26	2696.45	5315.61	24916.7	13982.5	49001.6	156889	10000	10000	435.673	30326.6	69036.5	10000	67711.7	69000	5302.54	51866.3	51888.8	18925.2	90916.6	10018.8	5419.49	9278.41	38029.8	14300.8	27812.1	39766
48	92301.3	102804	122407	42819.6	40267.9	66975.4	53327.9	11094.2	60108.8	68230.9	135456	89011.5	224332	24857.5	42819.6	35942.1	80555.1	35225.4	10809.7	93371.5	20020.7	15067.4	4151.3	2647.82	5219.14	24817	13750	49001.6	157992	10000	10000	435.595	30225.8	69037.3	10000	68109.9	69000	5225.48	51906	52248	18922.6	91359	10019.2	5323.06	9073.12	38008.9	14200.2	27871.5	39570.3
49	92453.1	103319	123108	43276.1	40335.3	67119.8	53221.4	10910.2	60340.2	68403.2	136382	89011.8	225921	24958.7	43276.1	35753.9	80628.9	35334.2	10620.3	93878.9	20020.7	14969.2	4031.48	2599.21	5122.74	24717.2	13517.7	49001.7	159094	10000	10000	435.503	30124.9	69038.2	10000	68508.1	69000	5148.47	51945.6	52607.3	18919.9	91801.3	10019.7	5226.7	8867.94	37988	14099.6	27930.9	39374.6
50	92604.8	0	123809	43732.4	40402.5	67264.1	53114.7	10726.3	30000	68575.5	137307	89012.1	227511	25059.8	43732.4	35565.6	80702.6	20000	10431	94386.2	20020.6	14871	3911.83	2550.63	5026.42	24617.4	13285.5	50000	160197	10000	10000	435.401	30023.8	69039.1	10000	68906.3	69000	5071.5	51985.3	52966.5	18917.2	92243.4	10020.1	5130.41	8662.88	37967.1	13998.9	27990.2	39178.9
51	92756.6	1017.16	124510	44188.7	40469.6	67144.9	53007.9	10542.5	30231.6	68747.7	138232	89012.4	229100	25161	44188.7	35377.4	80776.4	20109	10241.9	94893.6	20020.5	14772.8	3792.34	2502.07	4930.03	24517.7	13053.4	50000	161299	10000	10000	435.288	29922.7	69040	10000	69304.6	69000	4994.5	52025	53325.8	18914.4	92685.3	10020.5	5034.19	8457.84	37946.2	13898.1	28049.5	38983.3
52	92908.3	1799.74	125212	44644.8	40536.7	67134.9	52900.8	10358.8	30463.2	68919.8	139157	89012.7	230690	25262.2	44644.8	35189.2	80850.2	20218.1	10052.9	95400.9	20020.3	14674.6	3673.04	2453.55	4833.71	24417.9	12821.4	50000	162401	10000	10000	435.168	29821.4	69040.9	10000	69702.8	69000	4917.54	52064.6	53685.1	18911.5	93127	10020.9	4938.04	8252.93	37925.2	13797.3	28108.8	38787.6
53	93060.1	2507.91	125915	45100.8	40603.8	67160.6	52793.5	10175.3	30694.7	69091.7	140083	89012.9	232279	25363.4	45100.8	35001.1	80923.9	20327.1	9864.02	95908.1	20020.1	14576.4	3553.93	2405.05	4737.48	24318.1	12589.6	49999.9	163502	10000	10000	435.039	29720	69041.8	10000	70101	69000	4840.64	52104.3	54044.4	18908.5	93568.5	10021.3	4841.97	8048.15	37904.3	13696.5	28168	38592.1
54	93211.9	3176.3	126617	45556.6	40670.7	67206	52686	9991.8	30926.3	69263.6	141008	89013.2	233868	25464.5	45556.6	34812.9	80997.6	20436.1	9675.32	96415.4	20019.7	14478.3	3435.03	2356.57	4641.34	24218.3	12357.9	49999.9	164604	10000	10000	434.904	29618.5	69042.7	10000	70499.2	69000	4763.79	52143.9	54403.6	18905.5	94009.8	10021.7	4745.97	7843.51	37883.3	13595.6	28227.2	38396.5
55	93363.7	3819.26	127321	46012.3	40737.7	67264.3	52578.3	9808.44	31157.9	69435.4	141933	89013.5	235458	25565.7	46012.3	34624.8	81071.4	20545.1	9486.77	96922.6	20019.4	14380.1	3316.35	2308.13	4545.28	24118.5	12126.4	49999.9	165706	10000	10000	434.762	29516.8	69043.6	10000	70897.4	69000	4686.99	52183.6	54762.9	18902.4	94450.8	10022.2	4650.06	7639.02	37862.4	13494.6	28286.3	38201
56	93515.6	4444.29	128024	46467.9	40804.5	67331.9	52470.4	9625.2	31389.5	69607.1	142858	89013.8	237047	25666.9	46467.9	34436.7	81145.1	20654.2	9298.39	97429.8	20018.9	14282	3197.9	2259.73	4449.31	24018.7	11895	49999.9	166807	10000	10000	434.614	29414.9	69044.6	10000	71295.7	69000	4610.25	52223.3	55122.2	18899.2	94891.6	10022.6	4554.24	7434.68	37841.4	13393.5	28345.5	38005.5
57	93667.4	5055.91	128728	46923.3	40871.4	67406.5	52362.1	9442.08	31621	69778.6	143783	89014.1	238636	25768	46923.3	34248.6	81218.8	20763.2	9110.17	97936.9	20018.4	14183.9	3079.71	2211.35	4353.44	23918.9	11663.8	49999.9	167908	10000	10000	434.46	29312.9	69045.5	10000	71693.9	69000	4533.57	52262.9	55481.5	18895.9	95332.2	10023	4458.5	7230.5	37820.4	13292.4	28404.6	37810.1
58	93819.3	5657.03	129432	47378.5	40938.1	67486.7	52253.7	9259.08	31852.6	69950.1	144708	89014.4	240225	25869.2	47378.5	34060.6	81292.5	20872.2	8922.13	98444	20017.8	14085.9	2961.79	2163.01	4257.66	23819.1	11432.7	49999.8	169009	10000	10000	434.3	29210.7	69046.4	10000	72092.1	69000	4456.94	52302.6	55840.9	18892.5	95772.5	10023.4	4362.86	7026.49	37799.4	13191.3	28463.6	37614.7
59	93971.1	6249.67	130136	47833.5	41004.8	67571.5	52145	9076.2	32084.1	70121.4	145633	89014.7	241814	25970.4	47833.5	33872.5	81366.1	20981.2	8734.27	98951	20017.1	13987.8	2844.16	2114.71	4161.99	23719.3	11201.8	49999.8	170110	10000	10000	434.134	29108.3	69047.3	10000	72490.3	69000	4380.38	52342.2	56200.2	18889	96212.5	10023.9	4267.32	6822.65	37778.4	13090	28522.6	37419.3
60	94123	6835.29	130841	48288.4	41071.5	67660	52035.9	8893.46	32315.7	70292.5	146557	89015	243404	26071.5	48288.4	33684.5	81439.8	21090.2	8546.6	99458.1	20016.4	13889.8	2726.85	2066.44	4066.43	23619.4	10971.1	49999.8	171210	10000	10000	433.962	29005.7	69048.3	10000	72888.5	69000	4303.88	52381.9	56559.5	18885.5	96652.2	10024.3	4171.87	6619.01	37757.4	12988.7	28581.5	37224
61	94274.9	7414.98	131546	48743.1	41138	67751.9	51926.6	8710.85	32547.3	70463.6	147482	89015.3	244993	26172.7	48743.1	33496.6	81513.4	21199.2	8359.13	99965	20015.6	13791.8	2609.89	2018.21	3970.98	23519.6	10740.5	49999.8	172311	10000	10000	433.783	28902.8	69049.2	10000	73286.8	69000	4227.45	52421.5	56918.8	18881.8	97091.5	10024.7	4076.53	6415.57	37736.3	12887.3	28640.4	37028.7
62	94426.8	7989.57	132251	49197.6	41204.5	67846.5	51817	8528.39	32778.8	70634.4	148407	89015.6	246582	26273.9	49197.6	33308.6	81587.1	21308.3	8171.86	100472	20014.7	13693.8	2493.3	1970.02	3875.65	23419.8	10510.2	49999.7	173411	10000	10000	433.597	28799.8	69050.2	10000	73685	69000	4151.08	52461.2	57278.2	18878	97530.6	10025.1	3981.3	6212.34	37715.3	12785.7	28699.3	36833.4
63	94578.7	8559.71	132957	49651.9	41271	67943.5	51707.1	8346.07	33010.4	70805.1	149331	89015.9	248171	26375	49651.9	33120.7	81660.7	21417.3	7984.8	100979	20013.7	13595.8	2377.12	1921.88	3780.44	23319.9	10280	49999.7	174510	10000	10000	433.405	28696.4	69051.1	10000	74083.2	69000	4074.78	52500.8	57637.5	18874.1	97969.3	10025.5	3886.18	6009.34	37694.2	12684.1	28758.1	36638.2
64	94730.6	9125.93	133662	50105.9	41337.4	68042.7	51596.9	8163.9	33241.9	70975.7	150255	89016.2	249760	26476.2	50105.9	32932.8	81734.3	21526.3	7797.97	101486	20012.7	13497.9	2261.38	1873.78	3685.36	23220	10050.1	49999.7	175610	10000	10000	433.205	28592.8	69052.1	10000	74481.5	69000	3998.56	52540.5	57996.9	18870.1	98407.6	10026	3791.19	5806.58	37673.1	12582.5	28816.8	36443
65	94882.6	9688.65	134368	50559.7	41403.7	68143.7	51486.3	7981.89	33473.5	71146	151180	89016.5	251349	26577.3	50559.7	32744.9	81807.9	21635.3	7611.38	101992	20011.6	13400	2146.14	1825.73	3590.41	23120.2	9820.3	49999.7	176709	10000	10000	432.998	28488.8	69053	10000	74879.7	69000	3922.41	52580.1	58356.2	18865.9	98845.5	10026.4	3696.31	5604.08	37652	12480.6	28875.5	36247.8
66	95034.5	10248.2	135075	51013.3	41469.9	68246.5	51375.3	7800.04	33705	71316.1	152104	89016.8	252937	26678.5	51013.3	32557	81881.5	21744.3	7425.03	102499	20010.3	13302.1	2031.44	1777.72	3495.61	23020.3	9590.78	49999.6	177808	10000	10000	432.783	28384.6	69054	10000	75278	69000	3846.33	52619.8	58715.6	18861.6	99283	10026.8	3601.58	5401.86	37630.9	12378.7	28934.1	36052.7
67	95186.5	10804.9	135781	51466.6	41536	68350.7	51264	7618.36	33936.6	71486.1	153028	89017.1	254526	26779.7	51466.6	32369.2	81955.1	21853.3	7238.94	103006	20009	13204.2	1917.34	1729.77	3400.95	22920.4	9361.48	49999.6	178906	10000	10000	432.56	28279.9	69054.9	10000	75676.2	69000	3770.34	52659.4	59075	18857.2	99720	10027.2	3506.98	5199.93	37609.8	12276.7	28992.6	35857.6
68	95338.4	11359	136488	51919.6	41602.1	68456.3	51152.2	7436.85	34168.1	71655.8	153952	89017.4	256115	26880.8	51919.6	32181.4	82028.6	21962.3	7053.11	103512	20007.7	13106.3	1803.92	1681.87	3306.45	22820.5	9132.41	49999.6	180004	10000	10000	432.328	28174.9	69055.9	10000	76074.4	69000.1	3694.43	52699	59434.3	18852.7	100157	10027.7	3412.52	4998.32	37588.7	12174.5	29051.1	35662.6
69	95490.4	11910.6	137195	52372.3	41668	68563.1	51040	7255.52	34399.7	71825.2	154875	89017.7	257704	26982	52372.3	31993.6	82102.2	22071.3	6867.57	104019	20006.2	13008.5	1691.24	1634.03	3212.12	22720.6	8903.6	49999.6	181101	10000	10000	432.086	28069.4	69056.9	10000	76472.7	69000.1	3618.61	52738.7	59793.7	18847.9	100593	10028.1	3318.22	4797.05	37567.5	12072.3	29109.5	35467.6
70	95642.4	12460	137902	52824.7	41733.9	68671.1	50927.4	7074.39	34631.2	71994.4	155799	89018	259292	27083.1	52824.7	31805.8	82175.7	22180.3	6682.33	104525	20004.6	12910.7	1579.4	1586.25	3117.95	22620.6	8675.04	49999.6	182199	10000	10000	431.835	27963.4	69057.9	10000	76870.9	69000.1	3542.88	52778.3	60153.1	18843.1	101028	10028.5	3224.08	4596.15	37546.3	11969.8	29167.8	35272.6
71	95794.4	13007.3	138609	53276.8	41799.7	68780	50814.3	6893.45	34862.7	72163.3	156723	89018.3	260881	27184.3	53276.8	31618.1	82249.2	22289.2	6497.4	105031	20002.9	12812.9	1468.52	1538.54	3023.98	22520.7	8446.75	49999.5	183295	10000	10000	431.573	27857	69058.8	10000	77269.2	69000.1	3467.24	52817.9	60512.5	18838	101463	10029	3130.12	4395.66	37525.2	11867.3	29226	35077.7
72	95946.4	13552.6	139316	53728.4	41865.4	68889.8	50700.7	6712.71	35094.3	72331.9	157646	89018.7	262470	27285.5	53728.4	31430.4	82322.7	22398.2	6312.8	105538	20001.2	12715.1	1358.72	1490.89	2930.19	22420.8	8218.74	49999.5	184391	10000	10000	431.3	27749.9	69059.8	10000	77667.4	69000.1	3391.7	52857.6	60871.9	18832.8	101897	10029.4	3036.33	4195.6	37504	11764.5	29284.1	34882.9
73	96098.4	14096	140024	54179.7	41931	69000.4	50586.6	6532.18	35325.8	72500.1	158569	89019	264058	27386.6	54179.7	31242.7	82396.2	22507.2	6128.55	106044	19999.3	12617.4	1250.17	1443.31	2836.62	22320.8	7991.02	49999.5	185486	10000	10000	431.015	27642.1	69060.8	10000	78065.7	69000.1	3316.27	52897.2	61231.3	18827.4	102330	10029.8	2942.73	3996.02	37482.8	11661.6	29342.1	34688
74	96250.4	14637.5	140732	54630.6	41996.5	69111.8	50471.9	6351.87	35557.3	72668	159492	89019.3	265647	27487.8	54630.6	31055.1	82469.7	22616.2	5944.67	106550	19997.4	12519.7	1143.07	1395.81	2743.26	22220.8	7763.6	49999.5	186581	10000	10000	430.718	27533.6	69061.8	10000	78464	69000.1	3240.93	52936.8	61590.7	18821.8	102763	10030.2	2849.34	3796.97	37461.6	11558.5	29399.9	34493.2
75	96402.4	15177.3	141440	55080.9	42061.9	69223.9	50356.6	6171.79	35788.9	72835.4	160415	89019.6	267235	27588.9	55080.9	30867.4	82543.1	22725.2	5761.18	107056	19995.3	12422	1037.64	1348.39	2650.13	22120.9	7536.51	49999.4	187674	10000	10000	430.407	27424.2	69062.8	10000	78862.2	69000.1	3165.71	52976.5	61950.1	18815.9	103195	10030.7	2756.16	3598.49	37440.3	11455.2	29457.7	34298.5
76	96554.4	15715.4	142148	55530.8	42127.1	69336.5	50240.7	5991.94	36020.4	73002.4	161337	89019.9	268824	27690.1	55530.8	30679.9	82616.6	22834.2	5578.1	107561	19993.1	12324.3	934.188	1301.05	2557.25	22020.9	7309.75	49999.4	188767	10000	10000	430.081	27313.9	69063.8	10000	79260.5	69000.1	3090.61	53016.1	62309.5	18809.9	103626	10031.1	2663.21	3400.64	37419.1	11351.7	29515.3	34103.8
77	96706.4	16251.9	142857	55980	42192.3	69449.7	50124.1	5812.34	36251.9	73168.9	162259	89020.2	270412	27791.2	55980	30492.3	82690	22943.1	5395.46	108067	19990.8	12226.7	833.081	1253.81	2464.64	21920.9	7083.33	49999.4	189858	10000	10000	429.741	27202.4	69064.8	10000	79658.8	69000.1	3015.63	53055.7	62668.9	18803.6	104056	10031.5	2570.5	3203.51	37397.8	11248	29572.8	33909.1
78	96858.5	16786.6	143565	56428.7	42257.3	69563.3	50006.8	5632.99	36483.4	73334.8	163181	89020.6	272000	27892.4	56428.7	30304.7	82763.4	23052.1	5213.29	108572	19988.4	12129.1	734.788	1206.66	2372.31	21820.9	6857.28	49999.4	190949	10000	10000	429.383	27089.6	69065.8	10000	80057	69000.1	2940.77	53095.3	63028.4	18797	104484	10032	2478.05	3007.16	37376.5	11144	29630.1	33714.5
79	97010.5	17319.8	144274	56876.7	42322.2	69677.4	49888.7	5453.9	36715	73500.1	164103	89020.9	273589	27993.5	56876.7	30117.2	82836.8	23161.1	5031.61	109078	19985.9	12031.5	639.901	1159.62	2280.28	21720.9	6631.6	49999.3	192037	10000	10000	429.008	26975.3	69066.8	10000	80455.3	69000.1	2866.04	53135	63387.8	18790.2	104911	10032.4	2385.89	2811.7	37355.2	11039.8	29687.2	33519.9
80	97162.6	17851.3	144983	57323.8	42386.9	69791.9	49769.9	5275.07	36946.5	73664.6	165025	89021.2	275177	28094.7	57323.8	29929.8	82910.2	23270.1	4850.47	109583	19983.3	11934	549.181	1112.69	2188.58	21620.8	6406.32	49999.3	193124	10000	10000	428.613	26859.1	69067.8	10000	80853.6	69000.1	2791.46	53174.6	63747.2	18783	105337	10032.8	2294.02	2617.24	37333.9	10935.2	29744.1	33325.4
81	97314.6	18381.2	145691	57770.2	42451.5	69906.6	49650.1	5096.52	37178	73828.3	165946	89021.5	276765	28195.8	57770.2	29742.3	82983.6	23379	4669.89	110088	19980.6	11836.4	463.593	1065.87	2097.22	21520.8	6181.45	49999.3	194209	10000	10000	428.198	26740.7	69068.8	10000	81251.9	69000.1	2717.02	53214.2	64106.7	18775.6	105761	10033.2	2202.47	2423.92	37312.6	10830.4	29800.8	33130.9
82	97466.7	18909.4	146401	58215.5	42516	70021.6	49529.4	4918.25	37409.5	73991.1	166866	89021.8	278353	28297	58215.5	29554.9	83056.9	23488	4489.93	110592	19977.7	11738.9	384.349	1019.19	2006.25	21420.7	5957	49999.3	195291	10000	10000	427.76	26619.5	69069.9	10000	81650.1	69000.1	2642.74	53253.8	64466.1	18767.8	106184	10033.7	2111.26	2231.92	37291.3	10725.2	29857.3	32936.4
83	97618.8	19435.8	147110	58659.7	42580.2	70136.8	49407.7	4740.25	37641	74152.7	167786	89022.2	279942	28398.1	58659.7	29367.5	83130.3	23597	4310.62	111097	19974.7	11641.5	312.904	972.643	1915.69	21320.6	5732.99	49999.2	196370	10000	10000	427.298	26494.7	69070.9	10000.1	82048.4	69000.1	2568.61	53293.4	64825.6	18759.6	106604	10034.1	2020.43	2041.44	37269.9	10619.7	29913.4	32742.1
84	97770.8	19960.4	147819	59102.7	42644.4	70252.1	49284.9	4562.53	37872.5	74313.1	168706	89022.5	281530	28499.3	59102.7	29180.1	83203.6	23705.9	4132.01	111600	19971.5	11544	250.863	926.248	1825.58	21220.5	5509.43	49999.2	197444	10000	10000	426.81	26365.4	69071.9	10000.1	82446.7	69000.1	2494.66	53333.1	65185	18751	107021	10034.5	1930.01	1852.75	37248.5	10513.7	29969.2	32547.7
85	97922.9	20483.1	148529	59544.1	42708.3	70367.5	49160.9	4385.08	38104.1	74471.8	169625	89022.8	283118	28600.4	59544.1	28992.8	83276.9	23814.9	3954.16	112104	19968.3	11446.6	199.683	880.015	1735.95	21120.4	5286.33	49999.2	198512	10000	10000	426.293	26229.9	69073	10000.1	82845	69000.1	2420.89	53372.7	65544.5	18742	107436	10035	1840.02	1666.16	37227.1	10407.3	30024.7	32353.4
86	98075	21003.8	149238	59983.9	42772.1	70482.9	49035.6	4207.88	38335.6	74628.7	170544	89023.2	284706	28701.6	59983.9	28805.5	83350.2	23923.9	3777.14	112607	19964.9	11349.3	160.163	833.96	1646.85	21020.3	5063.69	49999.1	199573	10000	10000	425.744	26085.6	69074	10000.1	83243.3	69000.1	2347.31	53412.3	65903.9	18732.5	107847	10035.4	1750.51	1482.12	37205.7	10300.4	30079.6	32159.1
87	98227.1	21522.2	149948	60421.5	42835.6	70598.2	48909	4030.9	38567.1	74783.2	171461	89023.5	286294	28802.7	60421.5	28618.3	83423.5	24032.8	3601.01	113110	19961.3	11251.9	131.874	788.098	1558.34	20920.2	4841.5	49999.1	200622	10000	10000	425.161	25928.2	69075	10000.1	83641.6	69000.1	2273.92	53451.9	66263.4	18722.5	108253	10035.8	1661.52	1301.18	37184.3	10193	30134.1	31964.9
88	98379.2	22038.1	150658	60856.6	42898.9	70713.4	48780.8	3854.09	38798.6	74934.7	172378	89023.8	287881	28903.9	60856.6	28431	83496.8	24141.8	3425.86	113612	19957.6	11154.6	113.064	742.446	1470.46	20820.1	4619.75	49999.1	201651	10000	10000	424.541	25749.4	69076.1	10000.1	84039.9	69000.1	2200.76	53491.5	66622.9	18711.9	108654	10036.3	1573.1	1124.09	37162.9	10085	30187.9	31770.8
89	98531.3	22551.3	151368	61288.7	42962	70828.5	48650.9	3677.36	39030.1	75082.3	173294	89024.2	289469	29005	61288.7	28243.8	83570	24250.7	3251.77	114113	19953.7	11057.3	101.216	697.025	1383.3	20719.9	4398.38	49999.1	202649	10000	10000	423.879	25532.4	69077.1	10000.1	84438.2	69000.1	2127.82	53531.1	66982.3	18700.7	109049	10036.7	1485.32	951.888	37141.4	9976.32	30240.9	31576.7
90	98683.4	23061.3	152078	61716.8	43024.9	70943.2	48519.1	3500.57	39261.6	75224.5	174208	89024.5	291057	29106.2	61716.8	28056.7	83643.3	24359.7	3078.85	114613	19949.7	10960.1	93.87	651.859	1296.93	20619.7	4177.31	49999	203585	10000	10000	423.172	25243.3	69078.2	10000.1	84836.5	69000.1	2055.11	53570.7	67341.8	18688.8	109434	10037.1	1398.23	786.009	37120	9866.9	30293	31382.6
91	98835.5	23567.6	152788	62139.7	43087.5	71057.6	48385.3	3323.48	39493.1	75359.2	175121	89024.8	292645	29207.3	62139.7	27869.5	83716.5	24468.7	2907.21	115112	19945.5	10862.9	89.1101	606.972	1211.44	20519.5	3956.38	49999	204418	10000	10000	422.414	24846.2	69079.2	10000.1	85234.8	69000.1	1982.67	53610.3	67701.3	18676.1	109807	10037.6	1311.91	628.534	37098.5	9756.64	30343.7	31188.6
92	98987.6	24069.4	153499	62555.7	43149.9	71171.5	48249.3	3145.68	39724.6	75482.3	176032	89025.2	294232	29308.5	62555.7	27682.4	83789.7	24577.6	2736.99	115609	19941.2	10765.7	85.6182	562.393	1126.95	20419.3	3735.33	49999	205156	10000	10000	421.6	24374.8	69080.3	10000.1	85633.1	69000.1	1910.5	53649.9	68060.8	18662.6	110163	10038	1226.46	482.483	37077	9645.44	30392.8	30994.6
93	99139.7	24565.6	154209	62961.6	43211.9	71284.8	48110.7	2966.38	39956.1	75586.4	176940	89025.5	295820	29409.6	62961.6	27495.4	83862.9	24686.6	2568.35	116104	19936.7	10668.5	82.5018	518.154	1043.56	20319.1	3513.64	49998.9	205860	10000	10000	420.723	23883.6	69081.4	10000.1	86031.4	69000.1	1838.62	53689.5	68420.2	18648.1	110493	10038.4	1141.98	352.205	37055.4	9533.18	30439.5	30800.7
94	99291.8	25054.3	154920	63352	43273.7	71397.3	47969.3	2784.03	40187.6	75656	177845	89025.8	297408	29510.7	63352	27308.3	83936	24795.5	2401.46	116596	19932	10571.4	79.0652	474.29	961.451	20218.8	3290.38	49998.9	206559	10000	10000	419.775	23389.3	69082.4	10000.1	86429.7	69000.1	1767.06	53729.1	68779.7	18632.5	110779	10038.9	1058.59	243.491	37033.9	9419.7	30482.6	30606.9
95	99443.9	25532.9	155630	63715.6	43335.1	71509	47824.7	2594.9	40419.1	75661	178745	89026.2	298995	29611.9	63715.6	27121.3	84009.2	24904.5	2236.54	117081	19927.1	10474.3	74.5564	430.836	880.787	20118.6	3063.54	49998.9	207256	10000	10000	418.748	22894.7	69083.5	10000.1	86828	69000.1	1695.83	53768.7	69139.2	18615.7	110987	10039.3	976.43	162.321	37012.3	9304.83	30520	30413.1
96	99596	25996.2	156341	64023.2	43396.1	71619.5	47676.5	2387.54	40650.6	75577.9	179638	89026.5	300583	29713	64023.2	26934.4	84082.3	25013.4	2073.82	117555	19922	10377.3	67.7981	387.826	801.786	20018.3	2828.21	49998.9	207954	10000	10000	417.631	22400.2	69084.6	10000.1	87226.3	69000.1	1624.96	53808.3	69498.7	18597.5	111049	10039.8	895.684	110.908	36990.8	9188.36	30546.2	30219.3
97	99748.1	26433.8	157052	64172.1	43456.8	71728.8	47524.2	2119.01	40882.1	75443.1	180519	89026.9	302170	29814.2	64172.1	26747.4	84155.4	25122.3	1913.62	118002	19916.7	10280.3	56.5359	345.284	724.711	19918	2568.72	49998.8	208652	10000	10000	416.412	21905.8	69085.7	10000.1	87624.7	69000.1	1554.48	53847.9	69858.2	18577.6	110908	10040.2	816.555	84.0021	36969.2	9070.02	30545	30025.6
98	99900.3	26819.8	157763	63909.1	43517	71836.5	47367.2	1769.63	41113.6	75296.2	181375	89027.2	303757	29915.3	63909.1	26560.6	84228.5	25231.3	1756.26	118363	19911.3	10183.3	37.5525	303.206	649.876	19817.7	2227.64	49998.8	209349	10000	10000	415.077	21411.5	69086.7	10000.1	88023	69000.1	1484.43	53887.5	70217.7	18555.9	110643	10040.6	739.293	72.0015	36947.6	8949.5	30457.5	29832
99	100052	27065.2	158474	63440.3	43576.8	71942.4	47204.8	1414.75	41345.1	75147.4	182172	89027.5	305345	30016.5	63440.3	26373.7	84301.6	25340.2	1602.17	118624	19905.6	10086.4	15.3897	261.518	577.664	19717.3	1795.5	49998.8	210047	10000	10000	413.606	20917.3	69087.8	10000.1	88421.3	69000.1	1414.83	53927.1	70577.2	18532	110349	10041.1	664.201	67.1431	36925.9	8826.43	30270.6	29638.4
100	100204	26921.5	159185	62961.4	43636	72046	47036.1	1070.51	41576.6	74998.4	182781	89027.9	306932	30117.6	62961.4	26186.9	84374.7	25449.2	1451.83	118874	19899.7	9989.53	3.80928	219.982	508.541	19617	1364.45	49998.7	210745	10000	10000	411.978	20423.3	69088.9	10000.1	88819.6	69000.1	1345.73	53966.7	70936.7	18505.6	110050	10041.5	591.647	65.265	36904.3	8700.34	30071.5	29444.9
[truncated: 59 more columns]

## Sheet: Flux
Reaction	Flux (extensive) (0.00166054*zmol/s)
Reaction_90	1191.96
Reaction_89	895.472
Reaction_100	893.121
Reaction_76	746.004
Reaction_102	697.195
Reaction_48	697.129
Reaction_85	696.833
Reaction_46	696.467
Reaction_86	696.467
Reaction_87	696.467
Reaction_51	695.823
Reaction_64	695.035
Reaction_84	596.311
Reaction_96	502.855
Reaction_16	497.925
Reaction_49	497.64
Reaction_12	497.497
Reaction_11	497.462
Reaction_13	497.462
Reaction_97	497.238
Reaction_56	496.644
Reaction_57	496.454
Reaction_6	495.812
Reaction_83	495.05
Reaction_44	468.776
Reaction_95	468.776
Reaction_98	458.827
Reaction_99	458.827
Reaction_50	457.894
Reaction_91	448.316
Reaction_63	445.82
Reaction_1	431.25
Reaction_92	417.91
Reaction_43	417.751
Reaction_32	407.678
Reaction_55	397.727
Reaction_10	397.315
Reaction_21	396.04
Reaction_35	396.04
Reaction_72	323.249
Reaction_54	318.302
Reaction_45	299.501
Reaction_47	299.501
Reaction_78	299.359
Reaction_59	299.094
Reaction_60	299.084
Reaction_58	298.789
Reaction_66	298.584
Reaction_5	297.744
Reaction_9	297.744
Reaction_42	297.65
Reaction_70	297.65
Reaction_81	258.397
Reaction_82	258.397
Reaction_73	254.351
Reaction_74	254.351
Reaction_37	227.385
Reaction_33	218.797
Reaction_93	199.711
Reaction_8	199.461
Reaction_88	199.203
Reaction_94	199.203
Reaction_19	198.953
Reaction_4	198.864
Reaction_15	198.02
Reaction_18	198.02
Reaction_40	198
Reaction_77	179.82
Reaction_79	179.82
Reaction_3	178.21
Reaction_7	178.21
Reaction_61	174.828
Reaction_52	149.75
Reaction_80	121.866
Reaction_34	109.698
Reaction_36	109.386
Reaction_22	101.863
Reaction_24	101.741
Reaction_20	101.738
Reaction_23	101.482
Reaction_25	101.482
Reaction_26	101.482
Reaction_27	101.482
Reaction_28	101.482
Reaction_29	101.482
Reaction_30	101.482
Reaction_31	101.482
Reaction_2	99.8981
Reaction_17	99.8981
Reaction_67	99.8981
Reaction_14	99.8811
Reaction_75	99.8336
Reaction_39	99.7506
Reaction_71	99.7506
Reaction_41	99.0099
Reaction_68	89.8652
Reaction_38	49.7512

## Sheet: Model Reduction
Sr. No.	Reaction number	Reaction	Reactants	Time	Sensitivity	Concentration	Flux (extensive) [mol/s]
1	Reaction_1	[BC].[Insulin Receptor] + [BC].Insulin -> [BC].IRS1	Insulin Receptor	100	0.862396	50000	431.25
			Insulin	100	0.624925	69000	431.25
2	Reaction_2	[BC].IRS1 -> [BC].SHP2 + [BC].GRB2	IRS1	100	0.000127081	41576.6	99.8981
			IRS1	100	0.000127081	41576.6	99.8981
3	Reaction_3	[BC].SHP2 -> [BC].PI3K	SHP2	100	0.121283	1345.73	178.21
4		[BC].PI3K -> [BC].PIP2	PI3K	100	0.0072509	15222.9	198.864
5		[BC].PIP2 -> [BC].PIP3	PIP2	100	0.0216576	9989.53	297.744
6		[BC].PIP3 -> [BC].AKT	PIP3	100	0.0404885	9973.35	495.812
7		[BC].GRB2 -> [BC].RAS	GRB2	100	0.12179	1345.73	178.21
8		[BC].RAS -> [BC].RAF	RAS	100	0.00121223	43636	199.461
9		[BC].RAF -> [BC].MEK	RAF	100	0.021893	10060.3	297.744
10		[BC].MEK -> [BC].[ERK1/2]	MEK	100	0.0134578	19617	397.315
11		[BC].AKT -> [BC].GLUT4	AKT	100	0.00516211	19899.7	497.462
12		[BC].GLUT4 -> [BC].GLUCOSE	GLUT4	100	0.00498483	49406.1	497.497
13		[BC].GLUCOSE + [BC].Hexokinase + [BC].[Aldose Reductase] -> [BC].[Glucose-6-Phosphate] + [BC].Hexokinase + [BC].Sorbitol + [BC].[Aldose Reductase]	GLUCOSE	100	0.00513948	49998.7	497.462
			GLUCOSE	0	0	49000	497.462
			GLUCOSE	100	0.00510601	49998.7	497.462
			GLUCOSE	0	0	49000	497.462
			Hexokinase	0	0	20000	497.462
			Hexokinase	0	0	20000	497.462
			Hexokinase	0	0	20000	497.462
			Hexokinase	0	0	20000	497.462
			Aldose Reductase	0	0	25000	497.462
			Aldose Reductase	0	0	25000	497.462
			Aldose Reductase	0	0	25000	497.462
			Aldose Reductase	0	0	25000	497.462
14		[Beta Cell].[Glucose-6-Phosphate] + [Beta Cell].[Phosphoglucose isomerase] -> [Beta Cell].[Fructose-6-Phosphate] + [Beta Cell].[Phosphoglucose isomerase]	Glucose-6-Phosphate	87.079	0.00012454	76588.6	99.8811
			Glucose-6-Phosphate	0	0	42000	99.8811
			Phosphoglucose isomerase	0	0	10000	99.8811
			Phosphoglucose isomerase	0	0	10000	99.8811
15		[Beta Cell].[Fructose-6-Phosphate] + [Beta Cell].Phosphofructokinase -> [Beta Cell].[Fructose 1,6-bisphosphate] + [Beta Cell].Phosphofructokinase	Fructose-6-Phosphate	100	0.275557	591.647	198.02
			Fructose-6-Phosphate	0	0	10000	198.02
			Phosphofructokinase	0	0	10000	198.02
			Phosphofructokinase	0	0	10000	198.02
16		[Beta Cell].[Fructose 1,6-bisphosphate] + [Beta Cell].[Fructose bisphosphate aldolase] -> [Beta Cell].[Gleceraldehyde 3-phosphate] + [Beta Cell].DHAP + [Beta Cell].[Fructose bisphosphate aldolase]	Fructose 1,6-bisphosphate	100	0.00277702	72046	497.925
			Fructose 1,6-bisphosphate	100	0.00274827	72046	497.925
			Fructose 1,6-bisphosphate	0	0	60000	497.925
			Fructose bisphosphate aldolase	0	0	10000	497.925
			Fructose bisphosphate aldolase	0	0	10000	497.925
			Fructose bisphosphate aldolase	0	0	10000	497.925
17		[Beta Cell].[Gleceraldehyde 3-phosphate] + [Beta Cell].[Glyceraldehyde 3-P dehydrogenase] -> [Beta Cell].[1, 3-bisphosphoglycerate] + [Beta Cell].[Glyceraldehyde 3-P dehydrogenase]	Gleceraldehyde 3-phosphate	86.9115	9.77379e-05	83641.6	99.8981
			Gleceraldehyde 3-phosphate	0	0	49000	99.8981
			Glyceraldehyde 3-P dehydrogenase	0	0	10000	99.8981
			Glyceraldehyde 3-P dehydrogenase	0	0	10000	99.8981
18		[Beta Cell].[1, 3-bisphosphoglycerate] + [Beta Cell].[Phosphoglycerate kinase] -> [Beta Cell].[3-Phosphoglycerate] + [Beta Cell].ATP + [Beta Cell].[Phosphoglycerate kinase]	1, 3-bisphosphoglycerate	100	0.274722	592.325	198.02
			1, 3-bisphosphoglycerate	100	0.274546	592.325	198.02
			1, 3-bisphosphoglycerate	0	0	10000	198.02
			Phosphoglycerate kinase	0	0	10000	198.02
			Phosphoglycerate kinase	0	0	10000	198.02
			Phosphoglycerate kinase	0	0	10000	198.02
19		[Beta Cell].[3-Phosphoglycerate] + [Beta Cell].[Phosphoglycerate mutase] -> [Beta Cell].[Phosphoglycerate mutase] + [Beta Cell].[2-Phosphoglycerate]	3-Phosphoglycerate	100	0.00554557	18505.6	198.953
			3-Phosphoglycerate	0	0	19000	198.953
			Phosphoglycerate mutase	0	0	10000	198.953
			Phosphoglycerate mutase	0	0	10000	198.953
20		[Beta Cell].[2-Phosphoglycerate] + [Beta Cell].Enolase -> [Beta Cell].Phosphoenolpyruvate + [Beta Cell].Enolase	2-Phosphoglycerate	92.0076	0.000751416	28739.1	101.738
			2-Phosphoglycerate	0	0	19800	101.738
			Enolase	0	0	10000	101.738
			Enolase	0	0	10000	101.738
21		[Beta Cell].Phosphoenolpyruvate + [Beta Cell].[Pyruvate kinase] -> [Beta Cell].PYRUVATE + [Beta Cell].[Pyruvate kinase] + [Beta Cell].ATP	Phosphoenolpyruvate	100	0.23138	1451.83	396.04
			Phosphoenolpyruvate	100	0.231008	1451.83	396.04
			Phosphoenolpyruvate	0	0	20000	396.04
			Pyruvate kinase	0	0	10000	396.04
			Pyruvate kinase	0	0	10000	396.04
			Pyruvate kinase	0	0	10000	396.04
22		[Beta Cell].PYRUVATE + [Beta Cell].[Pyruvate dehydrogenase] -> Mitochondria.[Acetyl CoA] + [Beta Cell].[Pyruvate dehydrogenase]	PYRUVATE	100	0.000203748	66685.2	101.863
			PYRUVATE	0	0	38000	101.863
			Pyruvate dehydrogenase	0	0	10000	101.863
			Pyruvate dehydrogenase	0	0	10000	101.863
23		Mitochondria.[Acetyl CoA] + Mitochondria.[Citrate Synthase] -> Mitochondria.Citrate + Mitochondria.[Citrate Synthase]	Acetyl CoA	100	0.00511329	10041.5	101.482
			Acetyl CoA	0	0	10000	101.482
			Citrate Synthase	0	0	10000	101.482
			Citrate Synthase	0	0	10000	101.482
24		Mitochondria.Citrate + Mitochondria.Aconitase -> Mitochondria.[D-Isocitrate] + Mitochondria.Aconitase	Citrate	100	0.000865669	30117.6	101.741
			Citrate	0	0	20000	101.741
			Aconitase	0	0	10000	101.741
			Aconitase	0	0	10000	101.741
25		Mt.Isocitratedehydrogenase + Mt.[D-Isocitrate] -> Mt.[α ketoglutarate] + Mt.Isocitratedehydrogenase	Isocitratedehydrogenase	0	0	10000	101.482
			Isocitratedehydrogenase	0	0	10000	101.482
			D-Isocitrate	100	0.00510765	10030.7	101.482
			D-Isocitrate	0	0	10000	101.482
26		Mt.[α KG dehydrogenase] + Mt.[α ketoglutarate] -> Mt.[Succinyl CoA] + Mt.[α KG dehydrogenase] + [BC].[Secretory Granules]	α KG dehydrogenase	0	0	10000	101.482
			α KG dehydrogenase	0	0	10000	101.482
			α KG dehydrogenase	0	0	10000	101.482
			α ketoglutarate	100	0.00512266	10000.1	101.482
			α ketoglutarate	0	0	10000	101.482
			α ketoglutarate	100	0.0051291	10000.1	101.482
27		Mt.[Succinyl CoA] + Mt.[Succinyl CoA synthase] -> Mt.Succinate + Mt.[Succinyl CoA synthase]	Succinyl CoA	100	0.00512268	10000	101.482
			Succinyl CoA	0	0	10000	101.482
			Succinyl CoA synthase	0	0	10000	101.482
			Succinyl CoA synthase	0	0	10000	101.482
28		Mt.Succinate + Mt.[Succinic dehydrogenase] -> Mt.Fumarate + Mt.[Succinic dehydrogenase]	Succinate	100	0.00512268	10000	101.482
			Succinate	0	0	10000	101.482
			Succinic dehydrogenase	0	0	10000	101.482
			Succinic dehydrogenase	0	0	10000	101.482
29		Mt.Fumarate + Mt.Fumarase -> Mt.Malate + Mt.Fumarase	Fumarate	100	0.00512268	10000	101.482
			Fumarate	0	0	10000	101.482
			Fumarase	0	0	10000	101.482
			Fumarase	0	0	10000	101.482
30		Mt.Malate + Mt.[Malate dehydrogenase] -> Mt.Oxaloacetate + Mt.[Malate dehydrogenase]	Malate	100	0.00512268	10000	101.482
			Malate	0	0	10000	101.482
			Malate dehydrogenase	0	0	10000	101.482
			Malate dehydrogenase	0	0	10000	101.482
31		Mt.Oxaloacetate + Mt.[Citrate Synthase] + Mt.[Phosphoenolpyruvate carboxylase] -> Mt.Citrate + Mt.[Citrate Synthase] + Mt.[Phosphoenolpyruvate carboxylase] + [BC].Phosphoenolpyruvate	Oxaloacetate	100	0.00513412	10000	101.482
			Oxaloacetate	0	0	10000	101.482
			Oxaloacetate	0	0	10000	101.482
			Oxaloacetate	95.1435	0.00425904	10000	101.482
			Citrate Synthase	0	0	10000	101.482
			Citrate Synthase	0	0	10000	101.482
			Citrate Synthase	0	0	10000	101.482
			Citrate Synthase	0	0	10000	101.482
			Phosphoenolpyruvate carboxylase	0	0	10000	101.482
			Phosphoenolpyruvate carboxylase	0	0	10000	101.482
			Phosphoenolpyruvate carboxylase	0	0	10000	101.482
			Phosphoenolpyruvate carboxylase	0	0	10000	101.482
32	Reaction_33	[Beta Cell].AKT + [Beta Cell].GSK3B -> [Beta Cell].[Inhibition of Glycogen Breakdown] + [Beta Cell].AKT	AKT	0	0	49000	218.797
			AKT	0	0	49000	218.797
			GSK3B	100	0.999997	2623.44	218.797
			GSK3B	0	0	20000	218.797
33	Reaction_34	[Beta Cell].AKT + [Beta Cell].[IKKab (NEMO)] -> [Beta Cell].IKab + [Beta Cell].AKT	AKT	0	0	49000	109.698
			AKT	0	0	49000	109.698
			IKKab (NEMO)	98.0544	0.963875	0.320857	109.698
			IKKab (NEMO)	0	0	20000	109.698
34	Reaction_35	[Beta Cell].IKab -> Nucleus.NFkB	IKab	100	0.216223	1070.51	396.04
35	Reaction_36	[Beta Cell].AKT + [Beta Cell].[TSC1/2] -> [Beta Cell].Rheb + [Beta Cell].AKT	AKT	0	0	49000	109.386
			AKT	0	0	49000	109.386
			TSC1/2	98.2525	0.225906	24.8559	109.386
			TSC1/2	0	0	10000	109.386
36	Reaction_37	[Beta Cell].Rheb -> [Beta Cell].mTORC1	Rheb	100	0.999882	3.80928	227.385
37	Reaction_38	[Beta Cell].mTORC1 + [Beta Cell].[4EBP1] -> [Beta Cell].eIF4E + [Beta Cell].mTORC1	mTORC1	0	0	19999	49.7512
			mTORC1	0	0	19999	49.7512
			4EBP1	100	0.171656	98.2437	49.7512
			4EBP1	0	0	5000	49.7512
38	Reaction_39	[Beta Cell].mTORC1 -> [Beta Cell].S6K	mTORC1	100	0.000644911	18710.2	99.7506
39	Reaction_40	[Beta Cell].S6K -> [Beta Cell].[Ribosomal S6]	S6K	100	0.310873	508.541	198
40	Reaction_41	[BC].eIF4E -> [BC].[Protein Synthesis]	eIF4E	100	0.328881	219.982	99.0099
41	Reaction_42	[BC].[Ribosomal S6] -> [BC].[Protein Synthesis]	Ribosomal S6	100	0.025804	8700.34	297.65
42	Reaction_43	[BC].[ERK1/2] -> Nu.AP1 + Nu.PDX1	ERK1/2	100	0.00604166	36904.3	417.751
			ERK1/2	100	0.00604166	36904.3	417.751
43	Reaction_44	Nu.AP1 + Nu.[Insulin & IAPP Gene] -> [ER].proInsulin + [ER].proIAPP + Nu.AP1	AP1	0	0	41000	468.776
			AP1	0	0	41000	468.776
			AP1	0	0	41000	468.776
			Insulin & IAPP Gene	100	0.999963	0.00364748	468.776
			Insulin & IAPP Gene	100	0.999963	0.00364748	468.776
			Insulin & IAPP Gene	0	0	90000	468.776
44	Reaction_45	[ER].proInsulin -> [BC].[Secretory Granules]	proInsulin	100	0.000367207	62961.4	299.501
45	Reaction_47	[ER].proIAPP -> [BC].[Secretory Granules]	proIAPP	100	0.000367207	62961.4	299.501
46	Reaction_48	[BC].[Secretory Granules] -> [BC].[hIAPP monomer] + [BC].Insulin	Secretory Granules	100	0.00284266	100204	697.129
			Secretory Granules	0	0	85000	697.129
47	Reaction_46	[BC].[hIAPP monomer] + [BC].Methylglyoxal -> [BC].[Amyloid Fibrils] + [BC].Methylglyoxal	hIAPP monomer	0	0	69000	696.467
			hIAPP monomer	0	0	69000	696.467
			Methylglyoxal	0	0	69000	696.467
			Methylglyoxal	0	0	69000	696.467
48	Reaction_49	[BC].[Amyloid Fibrils] + [BC].[CTR-RAMP3] -> [BC].[GαS/GαQ]	Amyloid Fibrils	100	0.713653	69600	497.64
			CTR-RAMP3	100	0.993406	50000	497.64
49	Reaction_50	[BC].[GαS/GαQ] -> [BC].[Ca+] + [BC].[Adenylyl Cyclase]	GαS/GαQ	100	0.00385169	53966.7	457.894
			GαS/GαQ	0	0	50000	457.894
50	Reaction_51	[BC].[Adenylyl Cyclase] + [BC].ATP -> [BC].cAMP + [BC].[Adenylyl Cyclase] + [BC].[Closure of K+ Channels]	Adenylyl Cyclase	0	0	45000	695.823
			Adenylyl Cyclase	0	0	45000	695.823
			Adenylyl Cyclase	0	0	45000	695.823
			ATP	100	0.00868091	47036.1	695.823
			ATP	0	0	58300	695.823
			ATP	100	0.00868091	47036.1	695.823
51	Reaction_52	[BC].[Ca+] -> [BC].[Secretory Granules]	Ca+	100	0.000949983	26186.9	149.75
52	Reaction_54	[ER].proIAPP + [ER].proInsulin + [ER].[Chaperon BiP] -> [ER].PERK + [ER].ATF6 + [ER].[IRE1α] + [ER].proInsulin + [ER].proIAPP	proIAPP	0	0	90000	318.302
			proIAPP	0	0	90000	318.302
			proIAPP	0	0	90000	318.302
			proIAPP	0	0	90000	318.302
			proIAPP	0	0	90000	318.302
			proInsulin	0	0	90000	318.302
			proInsulin	0	0	90000	318.302
			proInsulin	0	0	90000	318.302
			proInsulin	0	0	90000	318.302
			proInsulin	0	0	90000	318.302
			Chaperon BiP	100	0.9993	4696.69	318.302
			Chaperon BiP	100	0.99912	4696.69	318.302
			Chaperon BiP	100	0.997413	4696.69	318.302
			Chaperon BiP	0	0	30000	318.302
			Chaperon BiP	0	0	30000	318.302
53	Reaction_55	[Endoplasmic Reticulum].PERK + [Endoplasmic Reticulum].[eIF4α] -> [Endoplasmic Reticulum].ATF4 + [Endoplasmic Reticulum].PERK	PERK	0	0	37000	397.727
			PERK	0	0	37000	397.727
			eIF4α	100	0.997295	4.86098e-07	397.727
			eIF4α	0	0	35000	397.727
54	Reaction_56	[Endoplasmic Reticulum].[IRE1α] -> [Endoplasmic Reticulum].XBP1	IRE1α	100	0.0174706	411.978	496.644
55	Reaction_57	[Endoplasmic Reticulum].ATF4 -> [Endoplasmic Reticulum].REDD1	ATF4	100	0.0145099	20423.3	496.454
56	Reaction_58	[Endoplasmic Reticulum].ATF6 -> [Endoplasmic Reticulum].[ER Stress]	ATF6	100	0.0031149	3446.05	298.789
57	Reaction_59	[Endoplasmic Reticulum].XBP1 -> [Endoplasmic Reticulum].[ER Stress]	XBP1	100	0.0013079	54405	299.094
58	Reaction_60	[Endoplasmic Reticulum].REDD1 -> [Endoplasmic Reticulum].[ER Stress]	REDD1	100	0.00133051	68653.7	299.084
59	Reaction_61	[Endoplasmic Reticulum].[ER Stress] -> [Beta Cell].CytoC	ER Stress	100	0.000105099	159185	174.828
60	Reaction_63	[Beta Cell].Sorbitol + [Beta Cell].[Sorbitol Dehydrogenase] -> [Beta Cell].[Fructose 1,6-bisphosphate] + [Beta Cell].[Sorbitol Dehydrogenase]	Sorbitol	100	0.0141313	4718.83	445.82
			Sorbitol	0	0	24000	445.82
			Sorbitol Dehydrogenase	0	0	25000	445.82
			Sorbitol Dehydrogenase	0	0	25000	445.82
61	Reaction_64	[Beta Cell].DHAP + [Beta Cell].[Methylglyoxal synthase] -> [Beta Cell].Methylglyoxal + [Beta Cell].[Methylglyoxal synthase]	DHAP	100	0.0166038	29444.9	695.035
			DHAP	0	0	49000	695.035
			Methylglyoxal synthase	0	0	15000	695.035
			Methylglyoxal synthase	0	0	15000	695.035
62	Reaction_66	[BC].RAGE + [BC].[Amyloid Fibrils] -> [BC].PKC	RAGE	100	0.994957	30000	298.584
			Amyloid Fibrils	100	0.428861	69600	298.584
63	Reaction_67	[BC].PKC + [BC].IRS1 + [BC].MAPK -> [BC].[Insulin Resistance] + [BC].PKC + [BC].MAPK	PKC	0	0	30000	99.8981
			PKC	0	0	30000	99.8981
			PKC	100	0.000329084	25449.2	99.8981
			IRS1	100	0.000141831	41576.6	99.8981
			IRS1	0	0	49000	99.8981
			IRS1	0	0	49000	99.8981
			MAPK	0	0	19000	99.8981
			MAPK	0	0	19000	99.8981
			MAPK	0	0	19000	99.8981
64	Reaction_68	[Beta Cell].PKC -> [Beta Cell].MAPK + [Beta Cell].RAS + [Beta Cell].JAK + [Beta Cell].JNK	PKC	100	0.000329084	25449.2	89.8652
			PKC	100	0.000328873	25449.2	89.8652
			PKC	84.2839	0.000259444	23705.9	89.8652
			PKC	100	0.000329084	25449.2	89.8652
65	Reaction_70	[Beta Cell].JAK -> Nucleus.STAT3	JAK	100	0.994399	65.265	297.65
66	Reaction_71	[Beta Cell].JNK + [Beta Cell].[IKKab (NEMO)] -> [Beta Cell].IKab + [Beta Cell].JNK	JNK	0	0	19000	99.7506
			JNK	0	0	19000	99.7506
			IKKab (NEMO)	98.0544	0.963875	0.000108296	99.7506
			IKKab (NEMO)	0	0	20000	99.7506
67	Reaction_72	Nu.NFkB + Nu.[RAGE & NLRP3 genes] -> [BC].NLRP3 + [BC].RAGE + Nu.NFkB	NFkB	0	0	38900	323.249
			NFkB	0	0	38900	323.249
			NFkB	0	0	38900	323.249
			RAGE & NLRP3 genes	0	0	30000	323.249
			RAGE & NLRP3 genes	0	0	30000	323.249
			RAGE & NLRP3 genes	0	0	30000	323.249
68	Reaction_73	Nu.NFkB + Nu.[Inflammatory Cytokine Genes] -> [BC].[TNFα] + [BC].[IL1β] + [BC].IL6 + Nu.NFkB	NFkB	0	0	38900	254.351
			NFkB	0	0	38900	254.351
			NFkB	0	0	38900	254.351
			NFkB	0	0	38900	254.351
			Inflammatory Cytokine Genes	100	0.439787	17.1521	254.351
			Inflammatory Cytokine Genes	100	0.879575	17.1521	254.351
			Inflammatory Cytokine Genes	100	0.879575	17.1521	254.351
			Inflammatory Cytokine Genes	0	0	50000	254.351
69	Reaction_74	Nucleus.STAT3 + Nucleus.[Inflammatory Cytokine Genes] -> [Beta Cell].IL18 + [Beta Cell].[IL1β] + [Beta Cell].IL6 + Nucleus.STAT3	STAT3	0	0	29500	254.351
			STAT3	0	0	29500	254.351
			STAT3	0	0	29500	254.351
			STAT3	0	0	29500	254.351
			Inflammatory Cytokine Genes	100	0.439787	17.1521	254.351
			Inflammatory Cytokine Genes	100	0.879575	17.1521	254.351
			Inflammatory Cytokine Genes	100	0.879575	17.1521	254.351
			Inflammatory Cytokine Genes	0	0	50000	254.351
70	Reaction_75	[Beta Cell].PKC -> Mitochondria.NOX1	PKC	100	0.000406159	25449.2	99.8336
71	Reaction_76	Mitochondria.NOX1 + Mitochondria.NADPH -> Mitochondria.ROS + Mitochondria.NOX1	NOX1	0	0	29500	746.004
			NOX1	0	0	29500	746.004
			NADPH	100	0.999658	0.113339	746.004
			NADPH	0	0	70000	746.004
72	Reaction_77	[Endoplasmic Reticulum].proIAPP + [Beta Cell].[Ubiquitin Ligases] -> [Beta Cell].[Polyubiquitinated Proteins] + [Beta Cell].[Ubiquitin Ligases]	proIAPP	100	0.000132544	62961.4	179.82
			proIAPP	0	0	90000	179.82
			Ubiquitin Ligases	0	0	15000	179.82
			Ubiquitin Ligases	0	0	15000	179.82
73	Reaction_79	[ER].proInsulin -> [BC].[Polyubiquitinated Proteins]	proInsulin	100	0.000132544	62961.4	179.82
74	Reaction_80	[BC].[Amyloid Fibrils] + [BC].FAS -> [BC].FADD + [BC].FLIP	Amyloid Fibrils	100	0.175095	69600	121.866
			Amyloid Fibrils	100	0.175095	69600	121.866
			FAS	100	0.270814	45000	121.866
			FAS	100	0.270814	45000	121.866
75	Reaction_81	[BC].FADD + [BC].Procaspases -> [BC].[Caspase 8] + [BC].[Caspase 10] + [BC].FADD	FADD	0	0	45000	258.397
			FADD	0	0	45000	258.397
			FADD	0	0	45000	258.397
			Procaspases	98.6739	0.476533	0.565989	258.397
			Procaspases	100	0.49992	0.0104108	258.397
			Procaspases	0	0	50000	258.397
76	Reaction_82	[BC].FLIP + [BC].Procaspases -> [BC].[Caspase 2] + [BC].[Caspase 1] + [BC].FLIP	FLIP	0	0	45000	258.397
			FLIP	0	0	45000	258.397
			FLIP	0	0	45000	258.397
			Procaspases	100	0.49992	0.0104108	258.397
			Procaspases	100	0.499957	0.0104108	258.397
			Procaspases	0	0	50000	258.397
77	Reaction_83	[BC].[Caspase 8] -> [BC].BID	Caspase 8	100	0.223163	1364.45	495.05
78	Reaction_84	[BC].BID -> [BC].CytoC	BID	100	0.00958979	37550.7	596.311
79	Reaction_85	[BC].CytoC -> [BC].APAF1	CytoC	100	0.00372193	84374.7	696.833
80	Reaction_86	[BC].APAF1 -> [BC].[Caspase 9]	APAF1	100	0.00506464	69050.7	696.467
81	Reaction_87	[BC].[Caspase 9] -> [BC].[Caspase 3/6/7]	Caspase 9	100	0.00506814	69000.1	696.467
82	Reaction_88	[BC].[Caspase 10] -> [BC].[Caspase 3/6/7]	Caspase 10	100	0.00255752	30071.5	199.203
83	Reaction_89	[BC].[Caspase 3/6/7] -> [BC].PARP	Caspase 3/6/7	100	0.00500797	89027.9	895.472
84	Reaction_90	[BC].PARP -> [BC].[BC Death]	PARP	100	0.013334	59522.2	1191.96
85	Reaction_78	Mt.ROS -> [BC].NLRP3	ROS	100	0.000562373	110050	299.359
86	Reaction_91	[BC].NLRP3 -> [BC].Inflammasome + [BC].[Caspase 1]	NLRP3	100	0.00217717	74998.4	448.316
			NLRP3	100	0.00218222	74998.4	448.316
87	Reaction_92	[BC].Inflammasome -> [BC].IL18 + [BC].[IL1β]	Inflammasome	100	0.00460614	45053.6	417.91
			Inflammasome	100	0.00460614	45053.6	417.91
88	Reaction_93	[BC].[Caspase 1] -> [BC].[BC Death]	Caspase 1	100	0.00023818	118874	199.711
89	Reaction_94	[BC].[Caspase 2] -> [BC].[BC Death]	Caspase 2	100	0.00255997	30071.5	199.203
90	Reaction_96	[BC].mTORC1 + [BC].TFEB -> [BC].[Depletion of Lysosome] + [BC].mTORC1	mTORC1	0	0	19999	502.855
			mTORC1	0	0	19999	502.855
			TFEB	100	0.999659	10305.7	502.855
			TFEB	0	0	45000	502.855
91	Reaction_97	[BC].[Ca+] -> [BC].Calpain	Ca+	100	0.0104559	26186.9	497.238
92	Reaction_98	[BC].Calpain + [BC].LYSOSOMES -> [BC].[Depletion of Lysosome] + [BC].Calpain	Calpain	0	0	49000	458.827
			Calpain	0	0	49000	458.827
			LYSOSOMES	100	0.942684	14.1591	458.827
			LYSOSOMES	0	0	90000	458.827
93	Reaction_99	Mt.ROS + [BC].LYSOSOMES -> [BC].[Depletion of Lysosome] + Mt.ROS	ROS	0	0	70000	458.827
			ROS	0	0	70000	458.827
			LYSOSOMES	100	0.942684	14.1591	458.827
			LYSOSOMES	0	0	90000	458.827
94	Reaction_100	[BC].[Depletion of Lysosome] -> [BC].p62	Depletion of Lysosome	100	0.00530604	26921.5	893.121
95	Reaction_102	[BC].p62 -> [BC].[AUTOPHAGY DEFECT]	p62	100	0.00262163	103881	697.195
96	Reaction_95	Nu.PDX1 + Nu.[Insulin & IAPP Gene] -> [ER].proInsulin + [ER].proIAPP + Nu.PDX1	PDX1	0	0	41000	468.776
			PDX1	0	0	41000	468.776
			PDX1	0	0	41000	468.776
			Insulin & IAPP Gene	100	0.999963	0.00364748	468.776
			Insulin & IAPP Gene	100	0.999963	0.00364748	468.776
			Insulin & IAPP Gene	0	0	90000	468.776
97	Reaction_32	[BC].mTORC1 + [BC].ULK1 -> [BC].[AUTOPHAGY DEFECT] + [BC].mTORC1	mTORC1	0	0	19999	407.678
			mTORC1	0	0	19999	407.678
			ULK1	100	1	9.19968e-07	407.678
			ULK1	0	0	36000	407.678

## Sheet: Compartment
Sr. No.	Compartment	Components
1	Beta Cell	98
2	Endoplasmic Reticulun	11
3	Nucleus	7
4	Mitochondria	21
5	Total Number of Species	137
6	Total Number of Reactions	97
7	Total Number of Parameters	195

## Sheet: High flux Reac
Sr. No.	Reactions	Molecular Flux
1	[BC].PARP -> [BC].[BC Death]	1191.96
2	[BC].[Caspase 3/6/7] -> [BC].PARP	895.472
3	[BC].[Depletion of Lysosome] -> [BC].p62	893.121
4	Mitochondria.NOX1 + Mitochondria.NADPH -> Mitochondria.ROS + Mitochondria.NOX1	746.004
5	[BC].p62 -> [BC].[AUTOPHAGY DEFECT]	697.195
6	[BC].[Secretory Granules] -> [BC].[hIAPP monomer] + [BC].Insulin	697.129
7	[BC].CytoC -> [BC].APAF1	696.833
8	[BC].[hIAPP monomer] + [BC].Methylglyoxal -> [BC].[Amyloid Fibrils] + [BC].Methylglyoxal	696.467
9	[BC].APAF1 -> [BC].[Caspase 9]	696.467
10	[BC].[Caspase 9] -> [BC].[Caspase 3/6/7]	696.467
11	[BC].[Adenylyl Cyclase] + [BC].ATP -> [BC].cAMP + [BC].[Adenylyl Cyclase] + [BC].[Closure of K+ Channels]	695.823
12	[Beta Cell].DHAP + [Beta Cell].[Methylglyoxal synthase] -> [Beta Cell].Methylglyoxal + [Beta Cell].[Methylglyoxal synthase]	695.035
13	[BC].BID -> [BC].CytoC	596.311
14	[BC].mTORC1 + [BC].TFEB -> [BC].[Depletion of Lysosome] + [BC].mTORC1	502.855

## Sheet: Trigger event Reac
Sr. No.	Trigger Event Reactions
1	[Beta Cell].AKT + [Beta Cell].GSK3B -> [Beta Cell].[Inhibition of Glycogen Breakdown] + [Beta Cell].AKT
2	[Beta Cell].mTORC1 + [Beta Cell].TFEB -> [Beta Cell].[Depletion of Lysosome] + [Beta Cell].mTORC1
3	[Beta Cell].GLUCOSE + [Beta Cell].Hexokinase + [Beta Cell].[Aldose Reductase] -> [Beta Cell].[Glucose-6-Phosphate] + [Beta Cell].Hexokinase + [Beta Cell].Sorbitol + [Beta Cell].[Aldose Reductase]
4	[Beta Cell].PKC + [Beta Cell].IRS1 + [Beta Cell].MAPK -> [Beta Cell].[Insulin Resistance] + [Beta Cell].PKC + [Beta Cell].MAPK
5	[Endoplasmic Reticulum].proIAPP + [Endoplasmic Reticulum].proInsulin + [Endoplasmic Reticulum].[Chaperon BiP] -> [Endoplasmic Reticulum].PERK + [Endoplasmic Reticulum].ATF6 + [Endoplasmic Reticulum].[IRE1α] + [Endoplasmic Reticulum].proInsulin + [Endoplasmic Reticulum].proIAPP

## Sheet: Conc Reac
Insulin Receptor	50000
Insulin	69000
IRS1	49000
SHP2	8959
GRB2	8959
PI3K	17500
PIP2	19800
PIP3	29600
AKT	49000
RAS	37000
RAF	19800
MEK	29600
ERK1/2	39000
GLUT4	49700
GLUCOSE	49000
Hexokinase	20000
Glucose-6-Phosphate	42000
Phosphoglucose isomerase	10000
Fructose-6-Phosphate	10000
Phosphofructokinase	10000
Fructose 1,6-bisphosphate	60000
Fructose bisphosphate aldolase	10000
Gleceraldehyde 3-phosphate	49000
DHAP	49000
Glyceraldehyde 3-P dehydrogenase	10000
1, 3-bisphosphoglycerate	10000
Phosphoglycerate kinase	10000
3-Phosphoglycerate	19000
ATP	58300
Phosphoglycerate mutase	10000
2-Phosphoglycerate	19800
Enolase	10000
Phosphoenolpyruvate	20000
Pyruvate kinase	10000
PYRUVATE	38000
Pyruvate dehydrogenase	10000
GSK3B	20000
Inhibition of Glycogen Breakdown	0
IKKab (NEMO)	20000
IKab	20000
TSC1/2	-1309.32
Rheb	10000
mTORC1	19999
4EBP1	5000
eIF4E	5000
S6K	9900
Ribosomal S6	19000
Protein Synthesis	39000
Secretory Granules	85000
hIAPP monomer	69000
Amyloid Fibrils	69600
CTR-RAMP3	50000
GαS/GαQ	50000
Adenylyl Cyclase	45000
cAMP	69000
Ca+	45000
Closure of K+ Channels	69000
CytoC	77000
Aldose Reductase	25000
Sorbitol	24000
Sorbitol Dehydrogenase	25000
Methylglyoxal	69000
RAGE	30000
PKC	30000
Insulin Resistance	29600
MAPK	13506.2
JNK	19000
JAK	19000
NLRP3	59900
IL6	49900
IL1β	91000
IL18	66000
TNFα	24900
Ubiquitin Ligases	15000
Polyubiquitinated Proteins	35000
FAS	45000
FADD	45000
FLIP	45000
Procaspases	20952.7
Caspase 8	25000
Caspase 10	25000
Caspase 1	69000
Caspase 2	25000
BID	48500
APAF1	69000
Caspase 9	69000
Caspase 3/6/7	89000
PARP	89000
Beta Cell Death	148000
Inflammasome	42000
TFEB	-44033.3
Depletion of Lysosome	77900
Calpain	49000
LYSOSOMES	90000
p62	87000
ULK1	36000
AUTOPHAGY DEFECT	105000
Methylglyoxal synthase	15000
Acetyl CoA	10000
Citrate Synthase	10000
Citrate	20000
Aconitase	10000
D-Isocitrate	10000
Isocitratedehydrogenase	10000
α ketoglutarate	10000
α KG dehydrogenase	10000
Succinyl CoA	10000
Succinyl CoA synthase	10000
Succinate	10000
Succinic dehydrogenase	10000
Fumarate	10000
Fumarase	10000
Malate	10000
Malate dehydrogenase	10000
Oxaloacetate	10000
Phosphoenolpyruvate carboxylase	10000
NOX1	29500
NADPH	70000
ROS	70000
NFkB	38900
AP1	53287.6
Insulin & IAPP Gene	90000
STAT3	29500
RAGE & NLRP3 genes	30000
Inflammatory Cytokine Genes	50000
PDX1	53287.6
proInsulin	90000
proIAPP	90000
Chaperon BiP	30000
PERK	0
IRE1α	37000
ATF6	37000
eIF4α	35000
ATF4	35000
XBP1	49500
REDD1	49000
ER Stress	89000

[truncated: 1 more sheets: Crosstalk Points]
